# Supplementary material for: Expression Profiling and MicroRNA Regulatory Networks of Homeobox Family Genes in Sugarcane Saccharum spontaneum L.
Source: MDPI journal article supplement (doi:10.3390/ijms23158724), 2022-08-05
Supplement: s1 [file s1]

|      |                                                                                                    |      |      |      |      |      |      |      |      |
|------|----------------------------------------------------------------------------------------------------|------|------|------|------|------|------|------|------|
| 1    | 10                                                                                                 | 20   | 30   | 40   | 50   | 60   | 70   | 80   | 90   |
| 1    | ATGGCGATGGTGGTGGTGGCGGGGCGGCAAGGACCGGTCTCGCCTGGCGGGCGGTGGGGCGCCGACAGGTGGACACGGGCAAGTACGTGCGCTACACC |      |      |      |      |      |      |      |      |
| 1    | M A M V V V G G G K D R S S P G G G G A P Q V D T G K Y V R Y T                                    |      |      |      |      |      |      |      |      |
| 97   | 106                                                                                                | 116  | 126  | 136  | 146  | 156  | 166  | 176  | 186  |
| 33   | CCCAGACAGGTGGAGGCGCTCGAGCGGGTCTACAGCGAGTGCCCAAGCCAGCTCGCTGCGCAGGCAGCAGCTCATCAGGGAGTGCCCCATACTC     |      |      |      |      |      |      |      |      |
|      | P E Q V E A L E R V Y S E C P K P S S L R R Q Q L I R E C P I L                                    |      |      |      |      |      |      |      |      |
| 193  | 202                                                                                                | 212  | 222  | 232  | 242  | 252  | 262  | 272  | 282  |
| 65   | AGCAACATCGAGCCCAGCAGATCAAGGTCTGGTTCCAGAACCAGGTGCCGCGAGAAGCAGCGGAAGGAGGCCTCGCGCCTGCAGACTGTGAAC      |      |      |      |      |      |      |      |      |
|      | S N I E P K Q I K V W F Q N R R C R E K Q R K E A S R L Q T V N                                    |      |      |      |      |      |      |      |      |
| 289  | 298                                                                                                | 308  | 318  | 328  | 338  | 348  | 358  | 368  | 378  |
| 97   | CGGAAGCTGACTGCGATGAACAAGCTGTTGATGGAGGAGAATGACAGGCTGCAGAAGCAGGTCTCCCGACTCGTCTACGAGAATGGGTACATGCGA   |      |      |      |      |      |      |      |      |
|      | R K L T A M N K L L M E E N D R L Q K Q V S R L V Y E N G Y M R                                    |      |      |      |      |      |      |      |      |
| 385  | 394                                                                                                | 404  | 414  | 424  | 434  | 444  | 454  | 464  | 474  |
| 129  | CAGCAGTCCATAATCCTTGCTGCGACCACAGACAGCTGTGAGTCTGTGGTCACAAGTGGTCAGCACCACCAACAGCAAAACCCAGCAGCT         |      |      |      |      |      |      |      |      |
|      | Q Q L H N P S A A T T D T S C E S V V T S G Q H H Q Q Q N P A A                                    |      |      |      |      |      |      |      |      |
| 481  | 490                                                                                                | 500  | 510  | 520  | 530  | 540  | 550  | 560  | 570  |
| 161  | CCGCGTCTCAACGGGACGCGAATAACCCAGCTGGTCTACTAGCTATCGCTGAGGAGACCTTGGCAGAGTTCTGTGCGAAAGCGACAGGAAGTGT     |      |      |      |      |      |      |      |      |
|      | P R P Q R D A N N P A G L L A I A E E T L A E F L S K A T G T A                                    |      |      |      |      |      |      |      |      |
| 577  | 586                                                                                                | 596  | 606  | 616  | 626  | 636  | 646  | 656  | 666  |
| 193  | GTCGATTGGGTGCAATGGTTGGGATGAAGCCTGGTCCGGATTCCATTGGAATCATCGCTGTTTCGCACAATTGTAGTGGCGTAGCAGCCCAGCT     |      |      |      |      |      |      |      |      |
|      | V D W V Q M V G M K P G P D S I G I I A V S H N C S G V A A R A                                    |      |      |      |      |      |      |      |      |
| 673  | 682                                                                                                | 692  | 702  | 712  | 722  | 732  | 742  | 752  | 762  |
| 225  | TGCGGCCTAGTGAGCCTTGAGCCCAAAAGTCGCGGAGATCCTCAAGGATCGCCCTTCTTGGTACCGCGACTGCCGGTGGCTGGATATCCTCCAT     |      |      |      |      |      |      |      |      |
|      | C G L V S L E P T K V A E I L K D R P S W Y R D C R C V D I L H                                    |      |      |      |      |      |      |      |      |
| 769  | 778                                                                                                | 788  | 798  | 808  | 818  | 828  | 838  | 848  | 858  |
| 257  | GTTATCCCTACGGGTAACGGTGGAACTATCGAGCTTATCTACATGCAGACTTACGCACCGACAACCTTGGCGGCACACGCGACTTTTGGACTCTC    |      |      |      |      |      |      |      |      |
|      | V I P T G N G G T I E L I Y M Q T Y A P T T L A A P R D F W T L                                    |      |      |      |      |      |      |      |      |
| 865  | 874                                                                                                | 884  | 894  | 904  | 914  | 924  | 934  | 944  | 954  |
| 289  | CGATACACTAGTGGTCTTGAGGATGGCAGTCTTGATCTGTGAGAGATCATTGACACAATCGACTGGAGGCCCATCAGGACCAACACCTCCAAAT     |      |      |      |      |      |      |      |      |
|      | R Y T S G L E D G S L V I C E R S L T Q S T G G P S G P N T P N                                    |      |      |      |      |      |      |      |      |
| 961  | 970                                                                                                | 980  | 990  | 1000 | 1010 | 1020 | 1030 | 1040 | 1050 |
| 321  | TTTGTGAGAGCCGAAGTGCTTCTAGTGGCTATTTGATTGACCTTGTGAGGGAGGTGGCTCCATGATTACATTGTGGATCATGTTGATTAGAT       |      |      |      |      |      |      |      |      |
|      | F V R A E V L P S G Y L I R P C E G G G S M I H I V D H V D L D                                    |      |      |      |      |      |      |      |      |
| 1057 | 1066                                                                                               | 1076 | 1086 | 1096 | 1106 | 1116 | 1126 | 1136 | 1146 |
| 353  | GCTTGGAGTGTGCCTGAGGTCTTAGACCACTTTATGAATCTCCAAAGATTCTTGCACAGAAAACAACCTATTGCTGCACTGCGCCACATTAGGCAA   |      |      |      |      |      |      |      |      |
|      | A W S V P E V L R P L Y E S P K I L A Q K T T I A A L R H I R Q                                    |      |      |      |      |      |      |      |      |
| 1153 | 1162                                                                                               | 1172 | 1182 | 1192 | 1202 | 1212 | 1222 | 1232 | 1242 |
| 385  | ATTGCGCATGAATCGAGTGGGGAAATGCCCTATGGAGGGGGCCGCCAGCCAGCGGTGTTGAGAACATTCAGCCAGAGGCTTAGCAGGGGTTTCAAT   |      |      |      |      |      |      |      |      |
|      | I A H E S S G E M P Y G G G R Q P A V L R T F S Q R L S R G F N                                    |      |      |      |      |      |      |      |      |
| 1249 | 1258                                                                                               | 1268 | 1278 | 1288 | 1298 | 1308 | 1318 | 1328 | 1338 |
| 417  | GATGCTGTCAATGGGTTTCCAGATGACGGCTGGTCACTGATGAGCAGTGACGGTGTGAGGATGTTACTATTGCTATCAACTCCTCTCCAAACAAA    |      |      |      |      |      |      |      |      |
|      | D A V N G F P D D G W S L L M S S D G A E D V T I A I N S S P N K                                  |      |      |      |      |      |      |      |      |
| 1345 | 1354                                                                                               | 1364 | 1374 | 1384 | 1394 | 1404 | 1414 | 1424 | 1434 |
| 449  | CTTATTGGTTTTCATGTCAACTCCTCCAGCTGTTTACTGCGATTGGAGGTGGCATCCTGTGTGCTAAGGCATCAATGCTGCTTCAAGATGTGCCA    |      |      |      |      |      |      |      |      |
|      | L I G S H V N S S Q L F T A I G G G I L C A K A S M L L Q N V P                                    |      |      |      |      |      |      |      |      |
| 1441 | 1450                                                                                               | 1460 | 1470 | 1480 | 1490 | 1500 | 1510 | 1520 | 1530 |
| 481  | CCTGCCCTACTAGTAGCATTCTGAGGGAGCATCGCTCCGAATGGGCTGATCCTGGTGTGATGCTTATTCTGCTGTGCTCTGAGGGCTAGTCCA      |      |      |      |      |      |      |      |      |
|      | P A L L V R F L R E H R S E W A D P G V D A Y S A A A L R A S P                                    |      |      |      |      |      |      |      |      |
| 1537 | 1546                                                                                               | 1556 | 1566 | 1576 | 1586 | 1596 | 1606 | 1616 | 1626 |
| 513  | TATGCAGTTCCTGGCTTGGCGCTAGTGGGTTTATGGGCAGCCAGGTATTCTACCGCTTGCACATACCTTAGAGAAATGAAGAGTTCCTGGAGGTT    |      |      |      |      |      |      |      |      |
|      | Y A V P G L R A S G F M G S Q V I L P L A H T L E N E E F L E V                                    |      |      |      |      |      |      |      |      |
| 1633 | 1642                                                                                               | 1652 | 1662 | 1672 | 1682 | 1692 | 1702 | 1712 | 1722 |
| 545  | ATTAGGCTTGAGGGACACAGCCTCTGCCATGATGAAGTTGTTCTGTGACGAGATATGTATCTTCTGAGTTGTGAGTGGCGTGGATGAAAATGCA     |      |      |      |      |      |      |      |      |
|      | I R L E G H S L C H D E V V L S R D M Y L L Q L C S G V D E N A                                    |      |      |      |      |      |      |      |      |
| 1729 | 1738                                                                                               | 1748 | 1758 | 1768 | 1778 | 1788 | 1798 | 1808 | 1818 |
| 577  | GCTGGTGCATGTGCACAGCTTGTCTTTGCACCCATCGATGAATCTTTTGCTGATGATGCACCACTGTACCCCTCAGGCTTCCGTGTCAATCCACTG   |      |      |      |      |      |      |      |      |
|      | A G A C A Q L V F A P I D E S F A D D A P L L P S G F R V I P L                                    |      |      |      |      |      |      |      |      |
| 1825 | 1834                                                                                               | 1844 | 1854 | 1864 | 1874 | 1884 | 1894 | 1904 | 1914 |
| 609  | GACGCAAGACGGATCCACCATCAGGCACACGCACACTTGACATAGCATCTACTCTTGAGGTTGGATCTGGTGGGACTACTCGTGTTCAGTGTAT     |      |      |      |      |      |      |      |      |
|      | D A K T D P P S G T R T L D I A S T L E V G S G G T T R V S S D                                    |      |      |      |      |      |      |      |      |
| 1921 | 1930                                                                                               | 1940 | 1950 | 1960 | 1970 | 1980 | 1990 | 2000 | 2010 |
| 641  | GCCTCCAGCACCTGCAACACAAGATCAGTGCTGACCATTGCTTTCCAGTTCTCATATGAGAATCACCTACGGGAAAGCGTCGCAGCAATGGCCAGG   |      |      |      |      |      |      |      |      |
|      | A S S T C N T R S V L T I A F Q F S Y E N H L R E S V A A M A R                                    |      |      |      |      |      |      |      |      |
| 2017 | 2026                                                                                               | 2036 | 2046 | 2056 | 2066 | 2076 | 2086 | 2096 | 2106 |
| 673  | CAATATGTGAGACTGTGGTGGCATCGGTGCAGAGGTTGGCCATGGCAATAGCTCCTTCCCGTCTTGGTGGACAGCTGAAATGAAGCAAACTCCA     |      |      |      |      |      |      |      |      |
|      | Q Y V R T V V A S V Q R V A M A I A P S R L G G Q L E M K Q T P                                    |      |      |      |      |      |      |      |      |
| 2113 | 2122                                                                                               | 2132 | 2142 | 2152 | 2162 | 2172 | 2182 | 2192 | 2202 |
|      | GGATCTCTGAGGCACACACACTTGCAAGGTGGATCGGCAGGAGCTACAGGTTTCACACTGGAGCGGAACTCCTTCGCACAGACACCCAATGCAC     |      |      |      |      |      |      |      |      |

```

705      G S P E A H T L A R W I G R S Y R F H T G A E L L R T D T Q C T

          2218      2228      2238      2248      2258      2268      2278      2288      2298
2209    GATGCTTCCTTGAAAGCACTGTGGCAACTCAGACTCGATCATGTGCTGTTCCCTGAAGGCTACTCCTGTGTTACCTTCGCCAACCAAGCCGGC
737      D A S L K A L W Q H S D S I M C C S L K A T P V F T F A N Q A G

          2314      2324      2334      2344      2354      2364      2374      2384      2394
2305    CTCGACATGCTGGAGACGACGTTGATTGCTCTCCAGGACATCTCCCTTGAGAAGATCCTTGATGATGATGGCAGGAAGGCGCTCTGCACTGAGTAC
769      L D M L E T T L I A L Q D I S L E K I L D D D G R K A L C T E Y

          2410      2420      2430      2440      2450      2460      2470      2480      2490
2401    CCTAAGATTATGCAGCAGGGCTTCGCATACCTCCCCGGCGGCGTGTGTGTATCGAGCATGGGGCGGCCGGTGTGCGTACGAGCAGGCGGTGGCGTGG
801      P K I M Q Q G F A Y L P G G V C V S S M G R P V S Y E Q A V A W

          2506      2516      2526      2536      2546      2556
2497    AAGGTCCTGAGCGACGACGACACCCGCACTGCCTCGCCTTCATGTTTCGTGAACTGGTCCTTCGTGTGA
833      K V L S D D D T P H C L A F M F V N W S F V *

```

Supplementary Figure S6 ORF sequence of *SsHB15* and its encoding protein. The protein marked with yellow color represents the Homeodomain (PF00046)
