# Supplementary material for: Expression Profiling and MicroRNA Regulatory Networks of Homeobox Family Genes in Sugarcane Saccharum spontaneum L.
Source: MDPI journal article supplement (doi:10.3390/ijms23158724), 2022-08-05
Supplement: s1 [file s1]

|           |                                                                                            |            |
|-----------|--------------------------------------------------------------------------------------------|------------|
| SsHB3-1   | : -----WRPQGLPERAVTITRAWLFEHFLH-PYPDSVDKHI-ARQT-----GTSRSQVSNWFINARVRL-WKPMVEE-            | BEL        |
| SsHB24    | : -----WRPQGLPERAVSITRAWLFEHFLH-PYPDSVDKHI-ARQT-----GTSRNQVSNWFINARVRL-WKPMVEE-            |            |
| SsHB51-1  | : -----WRPQGLPERAVSVITRAWLFEHFLH-PYPTDGDQKQ-ARQT-----GITRNQVSNWFINARVRL-WKPMVEE-           |            |
| SsHB75-2  | : -----WRPQGLPERAVSVITRAWLFEHFLH-PYPKDSKIM-ARQT-----GITRSQVSNWFINARVRL-WKPMVEE-            |            |
| SsHB89-1  | : -----WRPQGLPERAVSVITRAWLFEHFLH-PYPTDSKQK-ARQT-----GITRNQVSNWFINARVRL-WKPMVEE-            | DDT        |
| SbHB50    | : -----WRPQGLPERAVSVITRAWLFEHFLH-PYPTDGDQKQ-ARQT-----GITRNQVSNWFINARVRL-WKPMVEE-           |            |
| AT2G35940 | : -----WRPQGLPERAVSVITRAWLFEHFLH-PYPKDSKIM-ARQT-----GITRSQVSNWFINARVRL-WKPMVEE-            |            |
| SsHB31-1  | : -----RDNAGAKKSPQIQIMEKFYSYDV---QYPKPEEMGEYATCV-----GITYSQVRIWEKERERRKDRREMGI-            |            |
| SsHB54-1  | : -----KPVKRMKTPYQLEVIKTYAVE---QYPSEAMRLE- SAKI-----GISDRQIQMWECHRLKDK-RKP---              | HD-ZIP I   |
| SbHB1     | : -----RDNAGAKKSPQIQIMEKFYSYDA---QYPKPEEMGEYATCV-----GITYSQVRIWEKERERRKDRREMGI-            |            |
| AT4G03250 | : -----NSKKRKLKTPMQVMAIFENFYNEH---KYPTTEEMKGK-AEEV-----GITEKQVSGWECHRLKDK-KRHVKED-         |            |
| SsHB6     | : -----GEKKRRLNVEQVRTTEKNFELG---NKLEPERKLO-ARAL-----GLOPRQVAIWQFQNRARW-KTKQLEK-            |            |
| SsHB13-1  | : -----GERKKRRLSVEQVRTTERSFEVA---NKLEPERKAO-ARAL-----GLOPRQVAIWQFQNRARW-KTKQLEK-           | HD-ZIP II  |
| SsHB36-1  | : -----GEKKRRLSAEQVRAIERSFEVE---NKLEPERKAR-ARDL-----GLOPRQVAIWQFQNRARW-KTKQLEK-            |            |
| SsHB61-1  | : -----PEKKRRLTPEQVHLIERSFEVE---NKLEPERKTE-ARKL-----GLOPRQVAIWQFQNRARW-KTKQLEK-            |            |
| SsHB85-1  | : -----PEKKRRLTAEQVQLIERSFEVE---NKLEPERKTE-ARRL-----GMAPROQVAVWQFQNRARW-KTKQLET-           |            |
| SbHB77    | : -----PEKKRRLTAEQVQLIERSFEVE---NKLEPERKTE-ARRL-----GMAPROQVAVWQFQNRARW-KTKQLET-           | HD-ZIP III |
| AT3G01470 | : -----PEKKRRLTTEQVHLIERSFEVE---NKLEPERKTO-AKKL-----GLOPRQVAIWQFQNRARW-KTKQLEK-            |            |
| SsHB10    | : -----SRKKLRLSKDQAAVIEDSFKEH---NTLNPKQKAA-ARQL-----NLPKPRQEVWQFQNRARW-KTKQTEV-            |            |
| SsHB12-1  | : -----SRKKLRLSKEQSALIEDHFKHEH---STLNPKQKAA-ARQL-----NLPKPRQEVWQFQNRARW-KTKQTEV-           |            |
| SsHB23-1  | : -----TRKKLRLTKEQSALIEDHFKHEH---STLNPKQKVA-ARQL-----NLPKPRQEVWQFQNRARW-KTKQTEV-           | HD-ZIP IV  |
| SsHB73-1  | : -----SRKKLRLSKDQSAVIEDSFREH---PTLNPRQKAA-AQQL-----GIRPRQEVWQFQNRARW-KTKQTEV-             |            |
| SsHB99-1  | : -----GRKKLRLSKEQAAVIEECFKTH---STLNPKQKLA-ATRL-----GIRPRQEVWQFQNRARW-KTKQTEV-             |            |
| SbHB17    | : -----TRKKLRLTKEQSALIEDHFKHEH---STLNPKQKVA-ARQL-----NLPKPRQEVWQFQNRARW-KTKQTEV-           |            |
| AT5G06710 | : -----TRKKLRLSKDQSAVIEDSFKEH---STLNPKQKIA-ARQL-----NLPKPRQEVWQFQNRARW-KTKQTEV-            | HD-ZIP V   |
| SsHB1-1   | : -----DSGKYVRYTPEQVEVIERLYIDC---PKPTSSRRQQLRECPI-----LSNIEPKQIKVWQFQNRARW-KTKQTEV-        |            |
| SsHB14-2  | : -----DTGKYVRYTPEQVEVIERLYAEC---PKPTSSRRQQLRECPI-----LSNIEPKQIKVWQFQNRARW-KTKQTEV-        |            |
| SsHB15-1  | : -----DTGKYVRYTPEQVEVIERLYSEC---PKPTSSRRQQLRECPI-----LSNIEPKQIKVWQFQNRARW-KTKQTEV-        |            |
| SsHB42-1  | : -----DAGKYVRYTPEQVEVIERLYSEC---PKPTSSRRQQLRECPI-----LSNIEPKQIKVWQFQNRARW-KTKQTEV-        | KNOX       |
| SsHB48    | : -----DAGKYVRYTPEQVEVIERLYSEC---PKPTSSRRQQLRECPI-----LSNIEPKQIKVWQFQNRARW-KTKQTEV-        |            |
| SbHB24    | : -----DSGKYVRYTPEQVEVIERLYIDC---PKPTSSRRQQLRECPI-----LSNIEPKQIKVWQFQNRARW-KTKQTEV-        |            |
| AT1G52150 | : -----DNGKYVRYTPEQVEVIERLYHDC---PKPTSSRRQQLRECPI-----LSNIEPKQIKVWQFQNRARW-KTKQTEV-        |            |
| SsHB11-1  | : G-----KKKRYHRHTAHQIQIEEALFKEC---PHPDDKQRLK-SQEL-----GTPKPRQKQWQFQNRARW-KTKQTEV-          | NDX        |
| SsHB59-1  | : K-----RKKRYHRHTPHQIQIEEALFKEC---PHPDEKQGEI-SKRL-----GIDPRQKQWQFQNRARW-KTKQTEV-           |            |
| SsHB60-4  | : R-----RKKRYHRHTPRQIQIEEALFKEC---PHPDENQRMH-SREL-----GTEPRQKQWQFQNRARW-KTKQTEV-           |            |
| SsHB80-1  | : S-----KKKRYHRHTQHQIQIEEALFKEC---PHPDDKQKKE-SREL-----GTEPLQKQWQFQNRARW-KTKQTEV-           |            |
| SsHB83-1  | : A-----RKKRYHRHTQHQIQIEEALFKEC---PHPDDKQKKE-SREL-----GTEPLQKQWQFQNRARW-KTKQTEV-           | PHD        |
| SbHB74    | : A-----RKKRYHRHTQHQIQIEEALFKEC---PHPDDKQKKE-SREL-----GTEPLQKQWQFQNRARW-KTKQTEV-           |            |
| AT1G05230 | : N-----KKKRYHRHTQLQIQIEEALFKEC---PHPDDKQKKE-SREL-----GTEPLQKQWQFQNRARW-KTKQTEV-           |            |
| SsHB2-1   | : -----RKRKAGKLPDGTTSITKQWQWQHSKW-PYPTEDDKAK-VEET-----GLOLKQINNWFQNRARW-KTKQTEV-           |            |
| SsHB90-1  | : -----KRRKAGKLPDGTTSITKQWQWQHSKW-PYPTEDDKAK-VEET-----GLOLKQINNWFQNRARW-KTKQTEV-           | PINTOX     |
| SsHB97-1  | : -----RKRKAGKLPDGTASTTKAWWQAHKW-PYPTEDDKAK-VQET-----GLOLKQINNWFQNRARW-KTKQTEV-            |            |
| SsHB101-1 | : -----RKRKAGKLPDGTASTTKAWWQAHKW-PYPTEDDKAK-VQET-----GLOLKQINNWFQNRARW-KTKQTEV-            |            |
| SsHB104   | : -----RKRKAGKLPDGTASTTKAWWQAHKW-PYPTEDDKAK-VQET-----GLOLKQINNWFQNRARW-KTKQTEV-            |            |
| SbHB97    | : -----RKRKAGKLPDGTASTTKAWWQAHKW-PYPTEDDKAK-VQET-----GLOLKQINNWFQNRARW-KTKQTEV-            | PLINC      |
| AT1G62990 | : -----RKRKAGKLPDGTSTTVKQWQWQHSKW-PYPTEDDKAK-VEET-----GLOLKQINNWFQNRARW-KTKQTEV-           |            |
| SsHB84-3  | : -----KRRKRTLMNNEQIDELKALVDEPE---MHKNAVLQSWSEKLSL---QGS-EITASQKNWLNRRKAKL-AR-----         |            |
| SsHB86-1  | : -----KRRKRTLMNNEQIDELKALVDEPE---MHKNAVLQSWSEKLSL---QGS-EITASQKNWLNRRKAKL-AR-----         |            |
| SbHB65    | : -----KRRKRTLMNNEQIDELKALVDEPE---MHKNAVLQSWSEKLSL---QGS-EITASQKNWLNRRKAKL-AR-----         | SAWADEE    |
| AT4G03090 | : -----KRRKRSIMNADQMGMEKALAEED- LQNSASRQLWADKISQ---KGSEVITSSQKNWLNRRKAKL-AR-----           |            |
| SsHB68-1  | : -----KLFRIPPAAVEVIRKAFKAEN---ELPPRDVKEN-SREL-----GTSFEKIDKWEKNTRECA- LRDRKAE-            |            |
| SsHB88-1  | : -----RKGHFGPVVNQKLYEHFKTQ---QYPSRSVKER-AEEL-----GITFRQVSKWEETREHFA-                      |            |
| SsHB92-4  | : -----RKGHFGPVVNQKLYEHFKTQ---QYPSRSVKER-AEEL-----GITFRQVSKWEETREHFA-                      | WOX        |
| SbHB52    | : -----KLFRIPPAAVEVIRKAFKAEN---ELPPRDVKEN-SREL-----GTSFEKIDKWEKNTRECA- LRDRKAE-            |            |
| AT4G29940 | : -----RMFRLPRNAVEKIRQVFAET---ELPSKAVRDR-AKEL-----SIDPEKVNKWEKNTRECA- LRDRKAE-             |            |
| SsHB102-2 | : -----EWSARKRLKKVQLETTERVYLR- KRPTNTMISS-VQVT-----NLPKRTIKVWQFQNRARW-KTKQTEV-             |            |
| SbHB96    | : -----EWSARKRLKKVQLETTERVYLR- KRPTNTMISS-VQVT-----NLPKRTIKVWQFQNRARW-KTKQTEV-             | SAWADEE    |
| AT5G11270 | : -----RWSAQKRVKKAHIEETKVVYRS---KRPTNAVVS-VQVT-----NLPKRTIKVWQFQNRARW-KTKQTEV-             |            |
| SsHB38-1  | : -----RKRFRTKFTAEQKQRMQELSERLQWRLQKRDIAVDEWCRDI---GVGKGVFKVWMHNNKHNF-----                 |            |
| SsHB77    | : -----RKRFRTKFTPEQKERMLEFAEKQGWRIQRNDGALDSCDEI---GVKRRVFKVWMHNNKHNL-----                  |            |
| SsHB87-1  | : -----RKRFRTKFTPEQKEQLAFAERLQWRLQKRDIAVDEWCRDI---GVGKGVFKVWMHNNKHNF-----                  | SAWADEE    |
| SsHB91-1  | : -----RKRFRTKFTAEQKQRMQELSERLQWRLQKRDIAVDEWCRDI---GVGKGVFKVWMHNNKHNF-----                 |            |
| SsHB93-1  | : -----RKRFRTKFTPEQKEQLAFAERLQWRLQKRDIAVDEWCRDI---GVGKGVFKVWMHNNKHNL-----                  |            |
| SbHB64    | : -----RKRFRTKFTPEQKERMLEFAEKQGWRIQRNDGALDSCDEI---GVKRRVFKVWMHNNKHNL-----                  |            |
| AT1G14440 | : -----RKRFRTKFTPEQKEQLAFAERLQWRLQKRDIAVDEWCRDI---GVGKGVFKVWMHNNKHNL-----                  | SAWADEE    |
| SsHB40-1  | : MGRPPSTTGAPAFRFLPSEVAEEMEARLQQLNN---GIPSRGVLQI-ADKFSASPERAGKVALQPKQVWVWQFQNRARW-KTKQTEV- |            |
| SsHB44    | : MGRPPSTTGAPAFRFLPSEVAEEMEARLQQLNN---GIPSRGVLQI-ADKFSASPERAGKVALQPKQVWVWQFQNRARW-KTKQTEV- |            |
| SsHB78-1  | : MEGP-----FRFLPEEVKEMKRLFPVTS---RRLDHILMDE-AVKFSYFRGLAGMTPVKSKQVWVWQFQNRARW-KTKQTEV-      |            |
| SbHB27    | : MGRPPSTTGAPAFRFLPSEVAEEMEARLQQLNN---GIPSRGVLQI-ADKFSASPERAGKVALQPKQVWVWQFQNRARW-KTKQTEV- | WOX        |
| AT3G18380 | : MGRPPS-NGGPAFRFILPEVTEMAILLQHNH---AMPGRHILE-ADKFSASPERAGKVALQPKQVWVWQFQNRARW-KTKQTEV-    |            |
| SsHB9     | : -----PVRSRWTPKPEQILILIESIFNSGM---VNPPKDETVR-ARKLLER-----FGAVGDANFYWQFQNRARW-KTKQTEV-     |            |
| SsHB30    | : -----PVRSRWTPKPEQILILIESIFNSGM---VNPPKDETVR-ARKLLER-----FGAVGDANFYWQFQNRARW-KTKQTEV-     |            |
| SsHB55-1  | : -----DPKPRWNPRPEQIRITAEIFNSGM---INPPRDEIPR-ARMRLQE-----YGQVGDANFYWQFQNRARW-KTKQTEV-      | WOX        |
| SsHB57-1  | : -----LANARWNPTKEQVAVIEGLYEHGL---RTPSAEQIQI-TGRLRE-----HGATEGKNFYWQFQNRARW-KTKQTEV-       |            |
| SsHB82-1  | : -----TARSRWAPKPEQILILIESIFNSGM---VNPAKDETAR-ARKLLER-----FGAVGDANFYWQFQNRARW-KTKQTEV-     |            |
| SbHB42    | : -----DPKPRWNPRPEQIRITAEIFNSGM---INPPRDEIPR-ARMRLQE-----YGQVGDANFYWQFQNRARW-KTKQTEV-      |            |
| AT1G20710 | : -----STRPRWPTPTTQLOIENIYKEGS---GTPNPRRIKE-TMELSE-----HGQIMEKNFYWQFQNRARW-KTKQTEV-        |            |

L

WF N R

Supplementary Figure S3 Sequence alignment of HD domain of representative HB proteins in each subfamily of *S. spontaneum*, *S. bicolor*, and *A. thaliana*
