# Supplementary material for: Expression Profiling and MicroRNA Regulatory Networks of Homeobox Family Genes in Sugarcane Saccharum spontaneum L.
Source: MDPI journal article supplement (doi:10.3390/ijms23158724), 2022-08-05
Supplement: s1 [file s1]

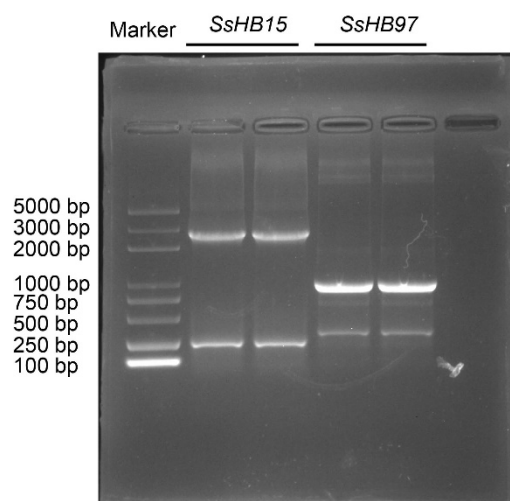

Supplementary Figure S8 The original image of 1% agarose gel electrophoresis of PCR clones of *SsHB15* and *SsHB97* coding sequences
