# Supplementary material for: Expression Profiling and MicroRNA Regulatory Networks of Homeobox Family Genes in Sugarcane Saccharum spontaneum L.
Source: MDPI journal article supplement (doi:10.3390/ijms23158724), 2022-08-05
Supplement: s1 [file s1]

A

HD-ZIP I

HD-ZIP II

DDT

PLINC

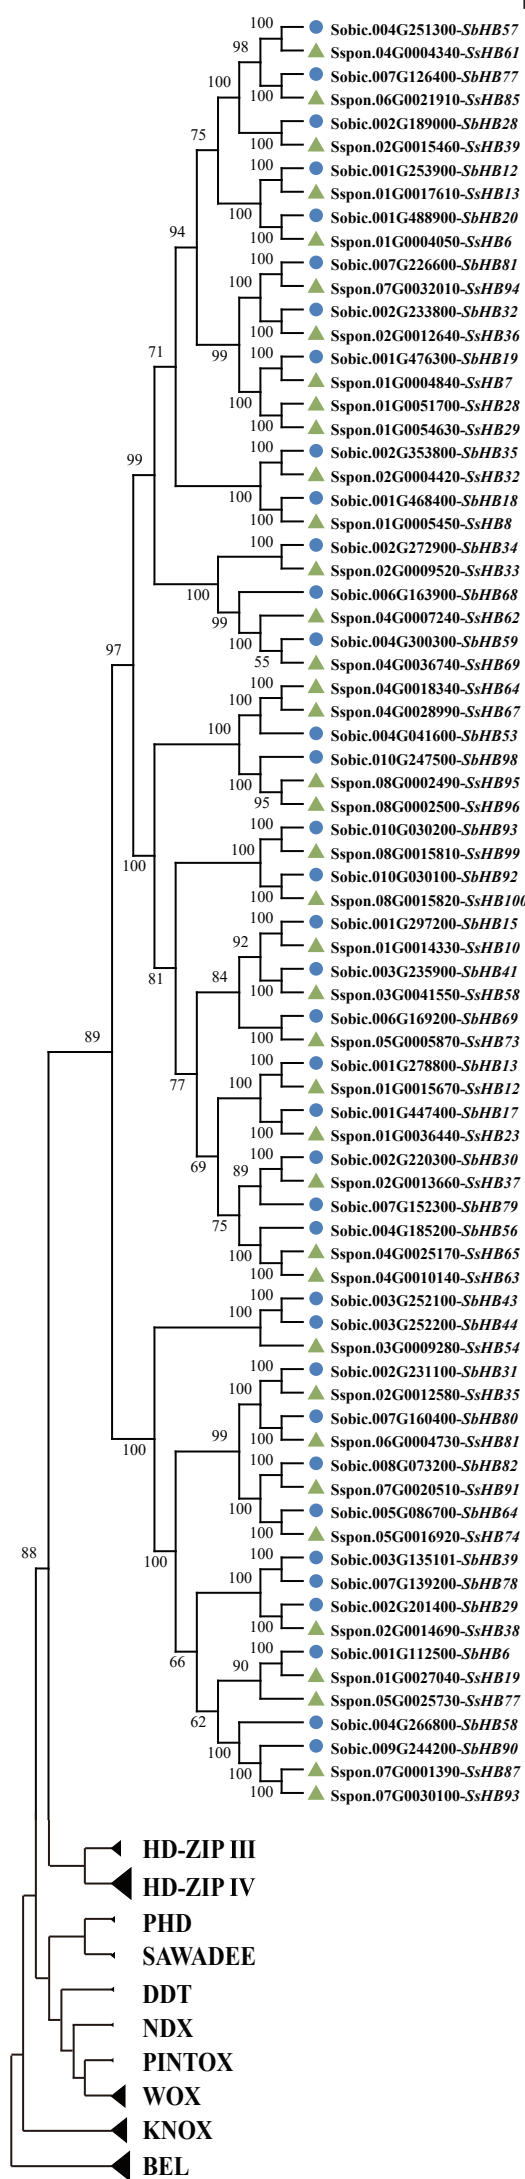

B

UTR CDS

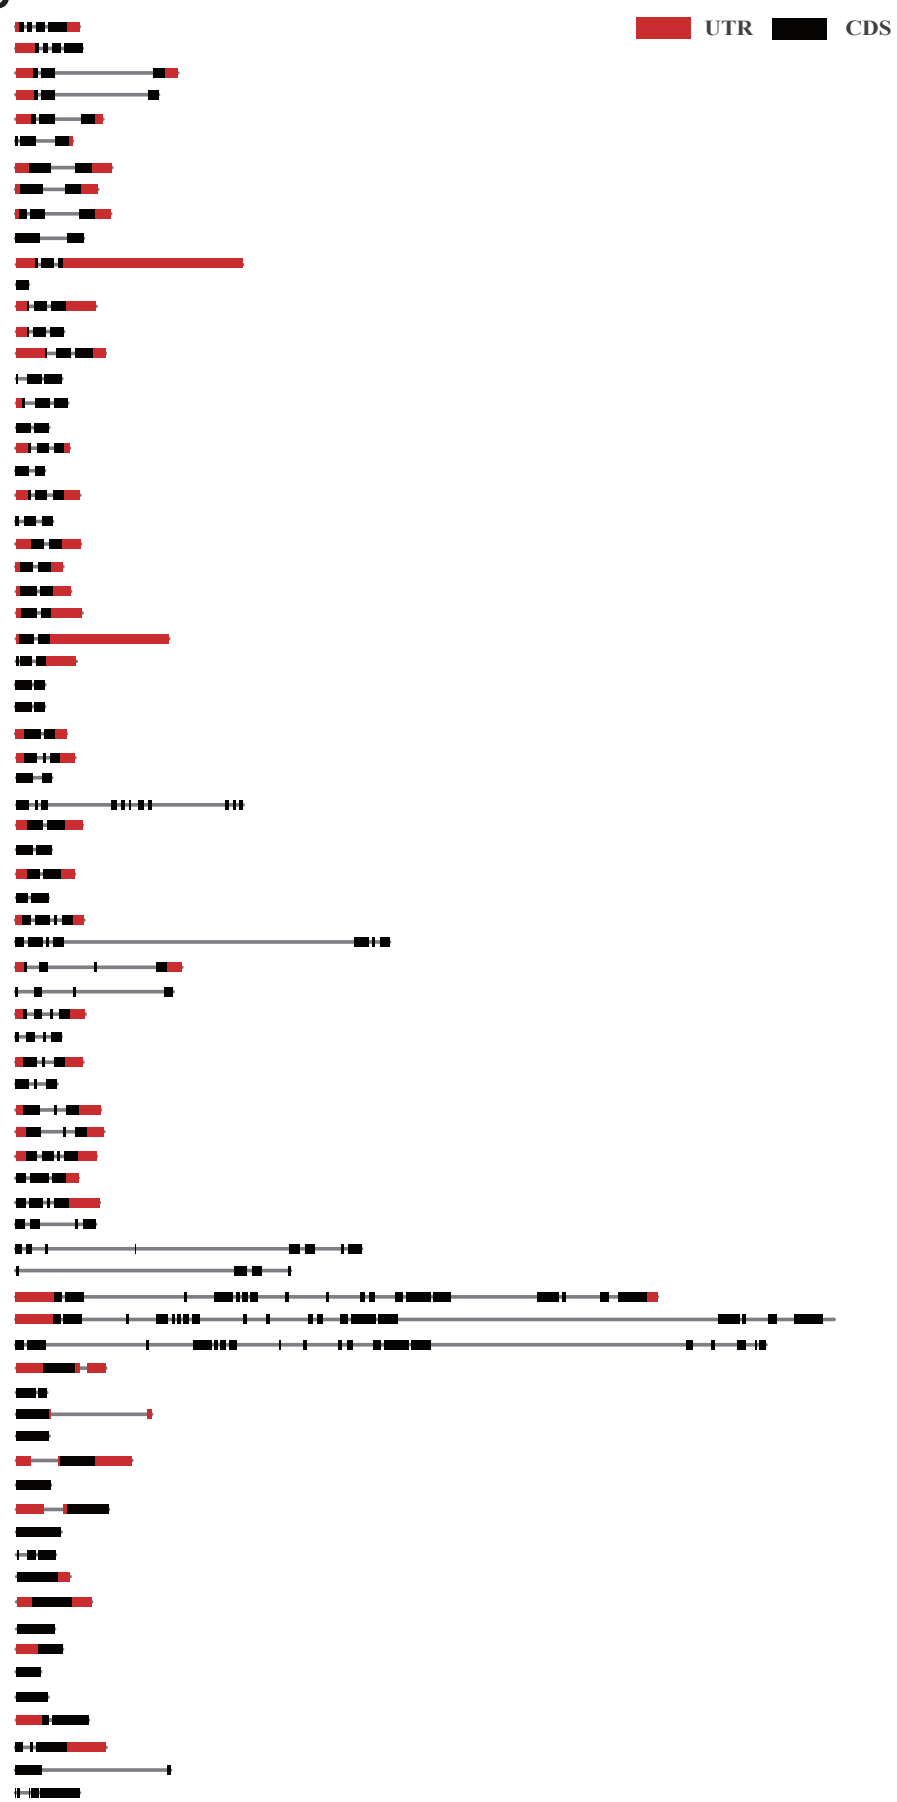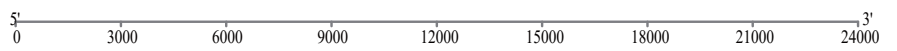

A

HD-ZIP III

HD-ZIP IV

PHD SAWADEE NDX PINTOX

WOX

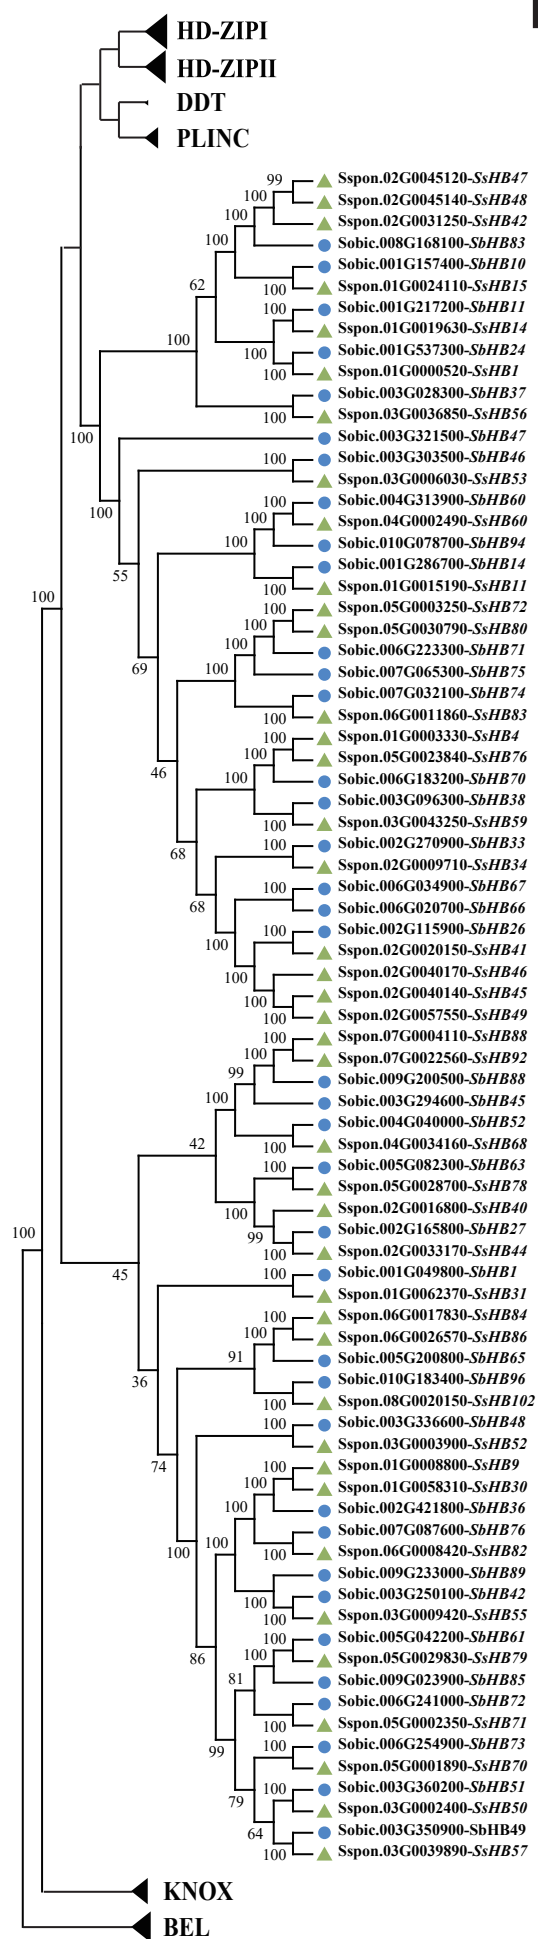

B

UTR CDS

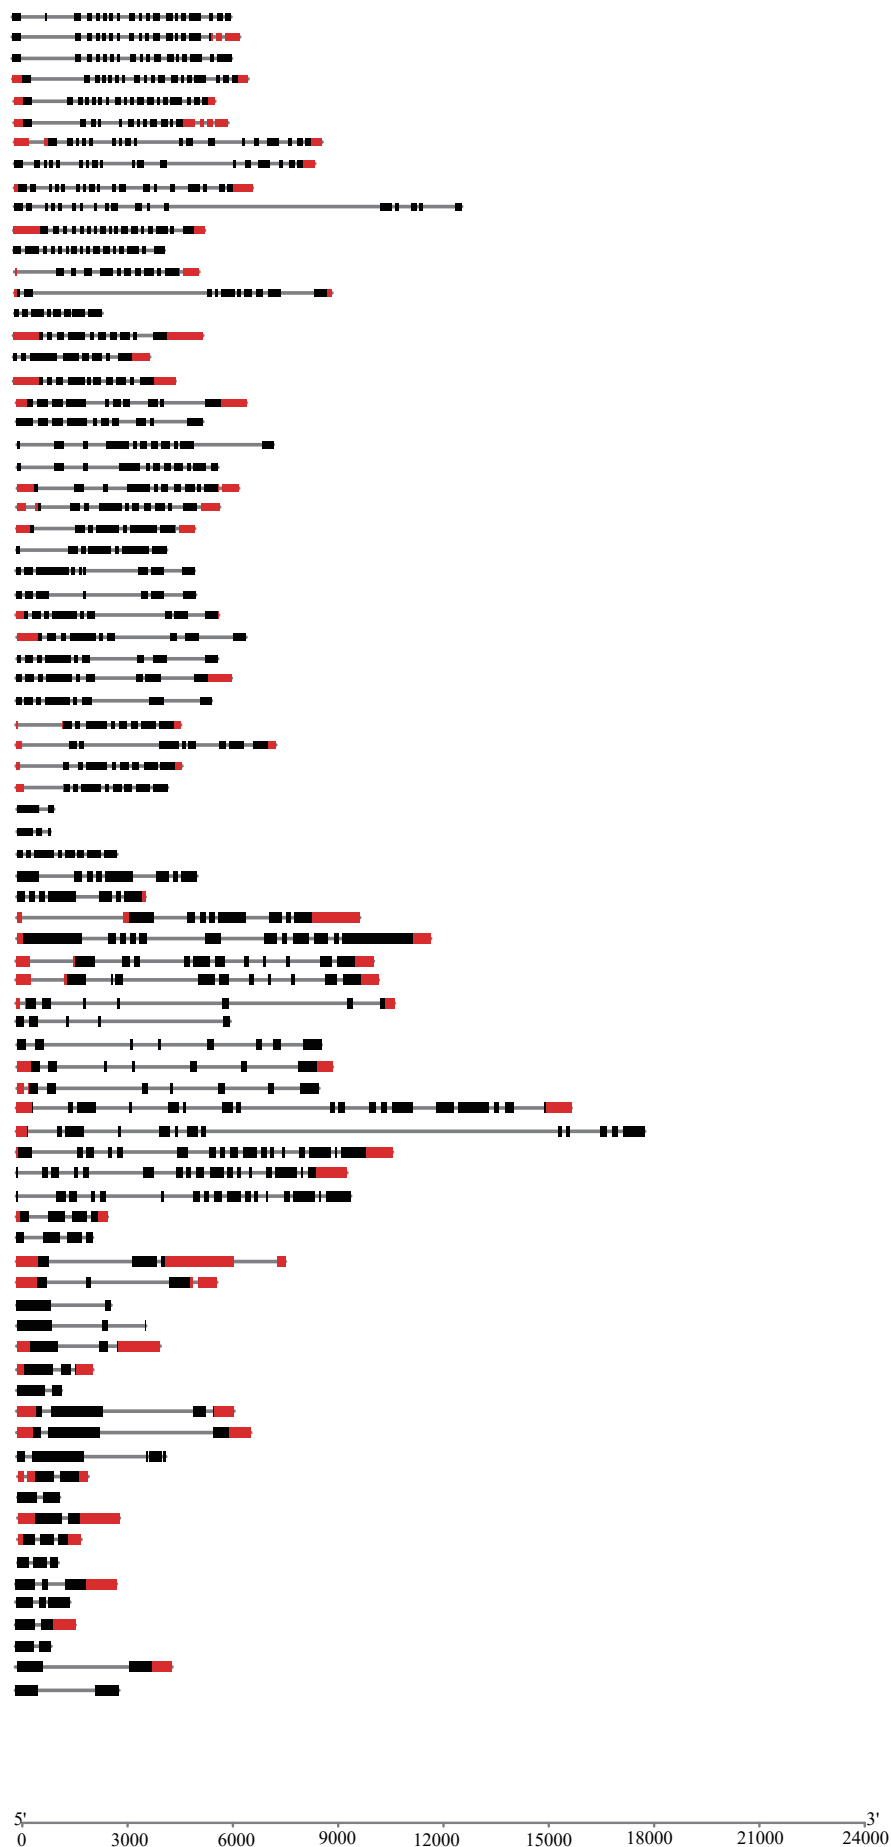

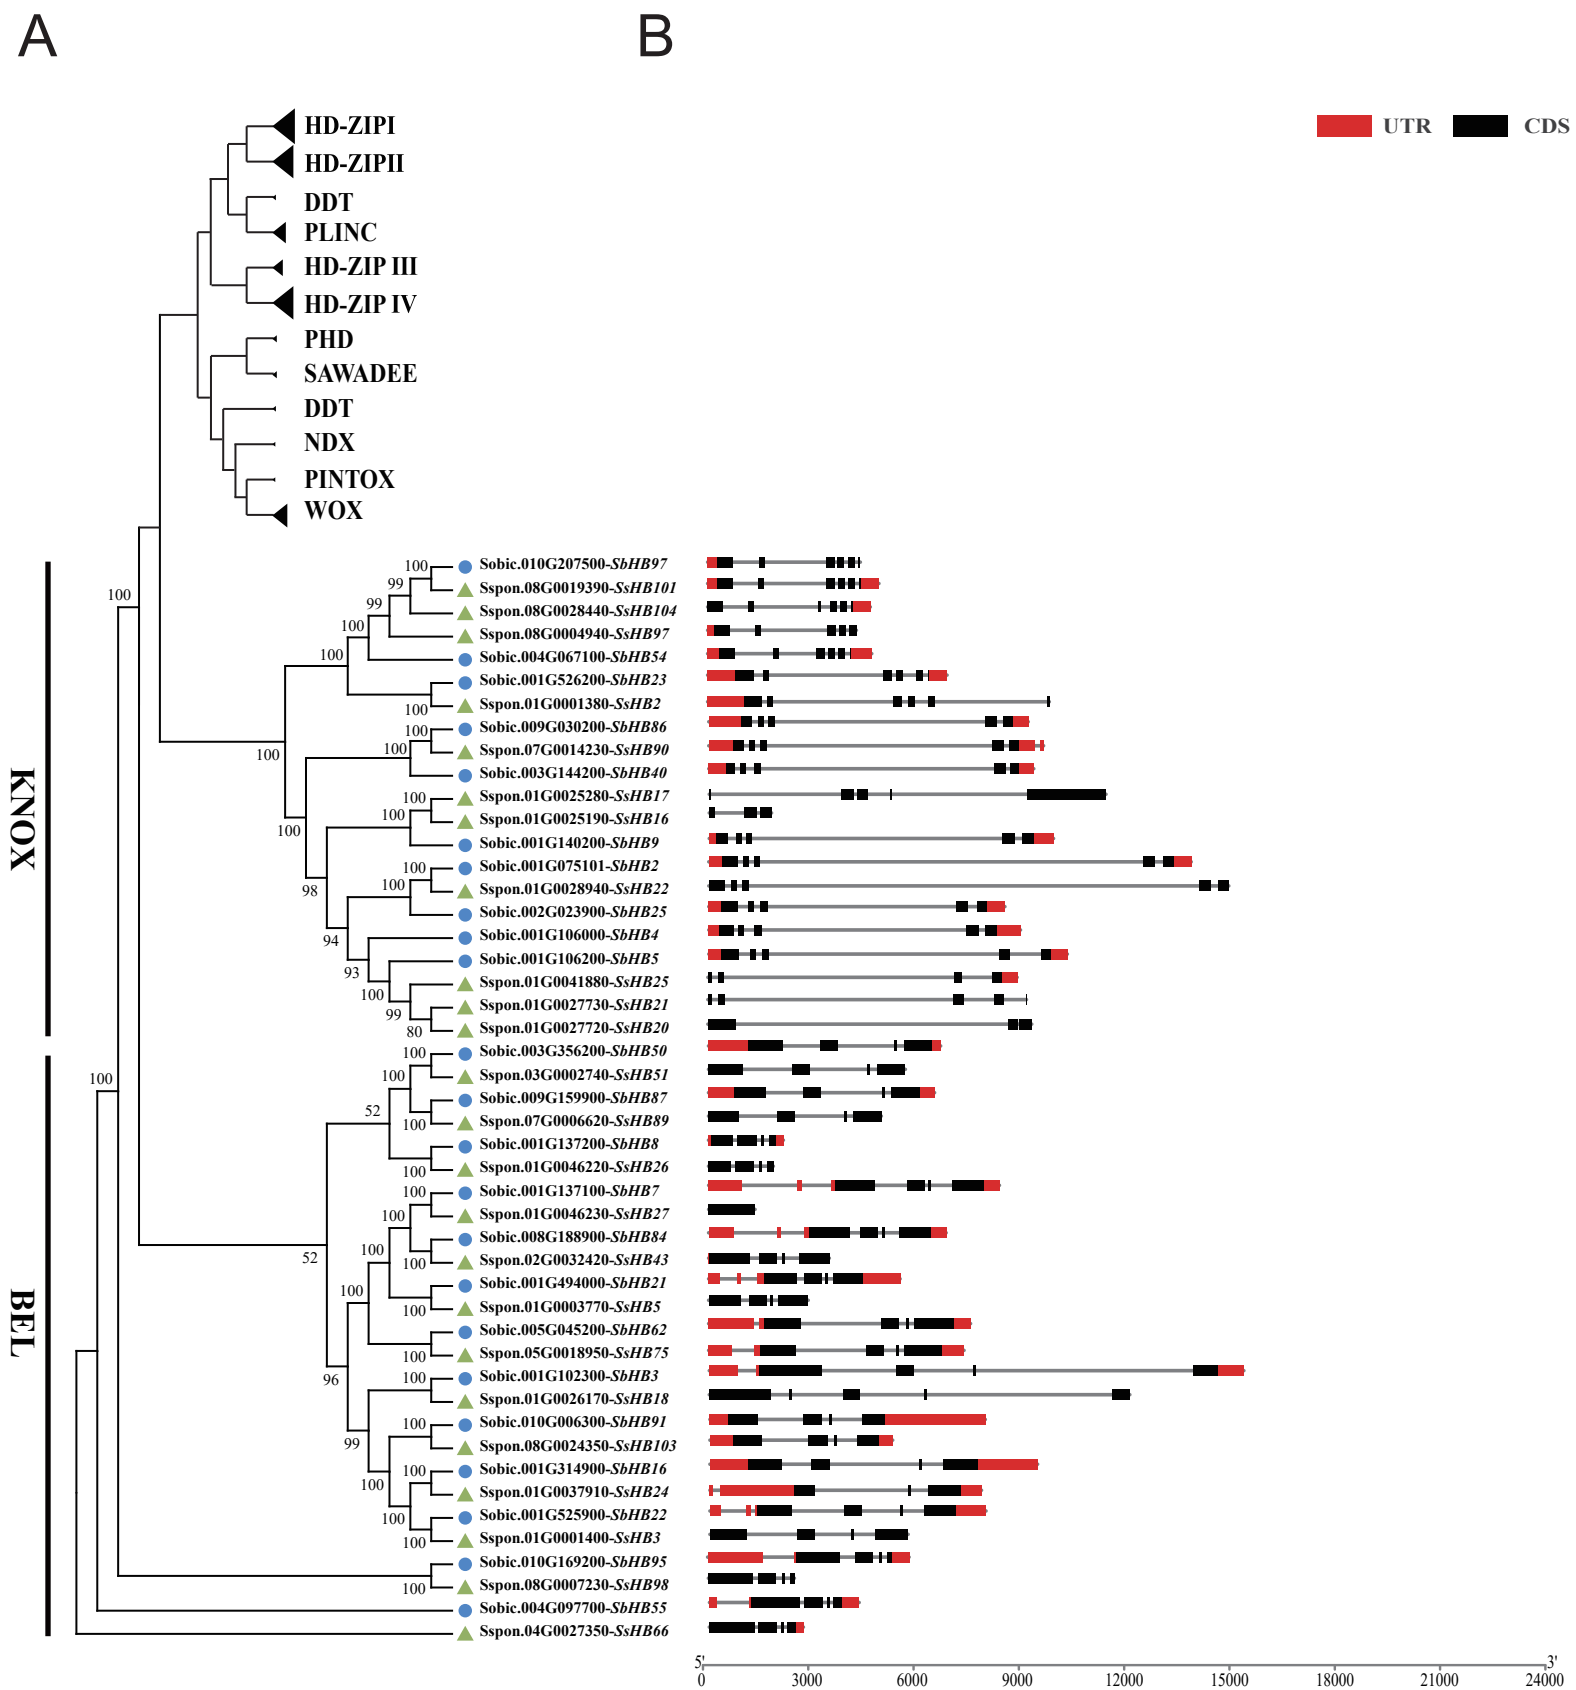

Supplementary Figure S4 Comparison of exon-intron structure of the *HBs* between *S. spontaneum* and *S. bicolor*. (A) Phylogenetic relationship of *SsHBs* and *SbHBs*, the tree was generated using the ML method in iq-tree with 1000 bootstrap replicates. (B) exon-intron structures of *SsHBs* and *SbHBs*
