# Supplementary material for: Expression Profiling and MicroRNA Regulatory Networks of Homeobox Family Genes in Sugarcane Saccharum spontaneum L.
Source: MDPI journal article supplement (doi:10.3390/ijms23158724), 2022-08-05
Supplement: s1 [file s1]

**A**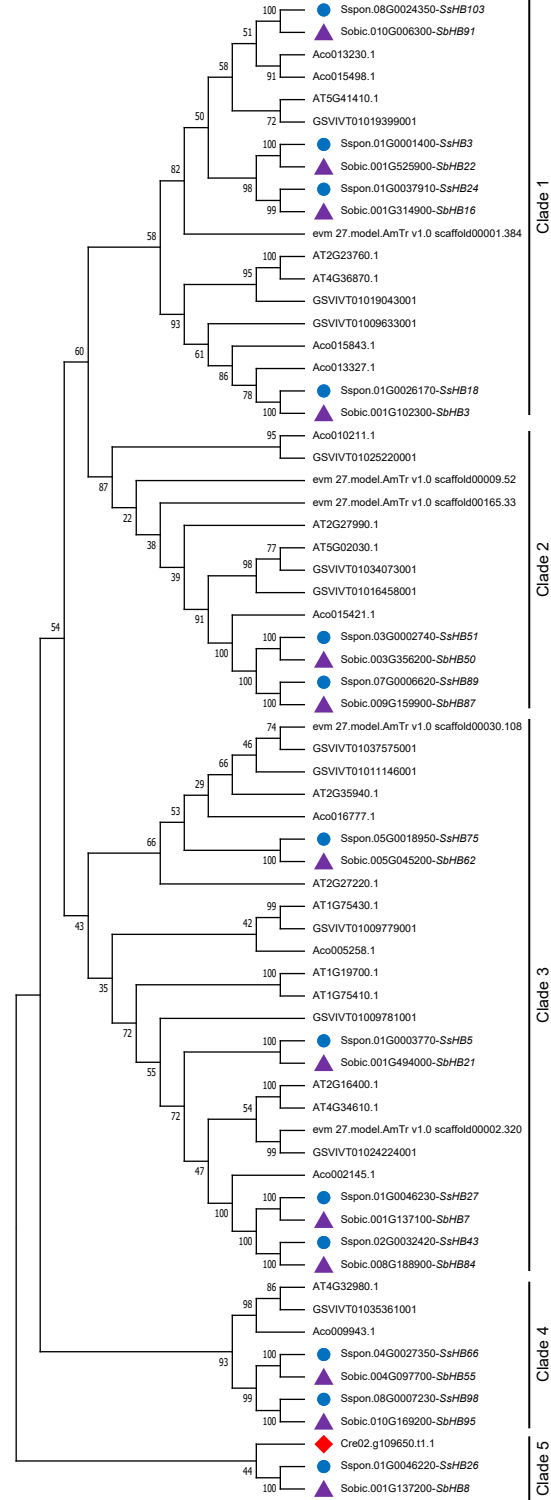**B**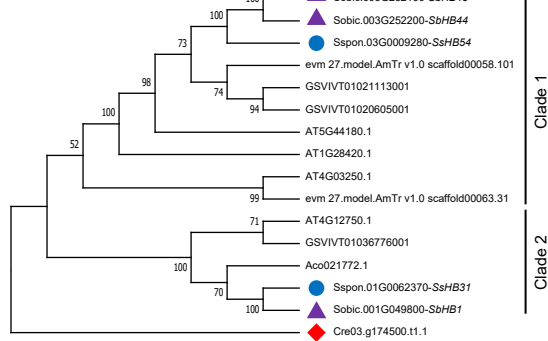**C**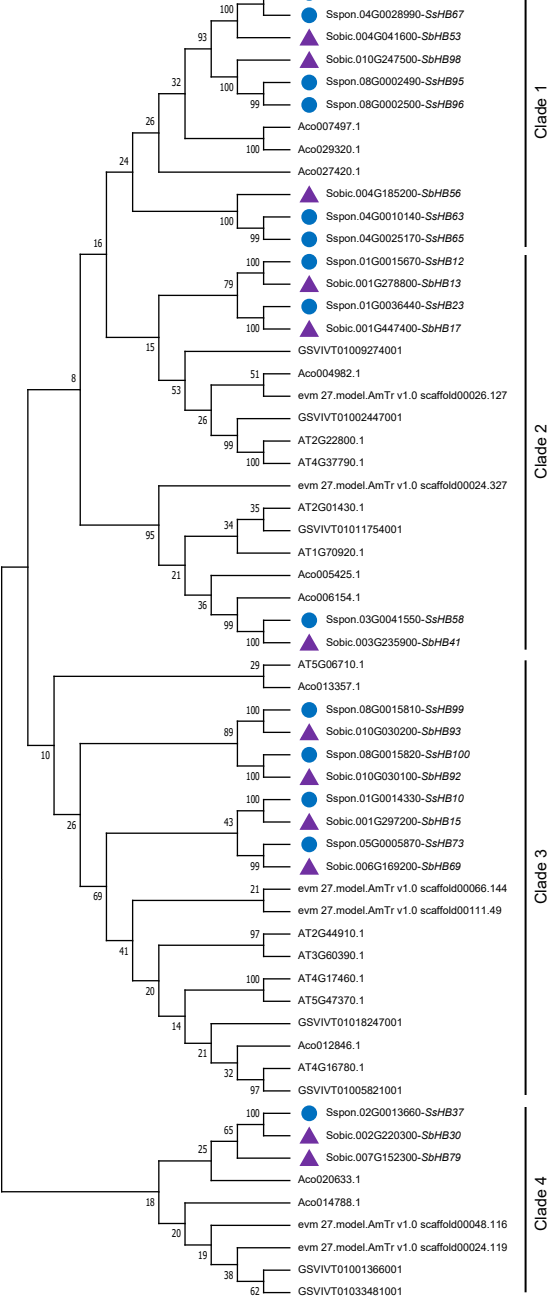

D

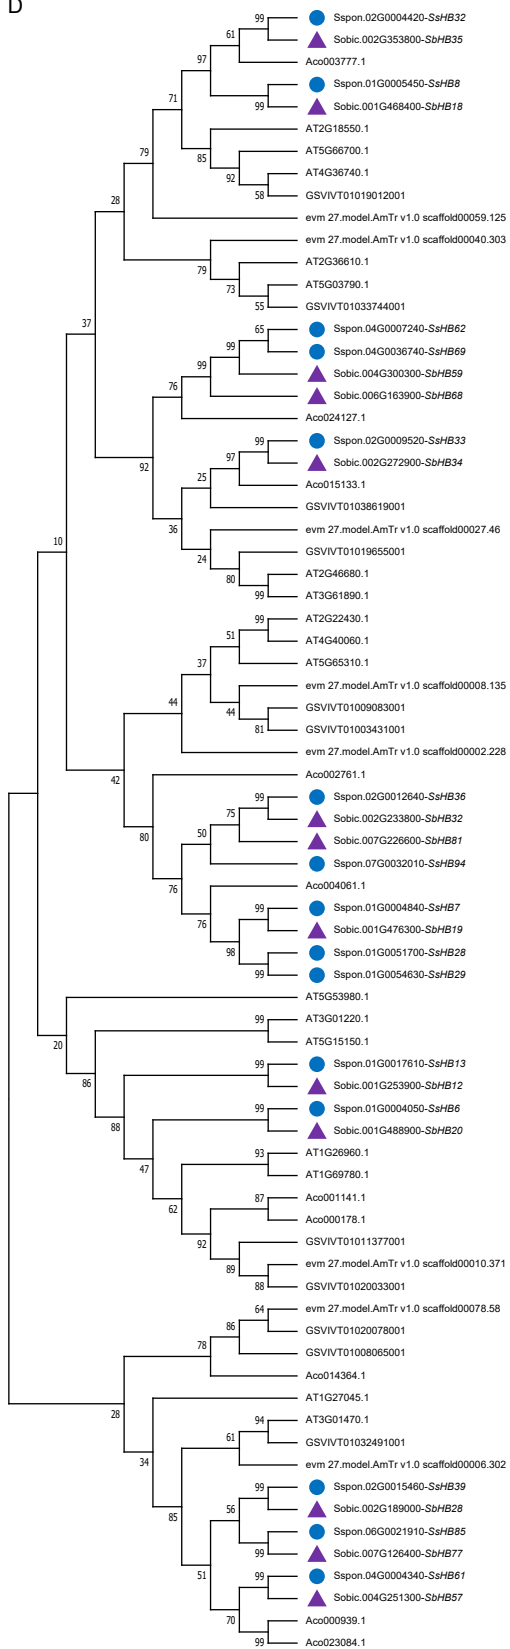

E

Clade 1

Clade 2

Clade 3

Clade 4

Clade 1

Clade 2

Clade 3

Clade 4

● *Saccharum spontaneum* ▲ *Sorghum bicolor* ◆ *Chlamydomonas reinhardtii*

F

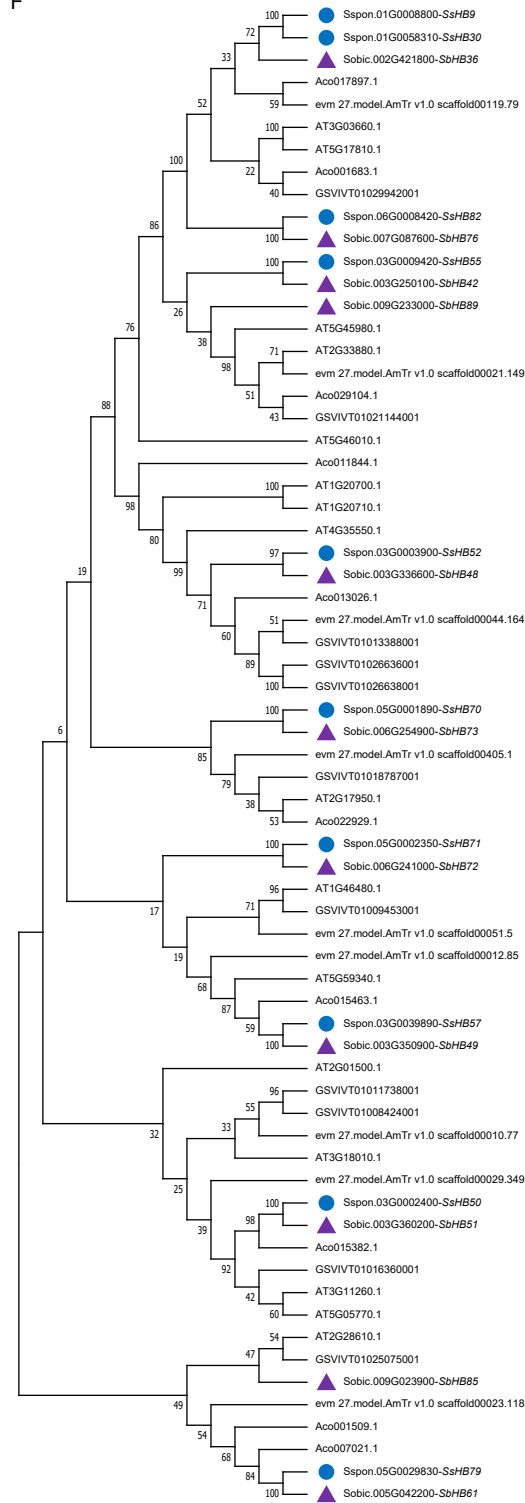

G

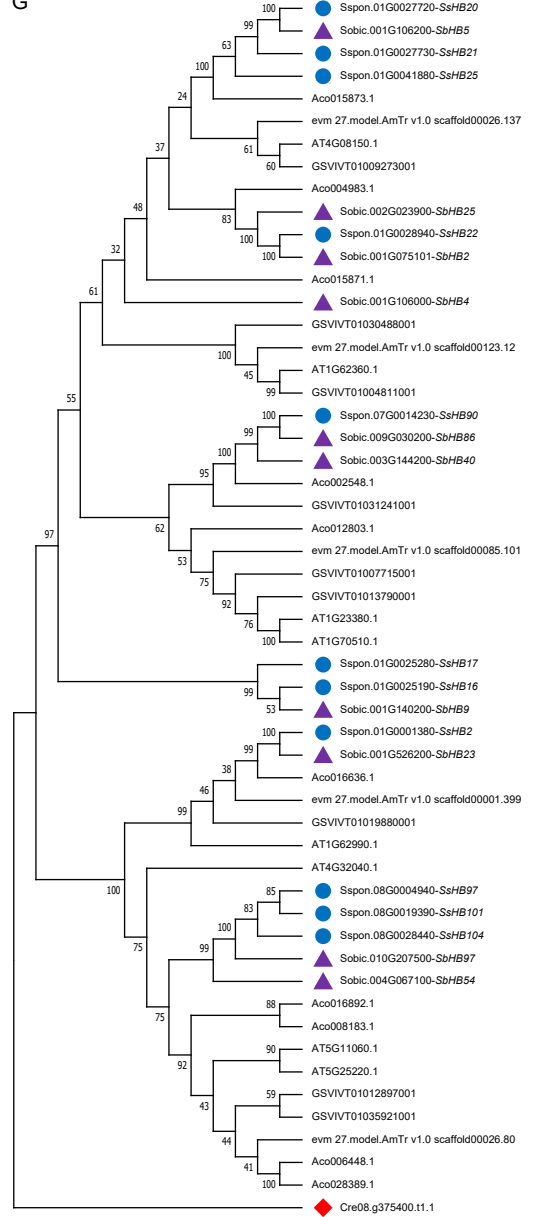

H

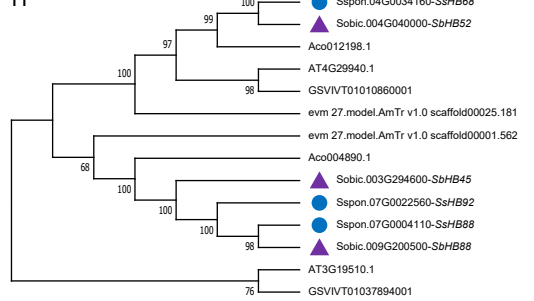

● *Saccharum spontaneum* ▲ *Sorghum bicolor* ◆ *Chlamydomonas reinhardtii*

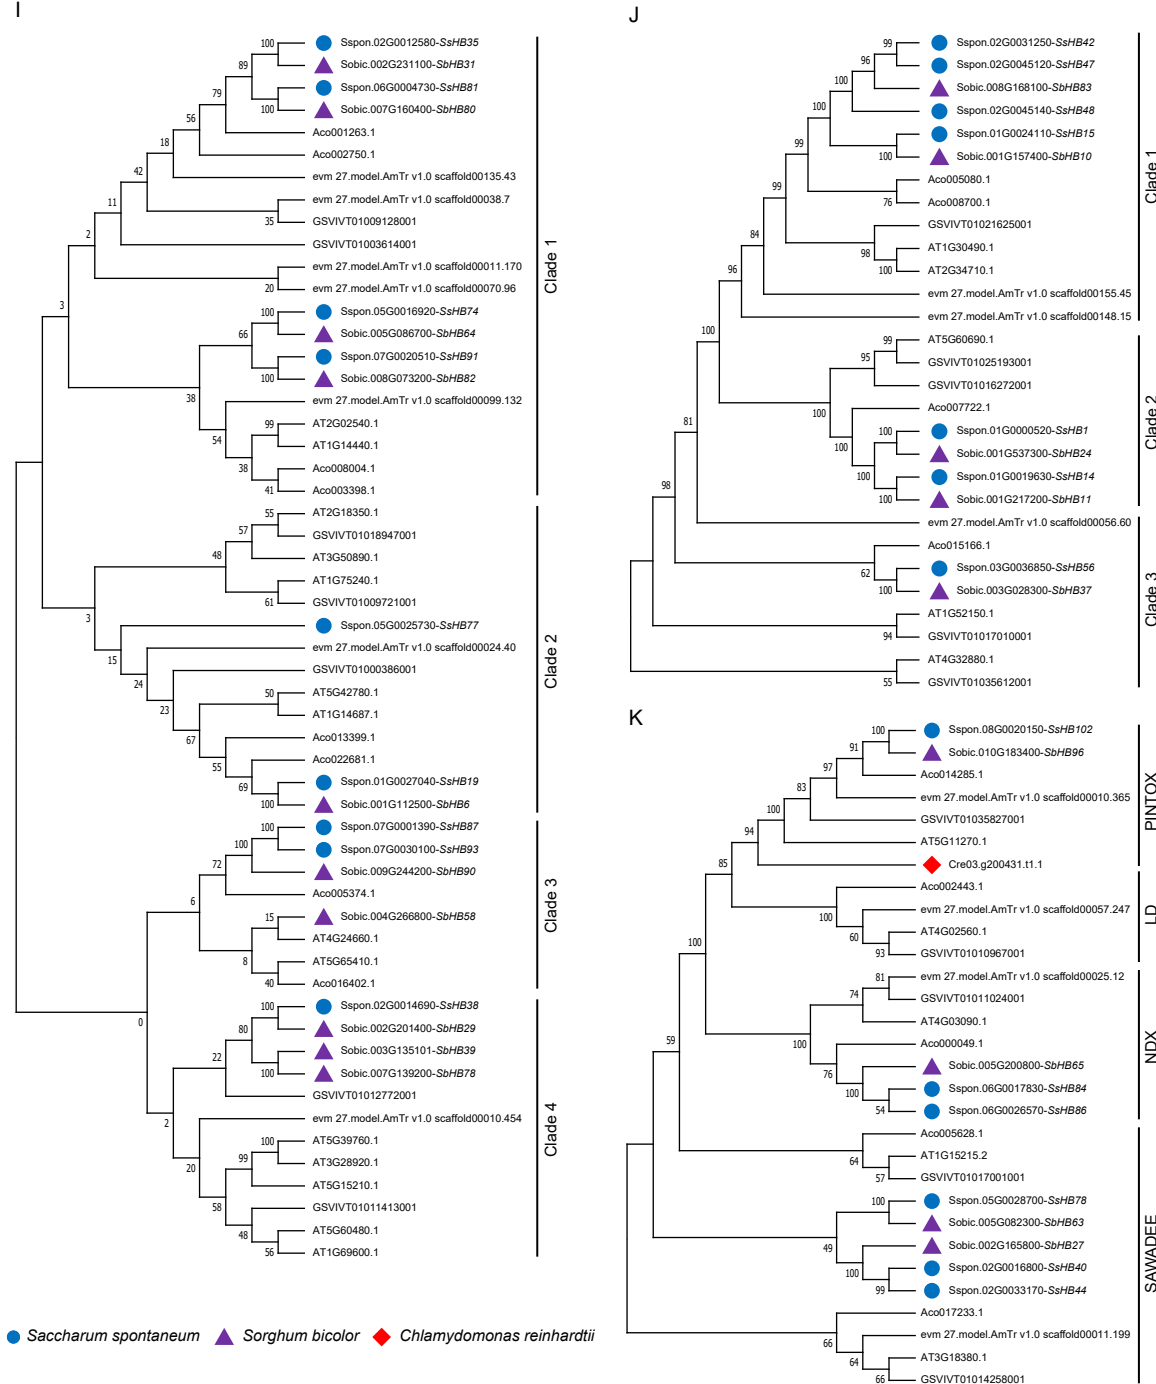

Supplementary Figure S2 Phylogenetic tree of HB subfamilies among representative monocotyledons and dicotyledons. The phylogenetic trees were built with the NJ algorithm for BEL (A), DDT (B), HD-ZIP II (C), HD-ZIP I (D), HD-ZIP IV (E), WOX (F), KNOX (G), PHD (H), PLINC (I), HD-ZIP III (J), LD, SAWADEE, NDX and PINTOX (K)
