# Supplementary material for: Expression Profiling and MicroRNA Regulatory Networks of Homeobox Family Genes in Sugarcane Saccharum spontaneum L.
Source: MDPI journal article supplement (doi:10.3390/ijms23158724), 2022-08-05
Supplement: s1 [file s1]

A

HD-ZIP I

HD-ZIP II

DDT

PLINC

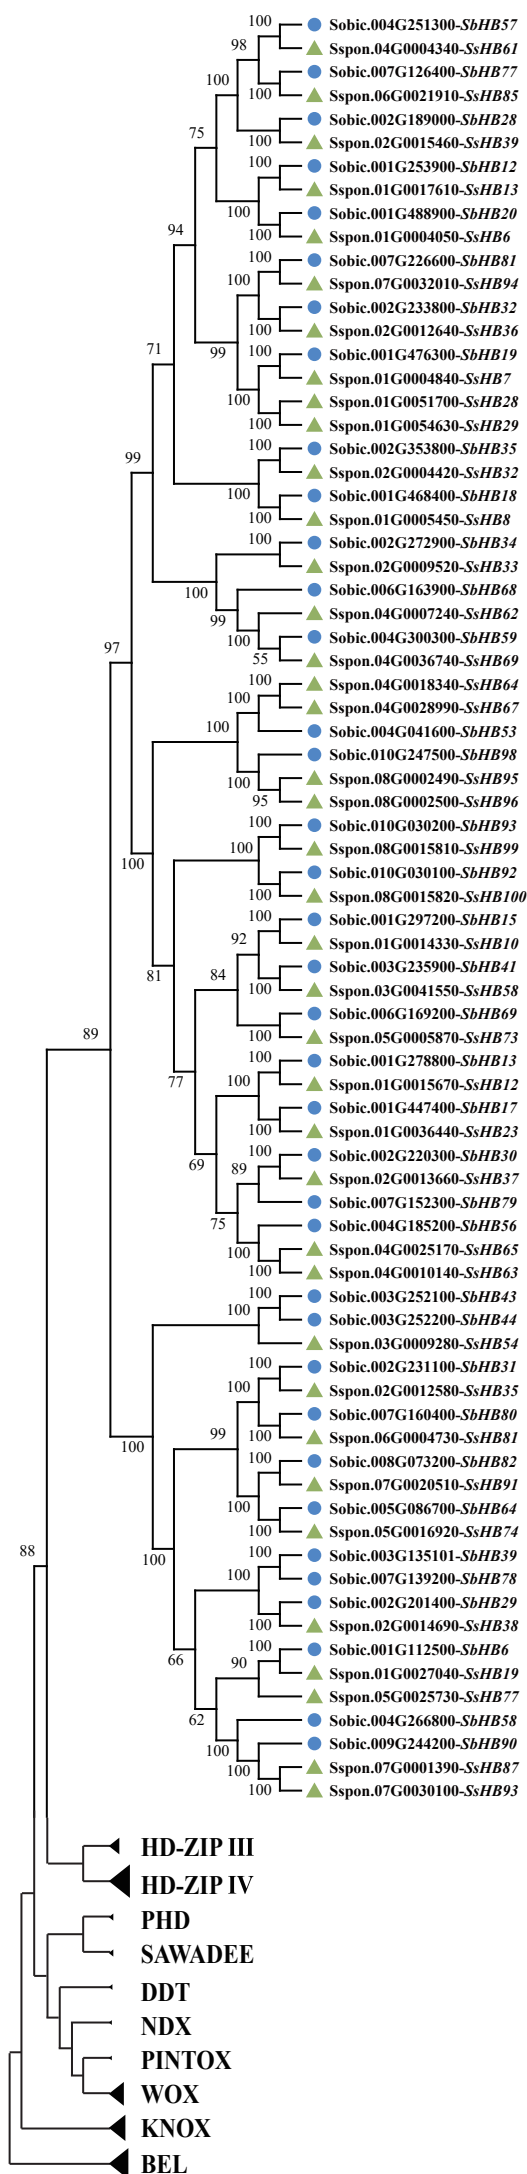

B

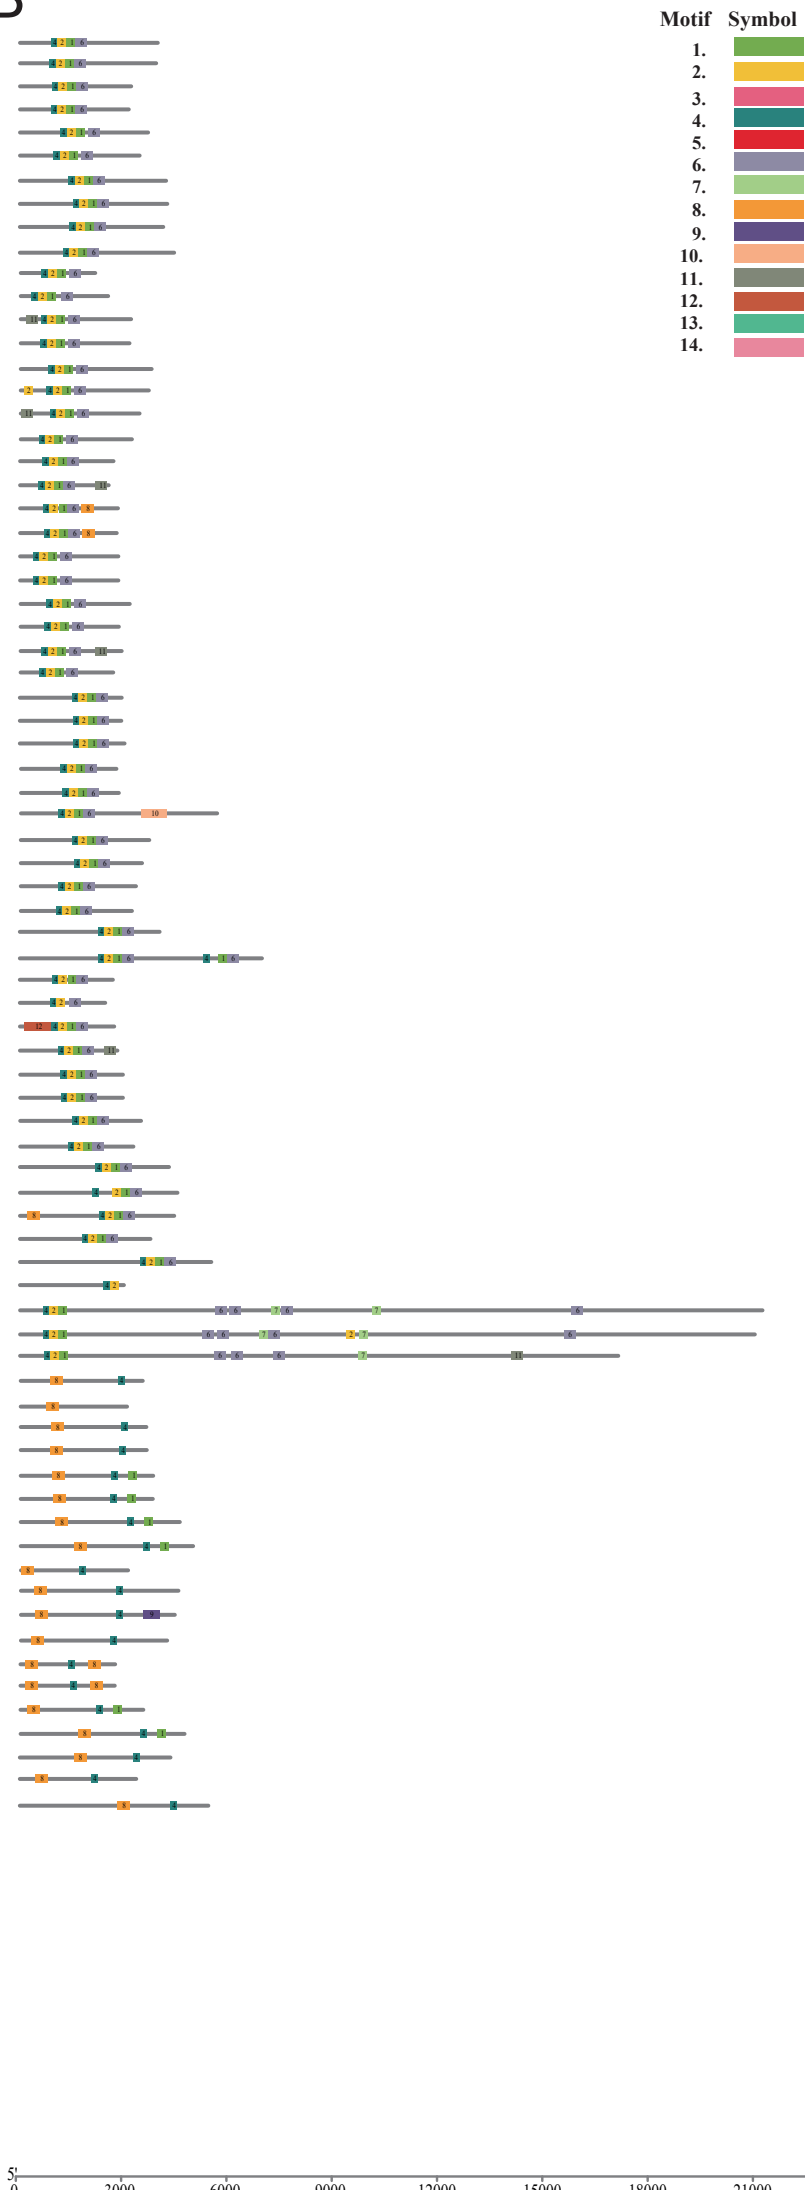

A

HD-ZIP III

HD-ZIP IV

PHD SAWADEE NDX PINTOX

WOX

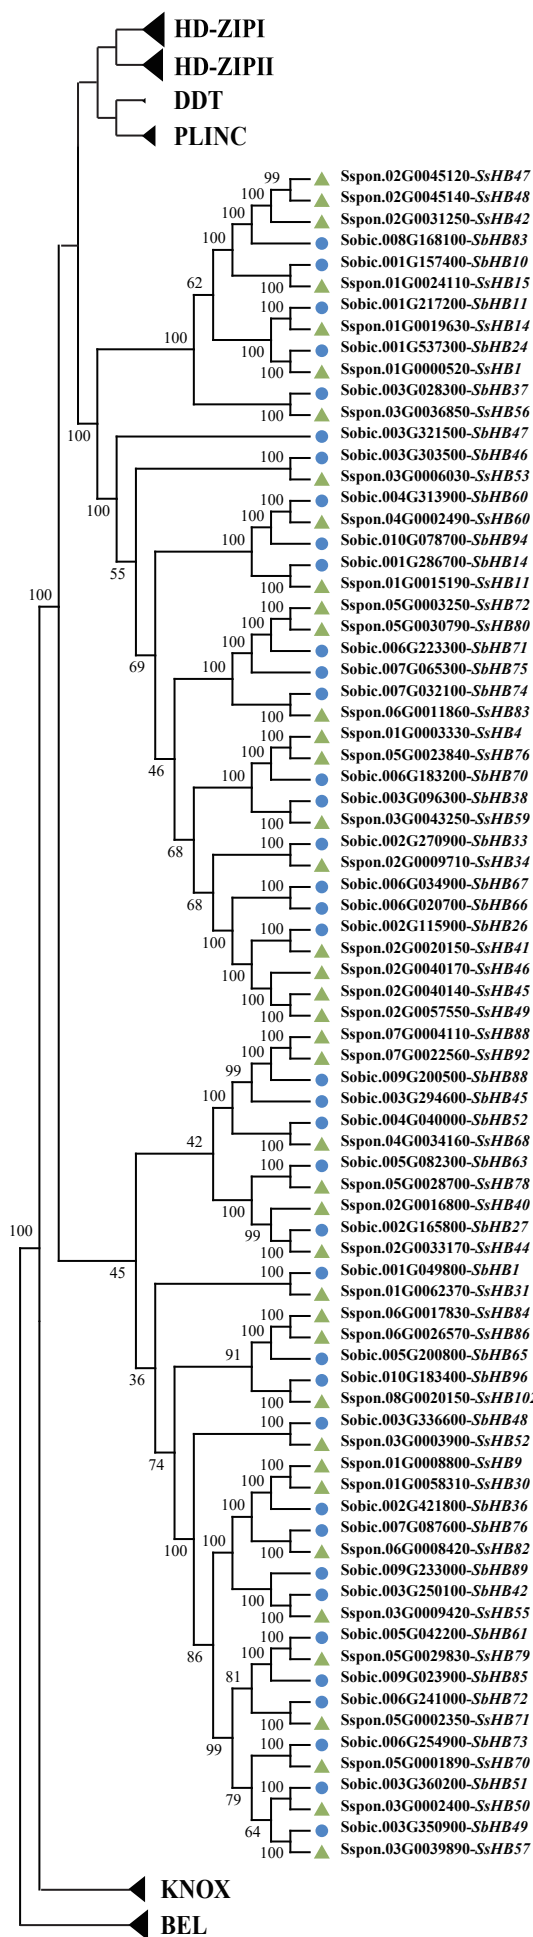

B

Motif Symbol

1.
2.
3.
4.
5.
6.
7.
8.
9.
10.
11.
12.
13.
14.

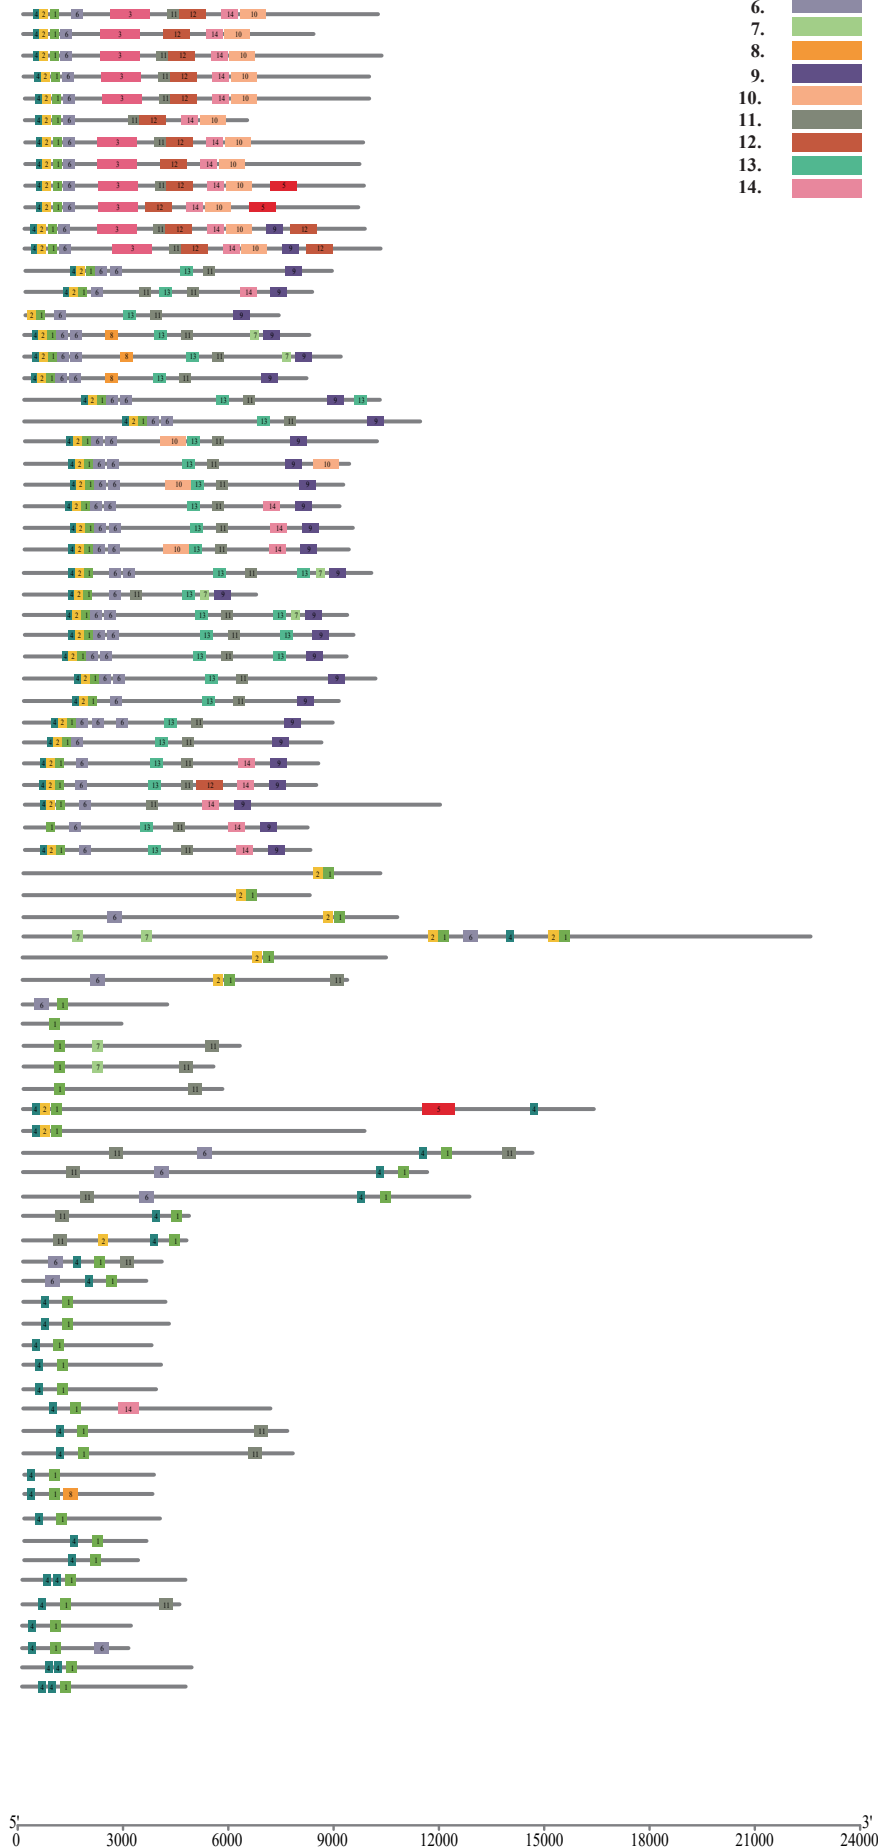

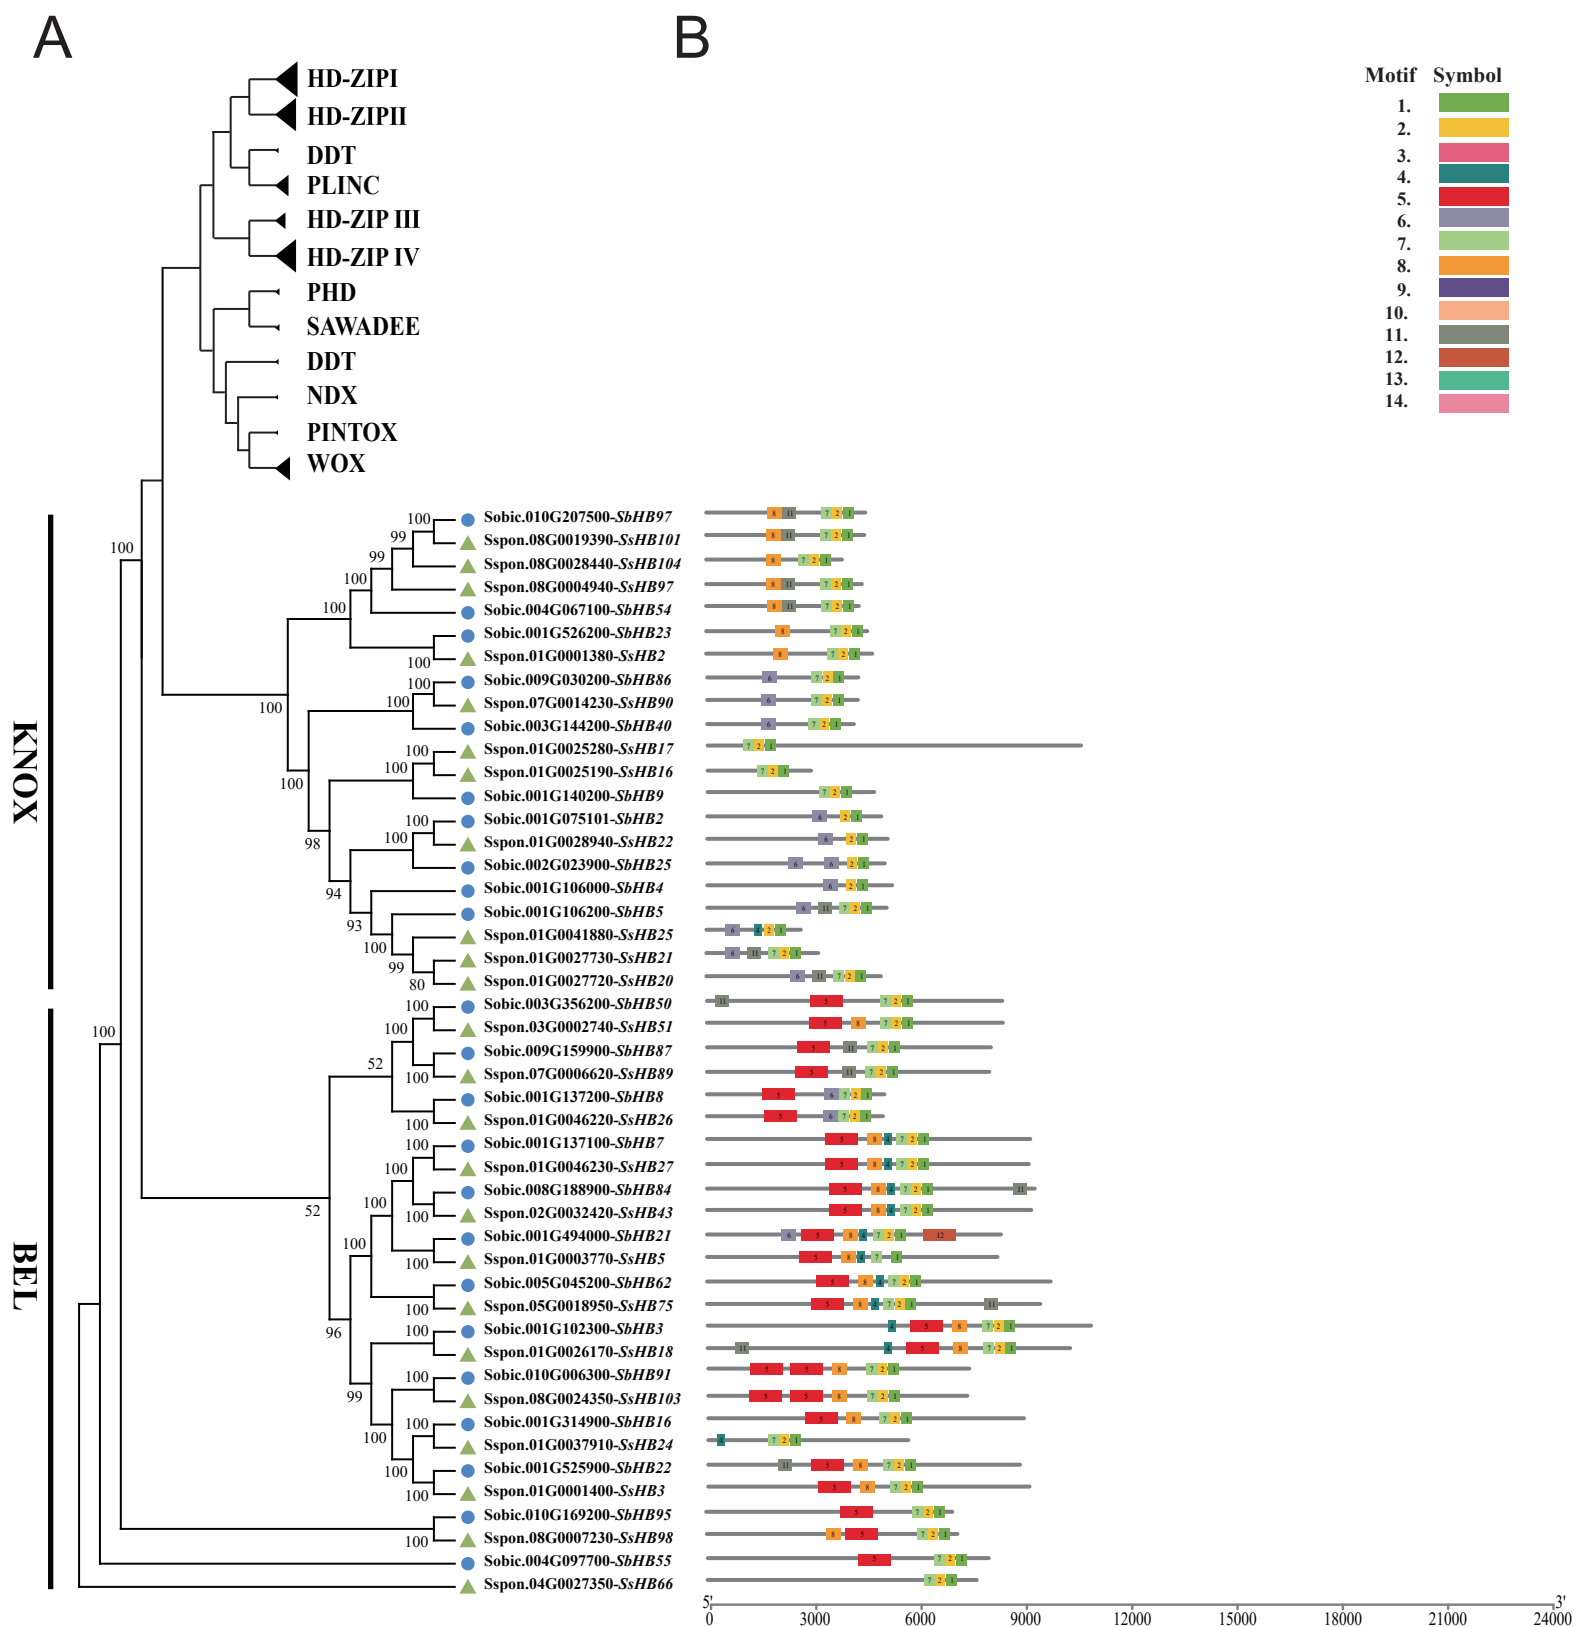

Supplementary Figure S5 Architecture of conserved motifs in HBs between *S. spontaneum* and *S. bicolor*. (A) The ML tree was generated in iq-tree with 1000 bootstrap replicates. (B) Motif analysis of SsHBs and SbHBs. The numbers 1-14 of motifs are displayed in different color boxes
