# Supplementary material for: Expression Profiling and MicroRNA Regulatory Networks of Homeobox Family Genes in Sugarcane Saccharum spontaneum L
Source: Int J Mol Sci. 2022 Aug 5;23(15):8724. doi: 10.3390/ijms23158724 (PMC9369071; doi:10.3390/ijms23158724)
Supplement: Supplementary file 1 [file ijms-23-08724-s001.zip]

Archive with 17 entries (17 files):
- Supplementary file 1.xlsx
- Supplementary file 10.xlsx
- Supplementary file 11.xlsx
- Supplementary file 12.xlsx
- Supplementary file 13.xlsx
- Supplementary file 14.pdf
- Supplementary file 15.pdf
- Supplementary file 16.pdf
- Supplementary file 17.xlsx
- Supplementary file 2.xlsx
- Supplementary file 3.xlsx
- Supplementary file 4.pdf
- Supplementary file 5.pdf
- Supplementary file 6.pdf
- Supplementary file 7.pdf
- Supplementary file 8.pdf
- Supplementary file 9.xlsx
