# Supplementary material for: Expression Profiling and MicroRNA Regulatory Networks of Homeobox Family Genes in Sugarcane Saccharum spontaneum L
Source: Int J Mol Sci. 2022 Aug 5;23(15):8724. doi: 10.3390/ijms23158724 (PMC9369071; doi:10.3390/ijms23158724)
Supplement: Supplementary file 1 [file ijms-23-08724-s001.zip › Supplementary file 1.xlsx]

## Sheet: Sheet2
Supplementary Table S1 Detailed annotation and prediction of subcellular localization of SsHB alleles
1. Naming of sugarcane HB genes based on genomic location
2. Representive Gene models: the most conserved allele comparing to the monoploid genome was chosen as the representive gene model (RGM)
3. Sorghum gene ID. This the homologous genes in Sorghum genome
4. Allele ID: based on homologs A to D
Note: tandem duplicated (T)and dispersely duplicated (P) paralogs are seperated by "|" followed possibly ancestor gene
Gene name	Representive Gene model	Sorghum homologs ID	Allele A	Allele B	Allele C	Allele D	subcellular localization
SsHB1	Sspon.01G0000520	Sobic.001G537300	Sspon.01G0000520-1A	Sspon.01G0000520-2B	Sspon.01G0000520-3C|Sspon.01G0000520-1P		Nucleus
SsHB2	Sspon.01G0001380	Sobic.001G526200	Sspon.01G0001380-1A|Sspon.01G0001380-1P|Sspon.01G0001380-2P			Sspon.01G0001380-2D	Nucleus
SsHB3	Sspon.01G0001400	Sobic.001G525900	Sspon.01G0001400-1A|Sspon.01G0001400-1P	Sspon.01G0001400-2B	Sspon.01G0001400-3C|Sspon.01G0001400-2P	Sspon.01G0001400-4D|Sspon.01G0001400-3P|Sspon.01G0001400-4P	Nucleus
SsHB4	Sspon.01G0003330	NA	Sspon.01G0003330-1A				Nucleus
SsHB5	Sspon.01G0003770	Sobic.001G494000	Sspon.01G0003770-1A	Sspon.01G0003770-2B	Sspon.01G0003770-3C	Sspon.01G0003770-4D|Sspon.01G0003770-1P	Nucleus
SsHB6	Sspon.01G0004050	Sobic.001G488900	Sspon.01G0004050-1A				Nucleus
SsHB7	Sspon.01G0004840	Sobic.001G476300	Sspon.01G0004840-1A		Sspon.01G0004840-2C	Sspon.01G0004840-3D	Nucleus
SsHB8	Sspon.01G0005450	Sobic.001G468400	Sspon.01G0005450-1A	Sspon.01G0005450-2B		Sspon.01G0005450-3D	Nucleus
SsHB9	Sspon.01G0008800	Sobic.002G421800	Sspon.01G0008800-1A				Nucleus
SsHB10	Sspon.01G0014330	Sobic.001G297200	Sspon.01G0014330-1A				Nucleus
SsHB11	Sspon.01G0015190	Sobic.001G286700	Sspon.01G0015190-1A	Sspon.01G0015190-2B	Sspon.01G0015190-3C	Sspon.01G0015190-4D	Nucleus
SsHB12	Sspon.01G0015670	Sobic.001G278800	Sspon.01G0015670-1A	Sspon.01G0015670-2B	Sspon.01G0015670-3C	Sspon.01G0015670-4D	Nucleus
SsHB13	Sspon.01G0017610	Sobic.001G253900	Sspon.01G0017610-1A	Sspon.01G0017610-2B	Sspon.01G0017610-3C	Sspon.01G0017610-4D|Sspon.01G0017610-1P	Nucleus
SsHB14	Sspon.01G0019630	Sobic.001G217200	Sspon.01G0019630-1A|Sspon.01G0019630-1P	Sspon.01G0019630-2B	Sspon.01G0019630-3C	Sspon.01G0019630-4D	Nucleus
SsHB15	Sspon.01G0024110	Sobic.001G157400	Sspon.01G0024110-1A	Sspon.01G0024110-2B	Sspon.01G0024110-3C	Sspon.01G0024110-4D	Nucleus
SsHB16	Sspon.01G0025190	Sobic.001G140200	Sspon.01G0025190-1A		Sspon.01G0025190-2C		Nucleus
SsHB17	Sspon.01G0025280	Sobic.001G140200	Sspon.01G0025280-1A|Sspon.01G0025280-1T				Nucleus
SsHB18	Sspon.01G0026170	Sobic.001G102300	Sspon.01G0026170-1A	Sspon.01G0026170-2B		Sspon.01G0026170-3D	Nucleus
SsHB19	Sspon.01G0027040	Sobic.001G112500	Sspon.01G0027040-1A|Sspon.01G0027040-1P			Sspon.01G0027040-2D	Nucleus
SsHB20	Sspon.01G0027720	Sobic.001G106200	Sspon.01G0027720-1A	Sspon.01G0027720-2B			Nucleus
SsHB21	Sspon.01G0027730	Sobic.001G106200	Sspon.01G0027730-1A		Sspon.01G0027730-2C	Sspon.01G0027730-3D	Nucleus
SsHB22	Sspon.01G0028940	Sobic.001G075101	Sspon.01G0028940-1A|Sspon.01G0028940-1P	Sspon.01G0028940-2B|Sspon.01G0028940-2P|Sspon.01G0028940-3P	Sspon.01G0028940-3C	Sspon.01G0028940-4D|Sspon.01G0028940-4P	Nucleus
SsHB23	Sspon.01G0036440	Sobic.001G447400		Sspon.01G0036440-1B|Sspon.01G0036440-1P	Sspon.01G0036440-2C	Sspon.01G0036440-3D|Sspon.01G0036440-2P	Nucleus
SsHB24	Sspon.01G0037910	Sobic.001G314900		Sspon.01G0037910-1B			Nucleus
SsHB25	Sspon.01G0041880	Sobic.001G106200		Sspon.01G0041880-1B			Nucleus
SsHB26	Sspon.01G0046220	Sobic.001G137200		Sspon.01G0046220-1B	Sspon.01G0046220-2C		Nucleus
SsHB27	Sspon.01G0046230	Sobic.001G137100		Sspon.01G0046230-1B		Sspon.01G0046230-2D	Nucleus
SsHB28	Sspon.01G0051700	Sobic.001G476300			Sspon.01G0051700-1C		Nucleus
SsHB29	Sspon.01G0054630	Sobic.001G476300			Sspon.01G0054630-1C		Nucleus
SsHB30	Sspon.01G0058310	Sobic.002G421800				Sspon.01G0058310-1D	Nucleus
SsHB31	Sspon.01G0062370	Sobic.001G049800				Sspon.01G0062370-1D|Sspon.01G0062370-1P	Nucleus
SsHB32	Sspon.02G0004420	Sobic.002G353800	Sspon.02G0004420-1A	Sspon.02G0004420-2B		Sspon.02G0004420-3D|Sspon.02G0004420-1P	Nucleus
SsHB33	Sspon.02G0009520	Sobic.002G272900	Sspon.02G0009520-1A		Sspon.02G0009520-2C	Sspon.02G0009520-3D	Nucleus
SsHB34	Sspon.02G0009710	Sobic.002G270900	Sspon.02G0009710-1A	Sspon.02G0009710-2B|Sspon.02G0009710-1P		Sspon.02G0009710-4D	Nucleus
SsHB35	Sspon.02G0012580	Sobic.002G231100	Sspon.02G0012580-1A|Sspon.02G0012580-1P	Sspon.02G0012580-2B	Sspon.02G0012580-3C	Sspon.02G0012580-4D	Nucleus
SsHB36	Sspon.02G0012640	Sobic.002G233800	Sspon.02G0012640-1A|Sspon.02G0012640-1P|Sspon.02G0012640-2P	Sspon.02G0012640-2B			Nucleus
SsHB37	Sspon.02G0013660	Sobic.002G220300	Sspon.02G0013660-1A|Sspon.02G0013660-1P		Sspon.02G0013660-2C|Sspon.02G0013660-2P	Sspon.02G0013660-3D	Nucleus
SsHB38	Sspon.02G0014690	Sobic.002G201400	Sspon.02G0014690-1A|Sspon.02G0014690-1P	Sspon.02G0014690-2B|Sspon.02G0014690-2P	Sspon.02G0014690-3C|Sspon.02G0014690-3P	Sspon.02G0014690-4D	Nucleus
SsHB39	Sspon.02G0015460	Sobic.002G189000	Sspon.02G0015460-1A	Sspon.02G0015460-2B	Sspon.02G0015460-3C|Sspon.02G0015460-1T	Sspon.02G0015460-4D	Nucleus
SsHB40	Sspon.02G0016800	Sobic.002G165800	Sspon.02G0016800-1A	Sspon.02G0016800-2B		Sspon.02G0016800-3D	Nucleus
SsHB41	Sspon.02G0020150	Sobic.002G115900	Sspon.02G0020150-1A	Sspon.02G0020150-2B|Sspon.02G0020150-1T	Sspon.02G0020150-3C	Sspon.02G0020150-4D	Nucleus
SsHB42	Sspon.02G0031250	Sobic.008G168100	Sspon.02G0031250-1A|Sspon.02G0031250-1P			Sspon.02G0031250-3D	Nucleus
SsHB43	Sspon.02G0032420	Sobic.008G188900	Sspon.02G0032420-1A		Sspon.02G0032420-3C	Sspon.02G0032420-4D	Nucleus
SsHB44	Sspon.02G0033170	Sobic.002G165800		Sspon.02G0033170-1B			Nucleus
SsHB45	Sspon.02G0040140	Sobic.002G115900		Sspon.02G0040140-1B			Nucleus
SsHB46	Sspon.02G0040170	Sobic.002G115900		Sspon.02G0040170-1B			Nucleus
SsHB47	Sspon.02G0045120	Sobic.008G168100		Sspon.02G0045120-1B		Sspon.02G0045120-2D	Nucleus
SsHB48	Sspon.02G0045140	Sobic.008G168100		Sspon.02G0045140-1B			Nucleus
SsHB49	Sspon.02G0057550	Sobic.002G115900				Sspon.02G0057550-1D	Nucleus
SsHB50	Sspon.03G0002400	Sobic.003G360200	Sspon.03G0002400-1A	Sspon.03G0002400-2B	Sspon.03G0002400-3C	Sspon.03G0002400-4D	Nucleus
SsHB51	Sspon.03G0002740	Sobic.003G356200	Sspon.03G0002740-1A		Sspon.03G0002740-2C	Sspon.03G0002740-3D	Nucleus
SsHB52	Sspon.03G0003900	Sobic.003G336600	Sspon.03G0003900-1A		Sspon.03G0003900-2C|Sspon.03G0003900-1P		Nucleus
SsHB53	Sspon.03G0006030	Sobic.003G303500	Sspon.03G0006030-1A	Sspon.03G0006030-2B	Sspon.03G0006030-3C	Sspon.03G0006030-4D	Nucleus
SsHB54	Sspon.03G0009280	Sobic.003G252100	Sspon.03G0009280-1A	Sspon.03G0009280-2B	Sspon.03G0009280-3C	Sspon.03G0009280-4D	Nucleus
SsHB55	Sspon.03G0009420	Sobic.003G250100	Sspon.03G0009420-1A			Sspon.03G0009420-2D	Nucleus
SsHB56	Sspon.03G0036850	Sobic.003G028300				Sspon.03G0036850-3D	Nucleus
SsHB57	Sspon.03G0039890	Sobic.003G350900			Sspon.03G0039890-1C	Sspon.03G0039890-2D	Nucleus
SsHB58	Sspon.03G0041550	Sobic.003G235900			Sspon.03G0041550-1C		Nucleus
SsHB59	Sspon.03G0043250	Sobic.003G096300			Sspon.03G0043250-1C	Sspon.03G0043250-2D|Sspon.03G0043250-1P	Nucleus
SsHB60	Sspon.04G0002490	Sobic.004G313900	Sspon.04G0002490-1A		Sspon.04G0002490-2C|Sspon.04G0002490-1T	Sspon.04G0002490-3D	Nucleus
SsHB61	Sspon.04G0004340	Sobic.004G251300	Sspon.04G0004340-1A	Sspon.04G0004340-2B	Sspon.04G0004340-3C	Sspon.04G0004340-4D	Nucleus
SsHB62	Sspon.04G0007240	Sobic.004G300300	Sspon.04G0007240-1A|Sspon.04G0007240-1P	Sspon.04G0007240-2B|Sspon.04G0007240-2P	Sspon.04G0007240-3C|Sspon.04G0007240-3P	Sspon.04G0007240-4D	Nucleus
SsHB63	Sspon.04G0010140	Sobic.004G185200	Sspon.04G0010140-1A				Nucleus
SsHB64	Sspon.04G0018340	Sobic.004G041600	Sspon.04G0018340-1A	Sspon.04G0018340-2B|Sspon.04G0018340-1T	Sspon.04G0018340-3C|Sspon.04G0018340-2T	Sspon.04G0018340-4D	Nucleus
SsHB65	Sspon.04G0025170	Sobic.004G185200		Sspon.04G0025170-1B	Sspon.04G0025170-2C|Sspon.04G0025170-1T		Nucleus
SsHB66	Sspon.04G0027350	Sobic.004G097700		Sspon.04G0027350-1B	Sspon.04G0027350-2C	Sspon.04G0027350-3D	Nucleus
SsHB67	Sspon.04G0028990	Sobic.004G041600		Sspon.04G0028990-1B			Nucleus
SsHB68	Sspon.04G0034160	Sobic.004G040000			Sspon.04G0034160-1C	Sspon.04G0034160-2D	Nucleus
SsHB69	Sspon.04G0036740	Sobic.004G300300				Sspon.04G0036740-1D	Nucleus
SsHB70	Sspon.05G0001890	Sobic.006G254900	Sspon.05G0001890-1A	Sspon.05G0001890-2B		Sspon.05G0001890-3D	Nucleus
SsHB71	Sspon.05G0002350	Sobic.006G241000	Sspon.05G0002350-1A	Sspon.05G0002350-2B	Sspon.05G0002350-3C	Sspon.05G0002350-4D	Nucleus
SsHB72	Sspon.05G0003250	Sobic.006G223300	Sspon.05G0003250-1A				Nucleus
SsHB73	Sspon.05G0005870	Sobic.006G169200	Sspon.05G0005870-1A	Sspon.05G0005870-2B	Sspon.05G0005870-3C	Sspon.05G0005870-4D	Nucleus
SsHB74	Sspon.05G0016920	Sobic.005G086700	Sspon.05G0016920-1A	Sspon.05G0016920-2B	Sspon.05G0016920-3C	Sspon.05G0016920-4D	Nucleus
SsHB75	Sspon.05G0018950	Sobic.005G045200	Sspon.05G0018950-1A		Sspon.05G0018950-2C	Sspon.05G0018950-3D	Nucleus
SsHB76	Sspon.05G0023840	Sobic.006G183200		Sspon.05G0023840-1B		Sspon.05G0023840-2D	Nucleus
SsHB77	Sspon.05G0025730	Sobic.003G135101		Sspon.05G0025730-1B			Nucleus
SsHB78	Sspon.05G0028700	Sobic.005G082300		Sspon.05G0028700-1B	Sspon.05G0028700-2C		Nucleus
SsHB79	Sspon.05G0029830	Sobic.005G042200		Sspon.05G0029830-1B		Sspon.05G0029830-2D	Nucleus
SsHB80	Sspon.05G0030790	Sobic.007G065300			Sspon.05G0030790-1C	Sspon.05G0030790-2D	Nucleus
SsHB81	Sspon.06G0004730	Sobic.007G160400	Sspon.06G0004730-1A	Sspon.06G0004730-2B|Sspon.06G0004730-1T	Sspon.06G0004730-3C		Chloroplast
SsHB82	Sspon.06G0008420	Sobic.007G087600	Sspon.06G0008420-1A	Sspon.06G0008420-2B		Sspon.06G0008420-3D	Nucleus
SsHB83	Sspon.06G0011860	Sobic.007G032100	Sspon.06G0011860-1A	Sspon.06G0011860-2B	Sspon.06G0011860-3C	Sspon.06G0011860-4D	Nucleus
SsHB84	Sspon.06G0017830	Sobic.005G200800		Sspon.06G0017830-2B			Nucleus
SsHB85	Sspon.06G0021910	Sobic.007G126400		Sspon.06G0021910-1B		Sspon.06G0021910-2D	Nucleus
SsHB86	Sspon.06G0026570	Sobic.005G200800		Sspon.06G0026570-1B	Sspon.06G0026570-2C		Nucleus
SsHB87	Sspon.07G0001390	Sobic.009G244200	Sspon.07G0001390-1A			Sspon.07G0001390-2D	Nucleus
SsHB88	Sspon.07G0004110	Sobic.009G200500	Sspon.07G0004110-1A			Sspon.07G0004110-2D	Nucleus
SsHB89	Sspon.07G0006620	Sobic.009G159900	Sspon.07G0006620-1A		Sspon.07G0006620-2C|Sspon.07G0006620-1T		Nucleus
SsHB90	Sspon.07G0014230	Sobic.009G030200	Sspon.07G0014230-1A|Sspon.07G0014230-1P	Sspon.07G0014230-2B|Sspon.07G0014230-2P		Sspon.07G0014230-3D	Nucleus
SsHB91	Sspon.07G0020510	Sobic.008G073200	Sspon.07G0020510-1A	Sspon.07G0020510-2B		Sspon.07G0020510-3D	Nucleus
SsHB92	Sspon.07G0022560	Sobic.009G200500			Sspon.07G0022560-2P		Nucleus
SsHB93	Sspon.07G0030100	Sobic.009G244200			Sspon.07G0030100-1C	Sspon.07G0030100-2D	Nucleus
SsHB94	Sspon.07G0032010	Sobic.007G226600			Sspon.07G0032010-1C		Nucleus
SsHB95	Sspon.08G0002490	Sobic.010G247500	Sspon.08G0002490-1A		Sspon.08G0002490-2C	Sspon.08G0002490-3D	Nucleus
SsHB96	Sspon.08G0002500	Sobic.010G247500	Sspon.08G0002500-1A	Sspon.08G0002500-2B	Sspon.08G0002500-3C		Nucleus
SsHB97	Sspon.08G0004940	Sobic.010G207500	Sspon.08G0004940-1A	Sspon.08G0004940-2B|Sspon.08G0004940-1P	Sspon.08G0004940-3C|Sspon.08G0004940-2P	Sspon.08G0004940-4D	Nucleus
SsHB98	Sspon.08G0007230	Sobic.010G169200	Sspon.08G0007230-1A	Sspon.08G0007230-2B|Sspon.08G0007230-1T	Sspon.08G0007230-3C	Sspon.08G0007230-4D	Nucleus
SsHB99	Sspon.08G0015810	Sobic.010G030200	Sspon.08G0015810-1A	Sspon.08G0015810-2B		Sspon.08G0015810-3D	Nucleus
SsHB100	Sspon.08G0015820	Sobic.010G030100	Sspon.08G0015820-1A	Sspon.08G0015820-2B			Nucleus
SsHB101	Sspon.08G0019390	Sobic.010G207500		Sspon.08G0019390-1B	Sspon.08G0019390-2C	Sspon.08G0019390-3D	Nucleus
SsHB102	Sspon.08G0020150	Sobic.010G183400			Sspon.08G0020150-2C	Sspon.08G0020150-1P	Nucleus
SsHB103	Sspon.08G0024350	Sobic.010G006300		Sspon.08G0024350-1B|Sspon.08G0024350-1P			Nucleus
SsHB104	Sspon.08G0028440	NA				Sspon.08G0028440-1D	Nucleus
