# Supplementary material for: Expression Profiling and MicroRNA Regulatory Networks of Homeobox Family Genes in Sugarcane Saccharum spontaneum L
Source: Int J Mol Sci. 2022 Aug 5;23(15):8724. doi: 10.3390/ijms23158724 (PMC9369071; doi:10.3390/ijms23158724)
Supplement: Supplementary file 1 [file ijms-23-08724-s001.zip › Supplementary file 2.xlsx]

## Sheet: S. spontaneum
Supplementary Table S2 The physical and chemical information of S. spontaneum and S. bicolor HB genes
Proposed name	Transcript ID	Class	Gene location	NA(aa)	MV(Da)	pI	Origin
SsHB6	Sspon.01G0004050-1A	HD-ZIPⅠ	Chr1A:11228997..11230942 reverse	383	41055.5	8.49	WGD/Segmental
SsHB7-1	Sspon.01G0004840-1A	HD-ZIPⅠ	Chr1A:13153172..13154475 forward	318	34824	4.67	WGD/Segmental
SsHB7-2	Sspon.01G0004840-2C	HD-ZIPⅠ	Chr1C:12092622..12094144 reverse	321	35181.4	4.64	WGD/Segmental
SsHB7-3	Sspon.01G0004840-3D	HD-ZIPⅠ	Chr1D:11519134..11521135 forward	321	35252.4	4.75	WGD/Segmental
SsHB8-1	Sspon.01G0005450-1A	HD-ZIPⅠ	Chr1A:14582176..14583234 reverse	240	26466.4	6.38	WGD/Segmental
SsHB8-2	Sspon.01G0005450-2B	HD-ZIPⅠ	Chr1B:12869463..12871126 reverse	241	26466.4	6.38	WGD/Segmental
SsHB8-3	Sspon.01G0005450-3D	HD-ZIPⅠ	Chr1D:12760349..12761407 forward	240	26466.4	6.38	WGD/Segmental
SsHB13-1	Sspon.01G0017610-1A	HD-ZIPⅠ	Chr1A:65114237..65116595 forward	366	39010.1	6.63	WGD/Segmental
SsHB13-2	Sspon.01G0017610-1P	HD-ZIPⅠ	Chr1D:9510769..9512797 reverse	314	34151.9	6.86	WGD/Segmental
SsHB13-3	Sspon.01G0017610-2B	HD-ZIPⅠ	Chr1B:69325464..69327459 reverse	358	38082.1	6.47	WGD/Segmental
SsHB13-4	Sspon.01G0017610-3C	HD-ZIPⅠ	Chr1C:66823311..66825013 forward	362	38633.6	6.68	WGD/Segmental
SsHB13-5	Sspon.01G0017610-4D	HD-ZIPⅠ	Chr1D:61580578..61582575 reverse	368	39279.4	6.66	WGD/Segmental
SsHB28	Sspon.01G0051700-1C	HD-ZIPⅠ	Chr1C:17689065..17690537 forward	295	32387	4.65	Dispersed
SsHB29	Sspon.01G0054630-1C	HD-ZIPⅠ	Chr1C:63810974..63811906 reverse	276	29661.8	4.56	WGD/Segmental
SsHB32-1	Sspon.02G0004420-1A	HD-ZIPⅠ	Chr2A:13874439..13875267 reverse	220	24361.1	6.63	WGD/Segmental
SsHB32-2	Sspon.02G0004420-1P	HD-ZIPⅠ	Chr2D:8454751..8455770 forward	229	25367.1	6.4	WGD/Segmental
SsHB32-3	Sspon.02G0004420-2B	HD-ZIPⅠ	Chr2B:13417480..13418194 forward	182	20202.4	5.33	WGD/Segmental
SsHB32-4	Sspon.02G0004420-3D	HD-ZIPⅠ	Chr2D:7712129..7713148 forward	237	26265.3	7.1	WGD/Segmental
SsHB33-1	Sspon.02G0009520-1A	HD-ZIPⅠ	Chr2A:26769388..26770742 forward	244	26513.3	5.23	WGD/Segmental
SsHB33-2	Sspon.02G0009520-2C	HD-ZIPⅠ	Chr2C:29755211..29756120 forward	244	26499.2	5.23	WGD/Segmental
SsHB33-3	Sspon.02G0009520-3D	HD-ZIPⅠ	Chr2D:21377463..21379133 forward	244	26529.3	5.23	WGD/Segmental
SsHB36-1	Sspon.02G0012640-1A	HD-ZIPⅠ	Chr2A:33560718..33562073 forward	270	28995.9	4.5	WGD/Segmental
SsHB36-2	Sspon.02G0012640-1P	HD-ZIPⅠ	Chr2A:33637489..33639061 reverse	270	28995.9	4.5	Proximal
SsHB36-3	Sspon.02G0012640-2B	HD-ZIPⅠ	Chr2B:31626659..31628819 reverse	271	29052.9	4.5	WGD/Segmental
SsHB36-4	Sspon.02G0012640-2P	HD-ZIPⅠ	Chr6A:1878815..1879697 reverse	279	30640.8	4.77	WGD/Segmental
SsHB39-1	Sspon.02G0015460-1A	HD-ZIPⅠ	Chr2A:42207891..42209518 forward	297	32752.8	4.55	WGD/Segmental
SsHB39-2	Sspon.02G0015460-1T	HD-ZIPⅠ	Chr2C:46200034..46202190 reverse	314	34321.6	4.63	Tandem
SsHB39-3	Sspon.02G0015460-2B	HD-ZIPⅠ	Chr2B:40632010..40634656 reverse	313	34104.4	4.69	WGD/Segmental
SsHB39-4	Sspon.02G0015460-3C	HD-ZIPⅠ	Chr2C:46186261..46192018 reverse	507	55575.8	6.95	WGD/Segmental
SsHB39-5	Sspon.02G0015460-4D	HD-ZIPⅠ	Chr2D:36473028..36475412 forward	314	34206.5	4.68	WGD/Segmental
SsHB61-1	Sspon.04G0004340-1A	HD-ZIPⅠ	Chr4A:13005292..13007200 reverse	338	36645.8	4.52	WGD/Segmental
SsHB61-2	Sspon.04G0004340-2B	HD-ZIPⅠ	Chr4B:8350958..8352376 forward	338	36597.8	4.52	WGD/Segmental
SsHB61-3	Sspon.04G0004340-3C	HD-ZIPⅠ	Chr4C:13204950..13207184 reverse	338	36567.7	4.52	WGD/Segmental
SsHB61-4	Sspon.04G0004340-4D	HD-ZIPⅠ	Chr4D:13784409..13834772 reverse	1798	196729	8.12	WGD/Segmental
SsHB62-1	Sspon.04G0007240-1A	HD-ZIPⅠ	Chr4A:20721049..20722937 forward	244	27088.4	4.65	WGD/Segmental
SsHB62-2	Sspon.04G0007240-1P	HD-ZIPⅠ	Chr5A:19642960..19643875 forward	265	29254.5	5.08	WGD/Segmental
SsHB62-3	Sspon.04G0007240-2B	HD-ZIPⅠ	Chr4B:23095193..23096757 reverse	244	27079.4	4.87	Dispersed
SsHB62-4	Sspon.04G0007240-2P	HD-ZIPⅠ	Chr5B:13434716..13435703 reverse	279	31076.8	5.1	WGD/Segmental
SsHB62-5	Sspon.04G0007240-3C	HD-ZIPⅠ	Chr4C:20317426..20318962 reverse	241	27007.5	5.08	WGD/Segmental
SsHB62-6	Sspon.04G0007240-3P	HD-ZIPⅠ	Chr5C:11233704..11235121 reverse	261	28816	5.08	WGD/Segmental
SsHB62-7	Sspon.04G0007240-4D	HD-ZIPⅠ	Chr5D:20920046..20921537 reverse	261	28737.9	4.97	WGD/Segmental
SsHB69	Sspon.04G0036740-1D	HD-ZIPⅠ	Chr4D:47002204..47003925 reverse	230	25821.2	5.69	WGD/Segmental
SsHB85-1	Sspon.06G0021910-1B	HD-ZIPⅠ	Chr6B:21020262..21024356 forward	270	29470	4.5	WGD/Segmental
SsHB85-2	Sspon.06G0021910-2D	HD-ZIPⅠ	Chr6D:21983765..21987333 forward	279	30198.9	4.54	WGD/Segmental
SsHB94	Sspon.07G0032010-1C	HD-ZIPⅠ	Chr7C:42321423..42321767 forward	217	24806	6.9	WGD/Segmental
SsHB10	Sspon.01G0014330-1A	HD-ZIPⅡ	Chr1A:40396791..40407512 forward	601	64600.5	7.69	WGD/Segmental
SsHB12-1	Sspon.01G0015670-1A	HD-ZIPⅡ	Chr1A:45575827..45577008 forward	255	27971.5	8.31	WGD/Segmental
SsHB12-2	Sspon.01G0015670-2B	HD-ZIPⅡ	Chr1B:51722497..51723972 reverse	203	22374.1	9.19	WGD/Segmental
SsHB12-3	Sspon.01G0015670-3C	HD-ZIPⅡ	Chr1C:46554600..46556551 reverse	255	28023.6	8.93	WGD/Segmental
SsHB12-4	Sspon.01G0015670-4D	HD-ZIPⅡ	Chr1D:47576576..47577936 forward	255	27926.5	8.51	WGD/Segmental
SsHB23-1	Sspon.01G0036440-1B	HD-ZIPⅡ	Chr1B:18433427..18435951 reverse	281	30038.4	7.82	WGD/Segmental
SsHB23-2	Sspon.01G0036440-1P	HD-ZIPⅡ	Chr1B:18778983..18781294 reverse	276	29652.1	8.39	WGD/Segmental
SsHB23-3	Sspon.01G0036440-2C	HD-ZIPⅡ	Chr1C:13865494..13867391 forward	285	30472.9	8.4	WGD/Segmental
SsHB23-4	Sspon.01G0036440-2P	HD-ZIPⅡ	Chr1D:15375330..15377887 forward	268	28868.2	7.86	WGD/Segmental
SsHB23-5	Sspon.01G0036440-3D	HD-ZIPⅡ	Chr8D:48451851..48453287 forward	268	28606	7.86	WGD/Segmental
SsHB37-1	Sspon.02G0013660-1A	HD-ZIPⅡ	Chr2A:36355381..36357172 forward	391	41806.4	8.59	WGD/Segmental
SsHB37-2	Sspon.02G0013660-1P	HD-ZIPⅡ	Chr6A:1277197..1278615 forward	368	37803.8	7.77	WGD/Segmental
SsHB37-3	Sspon.02G0013660-2C	HD-ZIPⅡ	Chr2C:38766521..38767920 reverse	359	38067	7	WGD/Segmental
SsHB37-4	Sspon.02G0013660-2P	HD-ZIPⅡ	Chr6C:15487632..15489045 forward	366	37498.4	8.06	WGD/Segmental
SsHB37-5	Sspon.02G0013660-3D	HD-ZIPⅡ	Chr6D:14724955..14726674 forward	363	37125	8.38	WGD/Segmental
SsHB58	Sspon.03G0041550-1C	HD-ZIPⅡ	Chr3C:43165190..43169707 reverse	212	23045.8	10.27	Dispersed
SsHB63	Sspon.04G0010140-1A	HD-ZIPⅡ	Chr4A:30296927..30304802 forward	258	27778.5	4.47	WGD/Segmental
SsHB64-1	Sspon.04G0018340-1A	HD-ZIPⅡ	Chr4A:66100151..66100997 reverse	253	27043	10.19	WGD/Segmental
SsHB64-2	Sspon.04G0018340-1T	HD-ZIPⅡ	Chr4B:69507215..69508058 reverse	252	26807.7	10.27	Tandem
SsHB64-3	Sspon.04G0018340-2B	HD-ZIPⅡ	Chr4B:69495560..69496418 reverse	257	27463.4	10.27	WGD/Segmental
SsHB64-4	Sspon.04G0018340-2T	HD-ZIPⅡ	Chr4C:71566610..71567453 forward	252	26677.6	10.42	Tandem
SsHB64-5	Sspon.04G0018340-3C	HD-ZIPⅡ	Chr4C:71538418..71539261 forward	252	26778.7	10.24	WGD/Segmental
SsHB64-6	Sspon.04G0018340-4D	HD-ZIPⅡ	Chr4D:75248049..75248899 reverse	255	26864.8	10.11	WGD/Segmental
SsHB65-1	Sspon.04G0025170-1B	HD-ZIPⅡ	Chr4B:25355725..25365638 forward	475	51917.8	8.76	WGD/Segmental
SsHB65-2	Sspon.04G0025170-1T	HD-ZIPⅡ	Chr4C:28843179..28845333 forward	315	34405.3	6.25	Tandem
SsHB65-3	Sspon.04G0025170-2C	HD-ZIPⅡ	Chr4C:28832704..28834827 forward	322	35061	6.6	Tandem
SsHB67	Sspon.04G0028990-1B	HD-ZIPⅡ	Chr4B:69553883..69554720 reverse	252	26767.7	9.89	Tandem
SsHB73-1	Sspon.05G0005870-1A	HD-ZIPⅡ	Chr5A:18639515..18640821 forward	242	26926.5	8.7	WGD/Segmental
SsHB73-2	Sspon.05G0005870-2B	HD-ZIPⅡ	Chr5B:12853335..12854831 forward	228	25288.6	8.65	WGD/Segmental
SsHB73-3	Sspon.05G0005870-3C	HD-ZIPⅡ	Chr5C:10556900..10558311 forward	231	25560.9	8.92	WGD/Segmental
SsHB73-4	Sspon.05G0005870-4D	HD-ZIPⅡ	Chr5D:20353868..20355178 forward	223	24925.2	8.92	WGD/Segmental
SsHB95-1	Sspon.08G0002490-1A	HD-ZIPⅡ	Chr8A:7339759..7340765 forward	243	25903.9	9.24	WGD/Segmental
SsHB95-2	Sspon.08G0002490-2C	HD-ZIPⅡ	Chr8C:5470305..5473417 forward	357	38658.3	9.46	WGD/Segmental
SsHB95-3	Sspon.08G0002490-3D	HD-ZIPⅡ	Chr8D:5545318..5546325 forward	230	24465.2	8.12	WGD/Segmental
SsHB96-1	Sspon.08G0002500-1A	HD-ZIPⅡ	Chr8A:7341813..7345328 forward	310	35652.7	11.13	WGD/Segmental
SsHB96-2	Sspon.08G0002500-2B	HD-ZIPⅡ	Chr8B:3924537..3931029 forward	487	54289.3	9.43	WGD/Segmental
SsHB96-3	Sspon.08G0002500-3C	HD-ZIPⅡ	Chr8C:5474639..5478714 forward	277	31871.2	9.93	WGD/Segmental
SsHB99-1	Sspon.08G0015810-1A	HD-ZIPⅡ	Chr8A:63124987..63125984 reverse	301	31492.8	9.36	WGD/Segmental
SsHB99-2	Sspon.08G0015810-2B	HD-ZIPⅡ	Chr8B:57680913..57682026 reverse	339	35814.7	9.36	WGD/Segmental
SsHB99-3	Sspon.08G0015810-3D	HD-ZIPⅡ	Chr8D:59453314..59454002 forward	198	20450.4	7.93	WGD/Segmental
SsHB100-1	Sspon.08G0015820-1A	HD-ZIPⅡ	Chr8A:63143584..63144494 reverse	276	28484.8	9.71	Tandem
SsHB100-2	Sspon.08G0015820-2B	HD-ZIPⅡ	Chr8B:57715500..57716410 reverse	276	28440.8	9.71	Tandem
SsHB1-1	Sspon.01G0000520-1A	HD-ZIPⅢ	Chr1A:2006826..2019647 reverse	827	90291.1	6.62	WGD/Segmental
SsHB1-2	Sspon.01G0000520-1P	HD-ZIPⅢ	Chr1C:1123867..1131098 forward	666	72852.7	5.71	WGD/Segmental
SsHB1-3	Sspon.01G0000520-2B	HD-ZIPⅢ	Chr1B:1030106..1037245 forward	382	41770.6	5.99	WGD/Segmental
SsHB1-4	Sspon.01G0000520-3C	HD-ZIPⅢ	Chr1C:1205958..1213093 reverse	666	72852.7	5.71	WGD/Segmental
SsHB14-1	Sspon.01G0019630-1P	HD-ZIPⅢ	Chr1A:73326637..73335250 forward	830	90939	5.69	WGD/Segmental
SsHB14-2	Sspon.01G0019630-2B	HD-ZIPⅢ	Chr1B:79115476..79122838 forward	824	90227.2	6.06	WGD/Segmental
SsHB14-3	Sspon.01G0019630-3C	HD-ZIPⅢ	Chr1C:75061800..75068737 forward	705	77976.1	6.73	WGD/Segmental
SsHB14-4	Sspon.01G0019630-4D	HD-ZIPⅢ	Chr1D:71254140..71261726 reverse	691	75959	5.71	WGD/Segmental
SsHB15-1	Sspon.01G0024110-1A	HD-ZIPⅢ	Chr1A:86735177..86741312 reverse	552	60141.8	6.45	WGD/Segmental
SsHB15-2	Sspon.01G0024110-2B	HD-ZIPⅢ	Chr1B:92402393..92405889 forward	321	35807.3	9.19	WGD/Segmental
SsHB15-3	Sspon.01G0024110-3C	HD-ZIPⅢ	Chr1C:85158911..85164632 reverse	703	77038.9	7.02	WGD/Segmental
SsHB15-4	Sspon.01G0024110-4D	HD-ZIPⅢ	Chr1D:84136400..84142123 forward	855	93004.9	6.58	WGD/Segmental
SsHB42-1	Sspon.02G0031250-1A	HD-ZIPⅢ	Chr2A:114419368..114425651 forward	890	97020.8	6.92	WGD/Segmental
SsHB42-2	Sspon.02G0031250-1P	HD-ZIPⅢ	Chr2A:114370025..114376321 reverse	891	97020.8	6.92	Proximal
SsHB42-3	Sspon.02G0031250-3D	HD-ZIPⅢ	Chr2D:91451160..91457846 forward	678	73754.3	7.02	WGD/Segmental
SsHB47-1	Sspon.02G0045120-1B	HD-ZIPⅢ	Chr2B:108032102..108038372 forward	881	95715.5	6.95	WGD/Segmental
SsHB47-2	Sspon.02G0045120-2D	HD-ZIPⅢ	Chr2D:91482380..91489075 forward	855	92905.2	6.81	Proximal
SsHB48	Sspon.02G0045140-1B	HD-ZIPⅢ	Chr2B:108141890..108148410 reverse	721	78465.6	7.22	Proximal
SsHB56-1	Sspon.03G0036850-1B	HD-ZIPⅢ	Chr3B:94666812..94670479 reverse	546	58600.7	5.43	WGD/Segmental
SsHB56-2	Sspon.03G0036850-3D	HD-ZIPⅢ	Chr3D:56274418..56278736 reverse	884	95960.1	6.54	WGD/Segmental
SsHB4	Sspon.01G0003330-1A	HD-ZIPⅣ	Chr1A:9119456..9124568 reverse	863	93440.5	6.5	Dispersed
SsHB11-1	Sspon.01G0015190-1A	HD-ZIPⅣ	Chr1A:43985698..43991045 reverse	983	105650	6.38	WGD/Segmental
SsHB11-2	Sspon.01G0015190-2B	HD-ZIPⅣ	Chr1B:49538785..49543879 forward	732	78972.8	6.26	WGD/Segmental
SsHB11-3	Sspon.01G0015190-3C	HD-ZIPⅣ	Chr1C:45022879..45028666 forward	878	94237.7	5.55	WGD/Segmental
SsHB11-4	Sspon.01G0015190-4D	HD-ZIPⅣ	Chr1D:45085830..45086374 forward	144	15202.8	4.71	WGD/Segmental
SsHB34-1	Sspon.02G0009710-1A	HD-ZIPⅣ	Chr2A:27080303..27085903 reverse	782	82469.5	6.43	WGD/Segmental
SsHB34-2	Sspon.02G0009710-1P	HD-ZIPⅣ	Chr2B:26247601..26254274 forward	597	63495.2	6.1	WGD/Segmental
SsHB34-3	Sspon.02G0009710-2B	HD-ZIPⅣ	Chr2B:26199180..26205603 reverse	597	63495.2	6.1	WGD/Segmental
SsHB34-4	Sspon.02G0009710-4D	HD-ZIPⅣ	Chr2D:21719920..21726778 forward	871	91865	6.39	WGD/Segmental
SsHB41-1	Sspon.02G0020150-1A	HD-ZIPⅣ	Chr2A:65795616..65799959 forward	726	78887	6.75	WGD/Segmental
SsHB41-2	Sspon.02G0020150-1T	HD-ZIPⅣ	Chr2B:65654601..65656861 forward	513	56700	7.07	Tandem
SsHB41-3	Sspon.02G0020150-2B	HD-ZIPⅣ	Chr2B:65709950..65715772 reverse	729	79321.6	6.88	WGD/Segmental
SsHB41-4	Sspon.02G0020150-3C	HD-ZIPⅣ	Chr2C:67393174..67394543 reverse	785	85698.1	7.53	WGD/Segmental
SsHB41-5	Sspon.02G0020150-4D	HD-ZIPⅣ	Chr2D:60857392..60860204 forward	664	72570	6.64	WGD/Segmental
SsHB45	Sspon.02G0040140-1B	HD-ZIPⅣ	Chr2B:65748039..65749684 reverse	702	75925.8	6.82	Proximal
SsHB46	Sspon.02G0040170-1B	HD-ZIPⅣ	Chr2B:65801624..65802681 reverse	1031	112386	7.62	Proximal
SsHB49	Sspon.02G0057550-1D	HD-ZIPⅣ	Chr2D:60927561..60930428 forward	709	76901.8	7.38	Proximal
SsHB53-1	Sspon.03G0006030-1A	HD-ZIPⅣ	Chr3A:16774968..16777481 reverse	629	69084.2	8.63	WGD/Segmental
SsHB53-2	Sspon.03G0006030-2B	HD-ZIPⅣ	Chr3B:24037884..24044731 forward	739	80478.7	8.66	WGD/Segmental
SsHB53-3	Sspon.03G0006030-3C	HD-ZIPⅣ	Chr3C:32032458..32034979 forward	629	69299.7	9.12	WGD/Segmental
SsHB53-4	Sspon.03G0006030-4D	HD-ZIPⅣ	Chr3D:21137937..21140682 forward	649	71594	8.49	WGD/Segmental
SsHB59-1	Sspon.03G0043250-1C	HD-ZIPⅣ	Chr3C:78652402..78658156 forward	799	85490.8	5.22	WGD/Segmental
SsHB59-2	Sspon.03G0043250-1P	HD-ZIPⅣ	Chr3D:44465813..44472659 forward	421	45010.2	6.06	Proximal
SsHB59-3	Sspon.03G0043250-2D	HD-ZIPⅣ	Chr3D:44547031..44553923 forward	747	80827	6	WGD/Segmental
SsHB60-1	Sspon.04G0002490-1A	HD-ZIPⅣ	Chr4A:7538631..7540491 reverse	257	26545.9	7.15	WGD/Segmental
SsHB60-2	Sspon.04G0002490-1T	HD-ZIPⅣ	Chr4C:8725889..8728911 forward	546	58014.8	6.02	Tandem
SsHB60-3	Sspon.04G0002490-2C	HD-ZIPⅣ	Chr4C:8714968..8717987 forward	546	58014.8	6.02	WGD/Segmental
SsHB60-4	Sspon.04G0002490-3D	HD-ZIPⅣ	Chr4D:8543099..8547010 reverse	786	85587.1	6.83	WGD/Segmental
SsHB72	Sspon.05G0003250-1A	HD-ZIPⅣ	Chr5A:9715919..9723257 forward	874	94518.9	5.47	WGD/Segmental
SsHB76-1	Sspon.05G0023840-1B	HD-ZIPⅣ	Chr5B:10448622..10453775 forward	577	62301.6	7.24	WGD/Segmental
SsHB76-2	Sspon.05G0023840-2D	HD-ZIPⅣ	Chr5D:18008835..18013895 forward	518	56239.4	6.56	WGD/Segmental
SsHB80-1	Sspon.05G0030790-1C	HD-ZIPⅣ	Chr5C:962383..968136 forward	805	87039.7	5.68	WGD/Segmental
SsHB80-2	Sspon.05G0030790-2D	HD-ZIPⅣ	Chr5D:10009172..10015534 reverse	792	85708.3	5.77	WGD/Segmental
SsHB83-1	Sspon.06G0011860-1A	HD-ZIPⅣ	Chr6A:64411787..64416083 forward	805	86250	6.09	WGD/Segmental
SsHB83-2	Sspon.06G0011860-2B	HD-ZIPⅣ	Chr6B:52339400..52344525 forward	800	85376.9	5.96	WGD/Segmental
SsHB83-3	Sspon.06G0011860-3C	HD-ZIPⅣ	Chr6C:51835545..51839931 reverse	814	87005.7	6.16	WGD/Segmental
SsHB83-4	Sspon.06G0011860-4D	HD-ZIPⅣ	Chr6D:47137445..47142933 reverse	806	85972.6	6.24	WGD/Segmental
SsHB40-1	Sspon.02G0016800-1A	SAWADEE	Chr2A:47112832..47119355 forward	435	48008.5	7.74	WGD/Segmental
SsHB40-2	Sspon.02G0016800-2B	SAWADEE	Chr2B:44851837..44858125 forward	554	60870.6	7.56	WGD/Segmental
SsHB40-3	Sspon.02G0016800-3D	SAWADEE	Chr2D:49247847..49254573 forward	382	42247	7.09	WGD/Segmental
SsHB44	Sspon.02G0033170-1B	SAWADEE	Chr2B:5022397..5028872 forward	400	44309.4	7.13	Dispersed
SsHB78-1	Sspon.05G0028700-1B	SAWADEE	Chr5B:72010102..72014696 forward	199	22883.7	8.81	WGD/Segmental
SsHB78-2	Sspon.05G0028700-2C	SAWADEE	Chr5C:66640261..66644778 forward	209	24073	9.28	WGD/Segmental
SsHB9	Sspon.01G0008800-1A	WOX	Chr1A:24448762..24450784 reverse	286	29119.1	8.47	WGD/Segmental
SsHB30	Sspon.01G0058310-1D	WOX	Chr1D:25306847..25309614 reverse	293	29730.7	8.83	WGD/Segmental
SsHB50-1	Sspon.03G0002400-1A	WOX	Chr3A:6063521..6064285 forward	214	24095.7	8.02	WGD/Segmental
SsHB50-2	Sspon.03G0002400-2B	WOX	Chr3B:15499886..15500821 forward	215	24109.7	8.02	WGD/Segmental
SsHB50-3	Sspon.03G0002400-3C	WOX	Chr3C:21627064..21627948 reverse	215	24109.7	8.02	WGD/Segmental
SsHB50-4	Sspon.03G0002400-4D	WOX	Chr3D:7709352..7710290 reverse	211	23716.5	8.63	Dispersed
SsHB52-1	Sspon.03G0003900-1A	WOX	Chr3A:9957493..9961787 forward	248	27651.1	9.86	WGD/Segmental
SsHB52-2	Sspon.03G0003900-1P	WOX	Chr3C:26495971..26499512 reverse	259	28575.6	6.44	WGD/Segmental
SsHB52-3	Sspon.03G0003900-2C	WOX	Chr3C:27214753..27218292 forward	227	25401.1	6.59	WGD/Segmental
SsHB55-1	Sspon.03G0009420-1A	WOX	Chr3A:25724699..25727896 forward	542	55767.5	8.73	Dispersed
SsHB55-2	Sspon.03G0009420-2D	WOX	Chr7D:4643906..4656584 reverse	869	91838.5	7.27	Dispersed
SsHB57-1	Sspon.03G0039890-1C	WOX	Chr3C:23061041..23063260 forward	329	35119.1	8.94	WGD/Segmental
SsHB57-2	Sspon.03G0039890-2D	WOX	Chr3D:15331686..15334440 forward	298	31667.9	9.52	WGD/Segmental
SsHB70-1	Sspon.05G0001890-1A	WOX	Chr5A:6052859..6054021 forward	316	32659	8.71	WGD/Segmental
SsHB70-2	Sspon.05G0001890-2B	WOX	Chr5B:954588..955733 forward	315	32599	8.71	WGD/Segmental
SsHB70-3	Sspon.05G0001890-3D	WOX	Chr5D:3947934..3950102 forward	248	25532.2	9.96	WGD/Segmental
SsHB71-1	Sspon.05G0002350-1A	WOX	Chr5A:7174794..7175663 forward	229	25302.5	10.27	WGD/Segmental
SsHB71-2	Sspon.05G0002350-2B	WOX	Chr5B:2460643..2461522 forward	229	25322.5	10.27	WGD/Segmental
SsHB71-3	Sspon.05G0002350-3C	WOX	Chr5C:6899124..6899993 forward	229	25302.5	10.27	WGD/Segmental
SsHB71-4	Sspon.05G0002350-4D	WOX	Chr5D:6518129..6518593 forward	127	14164.7	9.54	WGD/Segmental
SsHB79-1	Sspon.05G0029830-1B	WOX	Chr5B:83757657..83758555 reverse	258	27244.1	8.17	WGD/Segmental
SsHB79-2	Sspon.05G0029830-2D	WOX	Chr5D:76934450..76935341 forward	264	27934.8	8.17	WGD/Segmental
SsHB82-1	Sspon.06G0008420-1A	WOX	Chr6A:44438792..44439749 reverse	267	28908.2	7.02	WGD/Segmental
SsHB82-2	Sspon.06G0008420-2B	WOX	Chr6B:35510027..35512779 reverse	281	30194.6	7.01	WGD/Segmental
SsHB82-3	Sspon.06G0008420-3D	WOX	Chr6D:33377338..33378298 reverse	266	28779	7.02	WGD/Segmental
SsHB31-1	Sspon.01G0062370-1D	DDT	Chr1D:103859680..103873155 forward	687	77271.1	7.53	WGD/Segmental
SsHB31-2	Sspon.01G0062370-1P	DDT	Chr1D:104584147..104603807 reverse	1017	114479	6.89	WGD/Segmental
SsHB54-1	Sspon.03G0009280-1A	DDT	Chr3A:25457703..25479207 reverse	1485	165011	5.27	WGD/Segmental
SsHB54-2	Sspon.03G0009280-2B	DDT	Chr3B:32332448..32336027 reverse	215	24106.7	9.31	Dispersed
SsHB54-3	Sspon.03G0009280-3C	DDT	Chr3C:40651986..40658293 reverse	424	45364.7	6.61	WGD/Segmental
SsHB54-4	Sspon.03G0009280-4D	DDT	Chr3D:30238130..30255512 reverse	1809	201643	5.05	WGD/Segmental
SsHB84	Sspon.06G0017830-2B	NDX	Chr6B:79956691..79963779 reverse	813	89814.3	5.24	WGD/Segmental
SsHB86-1	Sspon.06G0026570-1B	NDX	Chr6B:80058478..80065647 reverse	898	99459.8	5.13	WGD/Segmental
SsHB86-2	Sspon.06G0026570-2C	NDX	Chr6C:71931289..71938200 reverse	895	99358.3	5.5	WGD/Segmental
SsHB68-1	Sspon.04G0034160-1C	PHD	Chr4C:71795170..71802941 reverse	653	72952.9	6.35	WGD/Segmental
SsHB68-2	Sspon.04G0034160-2D	PHD	Chr4D:75372526..75380604 reverse	581	65062.9	6.04	WGD/Segmental
SsHB88-1	Sspon.07G0004110-1A	PHD	Chr7A:10066853..10070720 reverse	718	78981.3	4.63	WGD/Segmental
SsHB88-2	Sspon.07G0004110-2D	PHD	Chr7D:9386285..9391581 reverse	694	76149.2	4.76	WGD/Segmental
SsHB92	Sspon.07G0022560-2P	PHD	Chr7C:6277627..6280379 reverse	576	62887.7	4.32	WGD/Segmental
SsHB2-1	Sspon.01G0001380-1A	KNOX	Chr1A:4294766..4302093 forward	334	36575	6.39	WGD/Segmental
SsHB2-2	Sspon.01G0001380-1P	KNOX	Chr1A:4317468..4324088 forward	379	41715.7	6	Proximal
SsHB2-3	Sspon.01G0001380-2D	KNOX	Chr1D:4314154..4320093 forward	385	42247.3	5.93	WGD/Segmental
SsHB2-4	Sspon.01G0001380-2P	KNOX	Chr1A:4284113..4290679 forward	208	20285.7	12.6	Singleton
SsHB16-1	Sspon.01G0025190-1A	KNOX	Chr1A:89063619..89064957 forward	208	22981.5	9.49	WGD/Segmental
SsHB16-2	Sspon.01G0025190-2C	KNOX	Chr1C:87592802..87593391 forward	183	20082.3	9.93	WGD/Segmental
SsHB17-1	Sspon.01G0025280-1A	KNOX	Chr1A:89386774..89395282 forward	751	80228.5	6.22	WGD/Segmental
SsHB17-2	Sspon.01G0025280-1T	KNOX	Chr1A:89393579..89396179 reverse	728	80739.5	5.98	WGD/Segmental
SsHB20-1	Sspon.01G0027720-1A	KNOX	Chr1A:96918794..96919183 forward	130	13310.8	7.79	Dispersed
SsHB20-2	Sspon.01G0027720-2B	KNOX	Chr1B:57188292..57195237 reverse	351	38911.7	7.09	Proximal
SsHB21-1	Sspon.01G0027730-1A	KNOX	Chr1A:96919424..96926256 forward	225	26023.4	6.69	WGD/Segmental
SsHB21-2	Sspon.01G0027730-2C	KNOX	Chr1C:95080519..95085885 reverse	403	45723.5	6.65	WGD/Segmental
SsHB21-3	Sspon.01G0027730-3D	KNOX	Chr1D:91172605..91178827 forward	342	37555	6.26	WGD/Segmental
SsHB22-1	Sspon.01G0028940-1A	KNOX	Chr1A:100859750..100870900 forward	363	40330	6.51	WGD/Segmental
SsHB22-2	Sspon.01G0028940-1P	KNOX	Chr2A:85069426..85075685 reverse	335	36761.1	7.76	WGD/Segmental
SsHB22-3	Sspon.01G0028940-2B	KNOX	Chr1B:62224221..62225347 forward	161	18443.9	7.5	WGD/Segmental
SsHB22-4	Sspon.01G0028940-2P	KNOX	Chr1B:111029624..111035287 forward	243	26508.6	6.86	WGD/Segmental
SsHB22-5	Sspon.01G0028940-3C	KNOX	Chr2C:89778503..89785623 reverse	351	38424.8	6.69	WGD/Segmental
SsHB22-6	Sspon.01G0028940-3P	KNOX	Chr2B:86508108..86514667 forward	351	38465	6.87	WGD/Segmental
SsHB22-7	Sspon.01G0028940-4D	KNOX	Chr1D:97791631..97798130 reverse	225	24309.1	5.96	WGD/Segmental
SsHB22-8	Sspon.01G0028940-4P	KNOX	Chr2D:80944889..80956512 forward	351	38434.9	6.69	WGD/Segmental
SsHB25	Sspon.01G0041880-1B	KNOX	Chr1B:57216081..57222713 reverse	190	21866.8	8.45	Proximal
SsHB90-1	Sspon.07G0014230-1A	KNOX	Chr7A:51352113..51359292 forward	303	32902.8	5.29	WGD/Segmental
SsHB90-2	Sspon.07G0014230-1P	KNOX	Chr3A:49213286..49220825 forward	295	32328.1	5.45	WGD/Segmental
SsHB90-3	Sspon.07G0014230-2B	KNOX	Chr7B:56730087..56737098 forward	280	30706.5	5.99	WGD/Segmental
SsHB90-4	Sspon.07G0014230-2P	KNOX	Chr3B:73420859..73428064 reverse	295	32349.1	5.46	WGD/Segmental
SsHB90-5	Sspon.07G0014230-3D	KNOX	Chr7D:50817090..50823911 forward	280	30618.3	5.71	WGD/Segmental
SsHB97-1	Sspon.08G0004940-1A	KNOX	Chr8A:14396878..14400069 forward	313	34147.2	6.65	WGD/Segmental
SsHB97-2	Sspon.08G0004940-1P	KNOX	Chr4B:65015985..65019316 reverse	326	35307.4	6.51	Proximal
SsHB97-3	Sspon.08G0004940-2B	KNOX	Chr4B:65002366..65005199 reverse	333	36401.7	6.68	WGD/Segmental
SsHB97-4	Sspon.08G0004940-2P	KNOX	Chr4C:67421159..67424741 reverse	324	35165.3	6.51	WGD/Segmental
SsHB97-5	Sspon.08G0004940-3C	KNOX	Chr4C:80032216..80035643 reverse	310	33202.1	5.21	WGD/Segmental
SsHB97-6	Sspon.08G0004940-4D	KNOX	Chr4D:70245004..70248467 reverse	302	32722.5	6.25	WGD/Segmental
SsHB101-1	Sspon.08G0019390-1B	KNOX	Chr8B:11907804..11911478 reverse	318	34491.3	6.13	WGD/Segmental
SsHB101-2	Sspon.08G0019390-2C	KNOX	Chr3C:95005482..95009078 reverse	318	34509.4	6.13	Dispersed
SsHB101-3	Sspon.08G0019390-3D	KNOX	Chr8D:12107689..12111169 reverse	228	24005.8	4.57	WGD/Segmental
SsHB104	Sspon.08G0028440-1D	KNOX	Chr8D:12128383..12131872 reverse	273	29483.8	6.86	Tandem
SsHB3-1	Sspon.01G0001400-1A	BEL	Chr1A:4362634..4366886 forward	646	68293.2	6.7	WGD/Segmental
SsHB3-2	Sspon.01G0001400-1P	BEL	Chr1A:37110844..37116498 reverse	618	64910	7.03	WGD/Segmental
SsHB3-3	Sspon.01G0001400-2B	BEL	Chr1B:3061139..3066834 reverse	636	67362.1	6.67	WGD/Segmental
SsHB3-4	Sspon.01G0001400-2P	BEL	Chr1C:37818869..37825563 reverse	617	65308.4	7.31	WGD/Segmental
SsHB3-5	Sspon.01G0001400-3C	BEL	Chr1C:3921993..3927961 forward	638	67646.5	6.67	WGD/Segmental
SsHB3-6	Sspon.01G0001400-3P	BEL	Chr1D:4234880..4240630 forward	636	67332.1	6.69	WGD/Segmental
SsHB3-7	Sspon.01G0001400-4D	BEL	Chr1D:65454554..65458359 forward	435	47130.4	11.64	WGD/Segmental
SsHB3-8	Sspon.01G0001400-4P	BEL	Chr1D:39596178..39601603 reverse	618	64941.9	6.97	WGD/Segmental
SsHB5-1	Sspon.01G0003770-1A	BEL	Chr1A:10640208..10642345 reverse	584	61719.6	6.28	WGD/Segmental
SsHB5-2	Sspon.01G0003770-1P	BEL	Chr1D:8863660..8865794 reverse	586	62455.5	6.26	WGD/Segmental
SsHB5-3	Sspon.01G0003770-2B	BEL	Chr1B:8819016..8822820 reverse	588	62565.6	6.2	WGD/Segmental
SsHB5-4	Sspon.01G0003770-3C	BEL	Chr1C:9710612..9712731 reverse	580	62123.2	6.2	WGD/Segmental
SsHB5-5	Sspon.01G0003770-4D	BEL	Chr1D:8694984..8698771 reverse	552	58835.6	6.23	WGD/Segmental
SsHB18-1	Sspon.01G0026170-1A	BEL	Chr1A:91095505..91104523 reverse	729	76712.8	8.21	WGD/Segmental
SsHB18-2	Sspon.01G0026170-2B	BEL	Chr1B:99518247..99527570 reverse	732	77250.2	8.38	WGD/Segmental
SsHB18-3	Sspon.01G0026170-3D	BEL	Chr1D:92166368..92176674 forward	765	79327.1	6.82	WGD/Segmental
SsHB24	Sspon.01G0037910-1B	BEL	Chr1B:26854316..26860140 forward	402	42620.2	7.63	WGD/Segmental
SsHB26-1	Sspon.01G0046220-1B	BEL	Chr1B:96661265..96662657 reverse	354	38387.1	6.07	WGD/Segmental
SsHB26-2	Sspon.01G0046220-2C	BEL	Chr1C:86882942..86884067 forward	307	33166.8	8.12	WGD/Segmental
SsHB27-1	Sspon.01G0046230-1B	BEL	Chr1B:96670638..96673810 forward	647	71419.5	5.68	Tandem
SsHB27-2	Sspon.01G0046230-2D	BEL	Chr1D:87191345..87196935 reverse	648	71550.7	5.58	WGD/Segmental
SsHB43-1	Sspon.02G0032420-1A	BEL	Chr2A:120343207..120345796 reverse	652	72770.6	5.86	WGD/Segmental
SsHB43-2	Sspon.02G0032420-3C	BEL	Chr2C:99762075..99764965 forward	655	72876.7	5.86	WGD/Segmental
SsHB43-3	Sspon.02G0032420-4D	BEL	Chr2D:86807950..86813109 forward	657	72985.9	5.74	WGD/Segmental
SsHB51-1	Sspon.03G0002740-1A	BEL	Chr3A:6558600..6562823 forward	595	63874.2	7.63	WGD/Segmental
SsHB51-2	Sspon.03G0002740-2C	BEL	Chr3C:22366286..22371456 forward	591	63420.7	7.76	WGD/Segmental
SsHB51-3	Sspon.03G0002740-3D	BEL	Chr3D:14709106..14714380 forward	592	63652	7.76	WGD/Segmental
SsHB66-1	Sspon.04G0027350-1B	BEL	Chr4B:58492333..58494352 reverse	541	57060.1	7.18	WGD/Segmental
SsHB66-2	Sspon.04G0027350-2C	BEL	Chr4C:60789294..60791215 reverse	561	58634	6.97	WGD/Segmental
SsHB66-3	Sspon.04G0027350-3D	BEL	Chr4D:62587590..62589469 reverse	547	57282.5	7.26	WGD/Segmental
SsHB75-1	Sspon.05G0018950-1A	BEL	Chr5A:80866648..80868841 forward	461	49361.8	10.27	WGD/Segmental
SsHB75-2	Sspon.05G0018950-2C	BEL	Chr5C:78915298..78920775 forward	670	69837.9	6.78	WGD/Segmental
SsHB75-3	Sspon.05G0018950-3D	BEL	Chr5D:76085907..76089307 forward	520	54460.9	6.47	WGD/Segmental
SsHB89-1	Sspon.07G0006620-1A	BEL	Chr7A:17045449..17049156 reverse	568	60865	8.47	WGD/Segmental
SsHB89-2	Sspon.07G0006620-1T	BEL	Chr7C:12403649..12406806 reverse	383	41820	8.29	Tandem
SsHB89-3	Sspon.07G0006620-2C	BEL	Chr7C:12365417..12369786 forward	568	60865	8.47	WGD/Segmental
SsHB98-1	Sspon.08G0007230-1A	BEL	Chr8A:22898592..22900438 reverse	504	52949.8	6.64	WGD/Segmental
SsHB98-2	Sspon.08G0007230-1T	BEL	Chr8B:20902251..20904097 forward	504	52892.6	6.64	Tandem
SsHB98-3	Sspon.08G0007230-2B	BEL	Chr8B:20889641..20891116 forward	380	40665.4	8.57	WGD/Segmental
SsHB98-4	Sspon.08G0007230-3C	BEL	Chr8C:23465526..23467372 reverse	504	52916.7	6.64	WGD/Segmental
SsHB98-5	Sspon.08G0007230-4D	BEL	Chr8D:20402542..20404669 forward	506	53039.9	6.64	WGD/Segmental
SsHB103-1	Sspon.08G0024350-1B	BEL	Chr8B:63443265..63447185 reverse	521	56394.2	7.52	Proximal
SsHB103-2	Sspon.08G0024350-1P	BEL	Chr8B:63352327..63356325 forward	521	56363.2	7.52	WGD/Segmental
SsHB102-1	Sspon.08G0020150-1P	PINTOX	Chr8D:17430637..17432270 forward	329	36494.8	4.6	WGD/Segmental
SsHB102-2	Sspon.08G0020150-2C	PINTOX	Chr8C:19931479..19933129 forward	329	36465.7	4.64	WGD/Segmental
SsHB19-1	Sspon.01G0027040-1A	PLINC	Chr1A:95565269..95565973 forward	234	24310	8.42	WGD/Segmental
SsHB19-2	Sspon.01G0027040-1P	PLINC	Chr1A:95428087..95428611 reverse	175	18859	8.9	WGD/Segmental
SsHB19-3	Sspon.01G0027040-2D	PLINC	Chr1D:90251717..90254581 forward	261	27273.5	9.29	WGD/Segmental
SsHB35-1	Sspon.02G0012580-1A	PLINC	Chr2A:33295470..33296343 forward	264	28605	8.33	WGD/Segmental
SsHB35-2	Sspon.02G0012580-1P	PLINC	Chr2A:34343020..34343892 reverse	291	30330.9	8.14	WGD/Segmental
SsHB35-3	Sspon.02G0012580-2B	PLINC	Chr2B:31859363..31861066 forward	266	27642.9	8.51	WGD/Segmental
SsHB35-4	Sspon.02G0012580-3C	PLINC	Chr2C:37279632..37280507 forward	292	30534.1	8.14	WGD/Segmental
SsHB35-5	Sspon.02G0012580-4D	PLINC	Chr2D:28000030..28000911 forward	294	30807.3	7.96	WGD/Segmental
SsHB38-1	Sspon.02G0014690-1A	PLINC	Chr2A:39233857..39234945 reverse	363	37327.4	7.94	WGD/Segmental
SsHB38-2	Sspon.02G0014690-1P	PLINC	Chr6A:19418050..19419174 forward	375	38930.3	6.95	WGD/Segmental
SsHB38-3	Sspon.02G0014690-2B	PLINC	Chr2B:37346764..37347870 forward	369	38137.3	8.18	WGD/Segmental
SsHB38-4	Sspon.02G0014690-2P	PLINC	Chr6B:17309952..17311082 reverse	377	38973.3	6.95	WGD/Segmental
SsHB38-5	Sspon.02G0014690-3C	PLINC	Chr2C:42077687..42078784 forward	366	38069.3	7.69	WGD/Segmental
SsHB38-6	Sspon.02G0014690-3P	PLINC	Chr6C:18098028..18099179 forward	384	39664	6.72	WGD/Segmental
SsHB38-7	Sspon.02G0014690-4D	PLINC	Chr2D:33055753..33056862 forward	370	38358.7	8.11	WGD/Segmental
SsHB74-1	Sspon.05G0016920-1A	PLINC	Chr5A:70238419..70239702 reverse	428	44399.3	8.15	WGD/Segmental
SsHB74-2	Sspon.05G0016920-2B	PLINC	Chr5B:70172034..70172531 forward	166	17305.7	8.68	Singleton
SsHB74-3	Sspon.05G0016920-3C	PLINC	Chr5C:65510371..65511672 reverse	434	45058.1	7.97	WGD/Segmental
SsHB74-4	Sspon.05G0016920-4D	PLINC	Chr5D:66125315..66126604 reverse	430	44772.8	8.15	WGD/Segmental
SsHB77	Sspon.05G0025730-1B	PLINC	Chr5B:26518907..26519821 reverse	305	31731.5	7.87	Dispersed
SsHB81-1	Sspon.06G0004730-1A	PLINC	Chr6A:15173895..15174833 forward	313	32097.7	7.17	WGD/Segmental
SsHB81-2	Sspon.06G0004730-1T	PLINC	Chr6B:12150789..12151079 forward	97	10570.2	10.95	Dispersed
SsHB81-3	Sspon.06G0004730-2B	PLINC	Chr6B:12150154..12150782 forward	186	20068.2	8.39	WGD/Segmental
SsHB81-4	Sspon.06G0004730-3C	PLINC	Chr6C:13267149..13268078 reverse	310	31882.5	7.15	WGD/Segmental
SsHB87-1	Sspon.07G0001390-1A	PLINC	Chr7A:3216549..3220991 forward	289	31610.5	9.89	WGD/Segmental
SsHB87-2	Sspon.07G0001390-2D	PLINC	Chr7D:2628276..2632718 reverse	284	30549.2	10.38	WGD/Segmental
SsHB91-1	Sspon.07G0020510-1A	PLINC	Chr7A:76441223..76442206 reverse	328	34497.7	9.44	WGD/Segmental
SsHB91-2	Sspon.07G0020510-2B	PLINC	Chr7B:79829613..79832254 forward	320	34199.4	9.44	WGD/Segmental
SsHB91-3	Sspon.07G0020510-3D	PLINC	Chr7D:67449866..67451720 reverse	432	45834.8	8.38	WGD/Segmental
SsHB93-1	Sspon.07G0030100-1C	PLINC	Chr7C:2098888..2100723 reverse	468	50382.6	10.31	WGD/Segmental
SsHB93-2	Sspon.07G0030100-2D	PLINC	Chr7D:2647098..2647607 forward	170	17912.9	9.07	Tandem

## Sheet: S. bicolor
Supplementary Table S2 Characteristics of S. spontaneum and S. bicolor HB genes
Proposed name	Transcript ID	Subfamily	Gene location	NA(aa)	MV(Da)	pI	Origin
SbHB12	Sobic.001G253900.1	HD-ZIPⅠ	Chr01:28076570..28079329reverse	363	38678.7	6.62	WGD/Segmental
SbHB18	Sobic.001G468400.1	HD-ZIPⅠ	Chr01:74135478..74137316forward	243	26596.6	6.38	Dispersed
SbHB19	Sobic.001G476300.1	HD-ZIPⅠ	Chr01:74847924..74850474forward	325	35365.5	4.56	WGD/Segmental
SbHB20	Sobic.001G488900.1	HD-ZIPⅠ	Chr01:75920535..75923262forward	356	38887.1	6.77	WGD/Segmental
SbHB28	Sobic.002G189000.1	HD-ZIPⅠ	Chr02:57498941..57501442reverse	318	34608.7	4.38	WGD/Segmental
SbHB32	Sobic.002G233800.1	HD-ZIPⅠ	Chr02:62486832..62489116forward	274	29313.2	4.5	WGD/Segmental
SbHB34	Sobic.002G272900.1	HD-ZIPⅠ	Chr02:65616732..65618588reverse	244	26553.2	5.23	Dispersed
SbHB35	Sobic.002G353800.1	HD-ZIPⅠ	Chr02:71707176..71708719forward	232	25585.4	6.52	Dispersed
SbHB57	Sobic.004G251300.1	HD-ZIPⅠ	Chr04:59757180..59759005reverse	342	37064.2	4.38	WGD/Segmental
SbHB59	Sobic.004G300300.1	HD-ZIPⅠ	Chr04:63901938..63906312forward	251	27787.4	4.79	WGD/Segmental
SbHB68	Sobic.006G163900.1	HD-ZIPⅠ	Chr06:52167161..52168720forward	271	30249.4	5.1	WGD/Segmental
SbHB77	Sobic.007G126400.1	HD-ZIPⅠ	Chr07:53917095..53921739reverse	276	30209	4.59	WGD/Segmental
SbHB81	Sobic.007G226600.3	HD-ZIPⅠ	Chr07:65372300..65378782reverse	185	20230.3	5.02	WGD/Segmental
SbHB13	Sobic.001G278800.1	HD-ZIPⅡ	Chr01:54391971..54393894forward	255	27769.2	8.23	WGD/Segmental
SbHB15	Sobic.001G297200.1	HD-ZIPⅡ	Chr01:57719789..57721751reverse	347	37678.8	8.83	WGD/Segmental
SbHB17	Sobic.001G447400.1	HD-ZIPⅡ	Chr01:72474590..72477017forward	300	31691.2	8.16	WGD/Segmental
SbHB30	Sobic.002G220300.1	HD-ZIPⅡ	Chr02:61161894..61164206reverse	370	39124.3	7.4	WGD/Segmental
SbHB41	Sobic.003G235900.1	HD-ZIPⅡ	Chr03:57452999..57457769reverse	231	25256.1	9.47	Dispersed
SbHB53	Sobic.004G041600.1	HD-ZIPⅡ	Chr04:3418030..3419487forward	260	27265	9.67	WGD/Segmental
SbHB56	Sobic.004G185200.1	HD-ZIPⅡ	Chr04:53801359..53803654reverse	324	35196.2	6.32	Dispersed
SbHB69	Sobic.006G169200.1	HD-ZIPⅡ	Chr06:52620124..52622122reverse	234	25756.2	8.92	WGD/Segmental
SbHB79	Sobic.007G152300.1	HD-ZIPⅡ	Chr07:58474408..58476809reverse	383	39140.2	8.08	WGD/Segmental
SbHB92	Sobic.010G030100.1	HD-ZIPⅡ	Chr10:2443617..2445280forward	286	29326.5	9.71	Tandem
SbHB93	Sobic.010G030200.1	HD-ZIPⅡ	Chr10:2464191..2466076forward	319	33412.1	9.84	Tandem
SbHB98	Sobic.010G247500.1	HD-ZIPⅡ	Chr10:58751560..58753232reverse	237	25488.4	9.75	WGD/Segmental
SbHB10	Sobic.001G157400.1	HD-ZIPⅢ	Chr01:12747203..12752962forward	855	93045	6.58	Dispersed
SbHB11	Sobic.001G217200.1	HD-ZIPⅢ	Chr01:20162363..20171185reverse	839	91984.1	5.92	Tandem
SbHB24	Sobic.001G537300.1	HD-ZIPⅢ	Chr01:80022635..80029457reverse	841	92114.4	6.15	Tandem
SbHB37	Sobic.003G028300.1	HD-ZIPⅢ	Chr03:2499007..2504480forward	845	91847.3	6.14	Dispersed
SbHB83	Sobic.008G168100.1	HD-ZIPⅢ	Chr08:60200470..60207218reverse	858	93132.3	6.84	Dispersed
SbHB14	Sobic.001G286700.1	HD-ZIPⅣ	Chr01:56194409..56200997forward	883	94805.2	5.47	Tandem
SbHB26	Sobic.002G115900.1	HD-ZIPⅣ	Chr02:14263932..14268689reverse	731	79849.9	7.58	Tandem
SbHB33	Sobic.002G270900.1	HD-ZIPⅣ	Chr02:65448185..65454356reverse	873	92209.5	6.37	WGD/Segmental
SbHB38	Sobic.003G096300.1	HD-ZIPⅣ	Chr03:8517359..8523922reverse	816	86893.4	5.15	Tandem
SbHB46	Sobic.003G303500.1	HD-ZIPⅣ	Chr03:63388447..63397543reverse	712	78416.5	7.66	Tandem
SbHB47	Sobic.003G321500.1	HD-ZIPⅣ	Chr03:64895680..64900967forward	761	82533.6	5.54	Dispersed
SbHB60	Sobic.004G313900.1	HD-ZIPⅣ	Chr04:65043028..65048460forward	708	77069.2	6.59	WGD/Segmental
SbHB66	Sobic.006G020700.1	HD-ZIPⅣ	Chr06:3564784..3572233forward	739	80749	6.23	Tandem
SbHB67	Sobic.006G034900.1	HD-ZIPⅣ	Chr06:10293238..10297960forward	767	84355.7	5.18	Tandem
SbHB70	Sobic.006G183200.1	HD-ZIPⅣ	Chr06:53818644..53824454reverse	803	86139.5	5.68	Tandem
SbHB71	Sobic.006G223300.1	HD-ZIPⅣ	Chr06:56941457..56947804reverse	790	85256.6	5.53	Dispersed
SbHB74	Sobic.007G032100.1	HD-ZIPⅣ	Chr07:2841278..2846378reverse	815	86796.5	6.01	Dispersed
SbHB75	Sobic.007G065300.1	HD-ZIPⅣ	Chr07:6922405..6928221forward	782	84367.7	5.93	Dispersed
SbHB94	Sobic.010G078700.1	HD-ZIPⅣ	Chr10:6604879..6609516reverse	701	76537.9	6.28	WGD/Segmental
SbHB27	Sobic.002G165800.1	SAWADEE	Chr02:51703391..51710156reverse	382	42244	6.9	Tandem
SbHB63	Sobic.005G082300.1	SAWADEE	Chr05:10902591..10910703reverse	291	33235.4	8.62	Dispersed
SbHB36	Sobic.002G421800.1	WOX	Chr02:76925180..76928257forward	258	27140.2	8.45	WGD/Segmental
SbHB42	Sobic.003G250100.1	WOX	Chr03:58842868..58847887reverse	531	54206.9	8.23	WGD/Segmental
SbHB48	Sobic.003G336600.1	WOX	Chr03:65980444..65986209forward	279	30818.1	6.45	Dispersed
SbHB49	Sobic.003G350900.1	WOX	Chr03:67043349..67046708reverse	341	36256.2	8.92	Dispersed
SbHB51	Sobic.003G360200.1	WOX	Chr03:67781768..67783049reverse	219	24524.1	8.03	Dispersed
SbHB61	Sobic.005G042200.1	WOX	Chr05:3893885..3895397forward	261	27584.5	8.17	Dispersed
SbHB72	Sobic.006G241000.1	WOX	Chr06:58182835..58184194reverse	246	26992.4	9.37	Dispersed
SbHB73	Sobic.006G254900.1	WOX	Chr06:59228203..59230361reverse	328	33453	8.79	Dispersed
SbHB76	Sobic.007G087600.1	WOX	Chr07:11950504..11952139forward	277	29540	8.13	Dispersed
SbHB85	Sobic.009G023900.1	WOX	Chr09:2106676..2108858reverse	273	28848.4	8.15	Dispersed
SbHB89	Sobic.009G233000.1	WOX	Chr09:57264786..57269445forward	497	52008.1	6.85	WGD/Segmental
SbHB1	Sobic.001G049800.1	DDT	Chr01:3651840..3663735forward	1148	129113	7.29	Tandem
SbHB43	Sobic.003G252100.1	DDT	Chr03:59014845..59033236forward	1843	205290	5.26	Tandem
SbHB44	Sobic.003G252200.2	DDT	Chr03:59054607..59078060forward	1824	203407	5.29	Tandem
SbHB65	Sobic.005G200800.1	NDX	Chr05:68630225..68638291reverse	1025	113176	7.33	Tandem
SbHB45	Sobic.003G294600.1	PHD	Chr03:62693144..62702017reverse	1583	173116	6.35	WGD/Segmental
SbHB52	Sobic.004G040000.1	PHD	Chr04:3282669..3290335forward	731	81697.8	6.65	Dispersed
SbHB88	Sobic.009G200500.1	PHD	Chr09:55030821..55038173forward	752	82441	4.5	WGD/Segmental
SbHB2	Sobic.001G075101.1	KNOX	Chr01:5717165..5727509reverse	350	38713.2	6.35	WGD/Segmental
SbHB4	Sobic.001G106000.2	KNOX	Chr01:8143601..8150285forward	372	40469.2	6.75	WGD/Segmental
SbHB5	Sobic.001G106200.1	KNOX	Chr01:8180004..8187693forward	361	39863.7	7.07	Proximal
SbHB9	Sobic.001G140200.1	KNOX	Chr01:11185282..11192665forward	335	36797.5	5.49	WGD/Segmental
SbHB23	Sobic.001G526200.1	KNOX	Chr01:79021004..79026139reverse	324	35154.3	6.05	Dispersed
SbHB25	Sobic.002G023900.1	KNOX	Chr02:2228532..2234882forward	357	38884.3	6.69	WGD/Segmental
SbHB40	Sobic.003G144200.1	KNOX	Chr03:14636092..14643061forward	295	32458.2	5.68	WGD/Segmental
SbHB54	Sobic.004G067100.2	KNOX	Chr04:5474973..5478493forward	307	33122	6.25	WGD/Segmental
SbHB86	Sobic.009G030200.1	KNOX	Chr09:2690764..2697614reverse	304	32960.7	5.14	WGD/Segmental
SbHB97	Sobic.010G207500.1	KNOX	Chr10:55038648..55041924reverse	320	34605.4	6.13	WGD/Segmental
SbHB3	Sobic.001G102300.1	BEL	Chr01:7815194..7826656reverse	771	80773.9	7.05	Dispersed
SbHB7	Sobic.001G137100.1	BEL	Chr01:10870887..10877123forward	650	71785.8	5.68	WGD/Segmental
SbHB8	Sobic.001G137200.1	BEL	Chr01:10881461..10883068forward	357	38948.9	6.25	Tandem
SbHB16	Sobic.001G314900.1	BEL	Chr01:60313504..60320531forward	635	66723.7	6.83	WGD/Segmental
SbHB21	Sobic.001G494000.1	BEL	Chr01:76310773..76314880forward	591	62831	6.3	Dispersed
SbHB22	Sobic.001G525900.1	BEL	Chr01:78988198..78994119reverse	627	66680.4	6.63	WGD/Segmental
SbHB50	Sobic.003G356200.1	BEL	Chr03:67444380..67449359reverse	594	63830.1	7.51	WGD/Segmental
SbHB55	Sobic.004G097700.1	BEL	Chr04:8672667..8675878forward	565	58844.3	6.94	WGD/Segmental
SbHB62	Sobic.005G045200.1	BEL	Chr05:4274728..4280346reverse	691	71660.8	6.63	WGD/Segmental
SbHB84	Sobic.008G188900.1	BEL	Chr08:62311403..62316497reverse	659	73131.1	5.74	WGD/Segmental
SbHB87	Sobic.009G159900.1	BEL	Chr09:51761909..51766758forward	571	61218.4	8.2	WGD/Segmental
SbHB91	Sobic.010G006300.1	BEL	Chr10:515296..521202forward	525	57039.9	7.4	Dispersed
SbHB95	Sobic.010G169200.1	BEL	Chr10:49920953..49925273reverse	495	52607.5	7.1	WGD/Segmental
SbHB96	Sobic.010G183400.1	PINTOX	Chr10:52306094..52308047forward	334	36885.2	4.69	Singleton
SbHB6	Sobic.001G112500.1	PLINC	Chr01:8818579..8819909reverse	235	24354.1	8.03	Dispersed
SbHB29	Sobic.002G201400.1	PLINC	Chr02:59137193..59139344reverse	382	39386.8	7.92	Proximal
SbHB31	Sobic.002G231100.1	PLINC	Chr02:62260977..62263538forward	303	31467	7.78	WGD/Segmental
SbHB39	Sobic.003G135101.1	PLINC	Chr03:12775263..12776376forward	266	29293.4	12.2	Dispersed
SbHB58	Sobic.004G266800.1	PLINC	Chr04:61121294..61123365forward	407	43482.1	7.05	Dispersed
SbHB64	Sobic.005G086700.1	PLINC	Chr05:12140462..12143102forward	395	40831.7	7.92	Tandem
SbHB78	Sobic.007G139200.1	PLINC	Chr07:56772162..56773696reverse	391	40284.8	7.01	Proximal
SbHB80	Sobic.007G160400.1	PLINC	Chr07:59510515..59514391reverse	312	31798.4	7.3	WGD/Segmental
SbHB82	Sobic.008G073200.1	PLINC	Chr08:10156190..10159500reverse	329	34724.7	9.14	WGD/Segmental
SbHB90	Sobic.009G244200.2	PLINC	Chr09:58020542..58023140forward	374	39706	8.61	Dispersed
