# Supplementary material for: Expression Profiling and MicroRNA Regulatory Networks of Homeobox Family Genes in Sugarcane Saccharum spontaneum L
Source: Int J Mol Sci. 2022 Aug 5;23(15):8724. doi: 10.3390/ijms23158724 (PMC9369071; doi:10.3390/ijms23158724)
Supplement: Supplementary file 1 [file ijms-23-08724-s001.zip › Supplementary file 3.xlsx]

## Sheet: Sheet1
Supplementary Table S3 Collinear gene pairs in the SsHB gene family
Gene1					Gene2
Name	Gene ID	Chr	Start	End	Name	gene ID	Chr	Start	End
SsHB1-1	Sspon.01G0000520-1A	Chr1A	2006826	2019647	SsHB1-2	Sspon.01G0000520-1P	Chr1C	1123867	1131098
SsHB1-1	Sspon.01G0000520-1A	Chr1A	2006826	2019647	SsHB1-4	Sspon.01G0000520-3C	Chr1C	1205958	1213093
SsHB1-3	Sspon.01G0000520-2B	Chr1B	1030106	1037245	SsHB1-2	Sspon.01G0000520-1P	Chr1C	1123867	1131098
SsHB1-3	Sspon.01G0000520-2B	Chr1B	1030106	1037245	SsHB1-4	Sspon.01G0000520-3C	Chr1C	1205958	1213093
SsHB1-4	Sspon.01G0000520-3C	Chr1C	1205958	1213093	SsHB56-3	Sspon.03G0036850-3D	Chr3D	56274418	56278736
SsHB2-1	Sspon.01G0001380-1A	Chr1A	4294766	4302093	SsHB90-5	Sspon.07G0014230-3D	Chr7D	50817090	50823911
SsHB3-1	Sspon.01G0001400-1A	Chr1A	4362634	4366886	SsHB3-6	Sspon.01G0001400-3C	Chr1C	3921993	3927961
SsHB3-1	Sspon.01G0001400-1A	Chr1A	4362634	4366886	SsHB3-5	Sspon.01G0001400-2P	Chr1C	37818869	37825563
SsHB3-1	Sspon.01G0001400-1A	Chr1A	4362634	4366886	SsHB3-7	Sspon.01G0001400-3P	Chr1D	4234880	4240630
SsHB3-1	Sspon.01G0001400-1A	Chr1A	4362634	4366886	SsHB3-9	Sspon.01G0001400-4P	Chr1D	39596178	39601603
SsHB3-1	Sspon.01G0001400-1A	Chr1A	4362634	4366886	SsHB98-4	Sspon.08G0007230-3C	Chr8C	23465526	23467372
SsHB3-2	Sspon.01G0001400-1P	Chr1A	37110844	37116498	SsHB3-5	Sspon.01G0001400-2P	Chr1C	37818869	37825563
SsHB3-2	Sspon.01G0001400-1P	Chr1A	37110844	37116498	SsHB3-6	Sspon.01G0001400-3C	Chr1C	3921993	3927961
SsHB3-2	Sspon.01G0001400-1P	Chr1A	37110844	37116498	SsHB3-9	Sspon.01G0001400-4P	Chr1D	39596178	39601603
SsHB3-2	Sspon.01G0001400-1P	Chr1A	37110844	37116498	SsHB3-7	Sspon.01G0001400-3P	Chr1D	4234880	4240630
SsHB3-4	Sspon.01G0001400-2B	Chr1B	3061139	3066834	SsHB3-6	Sspon.01G0001400-3C	Chr1C	3921993	3927961
SsHB3-4	Sspon.01G0001400-2B	Chr1B	3061139	3066834	SsHB3-5	Sspon.01G0001400-2P	Chr1C	37818869	37825563
SsHB3-4	Sspon.01G0001400-2B	Chr1B	3061139	3066834	SsHB3-7	Sspon.01G0001400-3P	Chr1D	4234880	4240630
SsHB3-4	Sspon.01G0001400-2B	Chr1B	3061139	3066834	SsHB3-9	Sspon.01G0001400-4P	Chr1D	39596178	39601603
SsHB3-6	Sspon.01G0001400-3C	Chr1C	3921993	3927961	SsHB3-5	Sspon.01G0001400-2P	Chr1C	37818869	37825563
SsHB3-6	Sspon.01G0001400-3C	Chr1C	3921993	3927961	SsHB3-7	Sspon.01G0001400-3P	Chr1D	4234880	4240630
SsHB3-6	Sspon.01G0001400-3C	Chr1C	3921993	3927961	SsHB3-9	Sspon.01G0001400-4P	Chr1D	39596178	39601603
SsHB3-6	Sspon.01G0001400-3C	Chr1C	3921993	3927961	SsHB66-3	Sspon.04G0027350-3D	Chr4D	62587590	62589469
SsHB3-9	Sspon.01G0001400-4P	Chr1D	39596178	39601603	SsHB90-3	Sspon.07G0014230-2B	Chr7B	56730087	56737098
SsHB3-9	Sspon.01G0001400-4P	Chr1D	39596178	39601603	SsHB98-5	Sspon.08G0007230-4D	Chr8D	20402542	20404669
SsHB5-1	Sspon.01G0003770-1A	Chr1A	10640208	10642345	SsHB5-4	Sspon.01G0003770-3C	Chr1C	9710612	9712731
SsHB5-1	Sspon.01G0003770-1A	Chr1A	10640208	10642345	SsHB5-2	Sspon.01G0003770-1P	Chr1D	8863660	8865794
SsHB5-1	Sspon.01G0003770-1A	Chr1A	10640208	10642345	SsHB5-5	Sspon.01G0003770-4D	Chr1D	8694984	8698771
SsHB5-3	Sspon.01G0003770-2B	Chr1B	8819016	8822820	SsHB5-4	Sspon.01G0003770-3C	Chr1C	9710612	9712731
SsHB5-3	Sspon.01G0003770-2B	Chr1B	8819016	8822820	SsHB5-2	Sspon.01G0003770-1P	Chr1D	8863660	8865794
SsHB5-3	Sspon.01G0003770-2B	Chr1B	8819016	8822820	SsHB5-5	Sspon.01G0003770-4D	Chr1D	8694984	8698771
SsHB5-4	Sspon.01G0003770-3C	Chr1C	9710612	9712731	SsHB5-2	Sspon.01G0003770-1P	Chr1D	8863660	8865794
SsHB5-4	Sspon.01G0003770-3C	Chr1C	9710612	9712731	SsHB5-5	Sspon.01G0003770-4D	Chr1D	8694984	8698771
SsHB5-4	Sspon.01G0003770-3C	Chr1C	9710612	9712731	SsHB103-2	Sspon.08G0024350-1P	Chr8B	63352327	63356325
SsHB6	Sspon.01G0004050-1A	Chr1A	11228997	11230942	SsHB13-1	Sspon.01G0017610-1A	Chr1A	65114237	65116595
SsHB6	Sspon.01G0004050-1A	Chr1A	11228997	11230942	SsHB13-4	Sspon.01G0017610-3C	Chr1C	66823311	66825013
SsHB6	Sspon.01G0004050-1A	Chr1A	11228997	11230942	SsHB13-2	Sspon.01G0017610-1P	Chr1D	9510769	9512797
SsHB6	Sspon.01G0004050-1A	Chr1A	11228997	11230942	SsHB13-5	Sspon.01G0017610-4D	Chr1D	61580578	61582575
SsHB7-1	Sspon.01G0004840-1A	Chr1A	13153172	13154475	SsHB13-1	Sspon.01G0017610-1A	Chr1A	65114237	65116595
SsHB7-1	Sspon.01G0004840-1A	Chr1A	13153172	13154475	SsHB7-3	Sspon.01G0004840-3D	Chr1D	11519134	11521135
SsHB7-2	Sspon.01G0004840-2C	Chr1C	12092622	12094144	SsHB7-3	Sspon.01G0004840-3D	Chr1D	11519134	11521135
SsHB7-2	Sspon.01G0004840-2C	Chr1C	12092622	12094144	SsHB8-3	Sspon.01G0005450-3D	Chr1D	12760349	12761407
SsHB7-2	Sspon.01G0004840-2C	Chr1C	12092622	12094144	SsHB13-5	Sspon.01G0017610-4D	Chr1D	61580578	61582575
SsHB8-1	Sspon.01G0005450-1A	Chr1A	14582176	14583234	SsHB8-3	Sspon.01G0005450-3D	Chr1D	12760349	12761407
SsHB9	Sspon.01G0008800-1A	Chr1A	24448762	24450784	SsHB52-2	Sspon.03G0003900-1P	Chr3C	26495971	26499512
SsHB9	Sspon.01G0008800-1A	Chr1A	24448762	24450784	SsHB52-3	Sspon.03G0003900-2C	Chr3C	27214753	27218292
SsHB10	Sspon.01G0014330-1A	Chr1A	40396791	40407512	SsHB73-1	Sspon.05G0005870-1A	Chr5A	18639515	18640821
SsHB10	Sspon.01G0014330-1A	Chr1A	40396791	40407512	SsHB73-2	Sspon.05G0005870-2B	Chr5B	12853335	12854831
SsHB10	Sspon.01G0014330-1A	Chr1A	40396791	40407512	SsHB73-3	Sspon.05G0005870-3C	Chr5C	10556900	10558311
SsHB10	Sspon.01G0014330-1A	Chr1A	40396791	40407512	SsHB73-4	Sspon.05G0005870-4D	Chr5D	20353868	20355178
SsHB11-1	Sspon.01G0015190-1A	Chr1A	43985698	43991045	SsHB11-3	Sspon.01G0015190-3C	Chr1C	45022879	45028666
SsHB11-1	Sspon.01G0015190-1A	Chr1A	43985698	43991045	SsHB83-2	Sspon.06G0011860-2B	Chr6B	52339400	52344525
SsHB11-2	Sspon.01G0015190-2B	Chr1B	49538785	49543879	SsHB11-3	Sspon.01G0015190-3C	Chr1C	45022879	45028666
SsHB11-2	Sspon.01G0015190-2B	Chr1B	49538785	49543879	SsHB80-1	Sspon.05G0030790-1C	Chr5C	962383	968136
SsHB11-2	Sspon.01G0015190-2B	Chr1B	49538785	49543879	SsHB80-2	Sspon.05G0030790-2D	Chr5D	10009172	10015534
SsHB12-1	Sspon.01G0015670-1A	Chr1A	45575827	45577008	SsHB13-1	Sspon.01G0017610-1A	Chr1A	65114237	65116595
SsHB12-1	Sspon.01G0015670-1A	Chr1A	45575827	45577008	SsHB12-3	Sspon.01G0015670-3C	Chr1C	46554600	46556551
SsHB12-1	Sspon.01G0015670-1A	Chr1A	45575827	45577008	SsHB23-3	Sspon.01G0036440-2C	Chr1C	13865494	13867391
SsHB12-1	Sspon.01G0015670-1A	Chr1A	45575827	45577008	SsHB12-4	Sspon.01G0015670-4D	Chr1D	47576576	47577936
SsHB12-1	Sspon.01G0015670-1A	Chr1A	45575827	45577008	SsHB23-4	Sspon.01G0036440-2P	Chr1D	15375330	15377887
SsHB12-1	Sspon.01G0015670-1A	Chr1A	45575827	45577008	SsHB96-2	Sspon.08G0002500-2B	Chr8B	3924537	3931029
SsHB12-1	Sspon.01G0015670-1A	Chr1A	45575827	45577008	SsHB23-5	Sspon.01G0036440-3D	Chr8D	48451851	48453287
SsHB12-1	Sspon.01G0015670-1A	Chr1A	45575827	45577008	SsHB95-3	Sspon.08G0002490-3D	Chr8D	5545318	5546325
SsHB12-2	Sspon.01G0015670-2B	Chr1B	51722497	51723972	SsHB12-4	Sspon.01G0015670-4D	Chr1D	47576576	47577936
SsHB12-2	Sspon.01G0015670-2B	Chr1B	51722497	51723972	SsHB37-4	Sspon.02G0013660-2P	Chr6C	15487632	15489045
SsHB12-2	Sspon.01G0015670-2B	Chr1B	51722497	51723972	SsHB99-2	Sspon.08G0015810-2B	Chr8B	57680913	57682026
SsHB12-3	Sspon.01G0015670-3C	Chr1C	46554600	46556551	SsHB12-4	Sspon.01G0015670-4D	Chr1D	47576576	47577936
SsHB12-3	Sspon.01G0015670-3C	Chr1C	46554600	46556551	SsHB23-4	Sspon.01G0036440-2P	Chr1D	15375330	15377887
SsHB12-4	Sspon.01G0015670-4D	Chr1D	47576576	47577936	SsHB96-2	Sspon.08G0002500-2B	Chr8B	3924537	3931029
SsHB12-4	Sspon.01G0015670-4D	Chr1D	47576576	47577936	SsHB95-2	Sspon.08G0002490-2C	Chr8C	5470305	5473417
SsHB13-1	Sspon.01G0017610-1A	Chr1A	65114237	65116595	SsHB13-4	Sspon.01G0017610-3C	Chr1C	66823311	66825013
SsHB13-1	Sspon.01G0017610-1A	Chr1A	65114237	65116595	SsHB13-5	Sspon.01G0017610-4D	Chr1D	61580578	61582575
SsHB13-1	Sspon.01G0017610-1A	Chr1A	65114237	65116595	SsHB13-2	Sspon.01G0017610-1P	Chr1D	9510769	9512797
SsHB13-3	Sspon.01G0017610-2B	Chr1B	69325464	69327459	SsHB73-1	Sspon.05G0005870-1A	Chr5A	18639515	18640821
SsHB13-3	Sspon.01G0017610-2B	Chr1B	69325464	69327459	SsHB73-2	Sspon.05G0005870-2B	Chr5B	12853335	12854831
SsHB13-5	Sspon.01G0017610-4D	Chr1D	61580578	61582575	SsHB95-3	Sspon.08G0002490-3D	Chr8D	5545318	5546325
SsHB14-2	Sspon.01G0019630-1P	Chr1A	73326637	73335250	SsHB14-4	Sspon.01G0019630-3C	Chr1C	75061800	75068737
SsHB14-2	Sspon.01G0019630-1P	Chr1A	73326637	73335250	SsHB14-5	Sspon.01G0019630-4D	Chr1D	71254140	71261726
SsHB14-3	Sspon.01G0019630-2B	Chr1B	79115476	79122838	SsHB14-4	Sspon.01G0019630-3C	Chr1C	75061800	75068737
SsHB14-3	Sspon.01G0019630-2B	Chr1B	79115476	79122838	SsHB14-5	Sspon.01G0019630-4D	Chr1D	71254140	71261726
SsHB14-4	Sspon.01G0019630-3C	Chr1C	75061800	75068737	SsHB14-5	Sspon.01G0019630-4D	Chr1D	71254140	71261726
SsHB14-4	Sspon.01G0019630-3C	Chr1C	75061800	75068737	SsHB47-1	Sspon.02G0045120-1B	Chr2B	108032102	108038372
SsHB15-1	Sspon.01G0024110-1A	Chr1A	86735177	86741312	SsHB15-5	Sspon.01G0024110-4D	Chr1D	84136400	84142123
SsHB15-1	Sspon.01G0024110-1A	Chr1A	86735177	86741312	SsHB47-1	Sspon.02G0045120-1B	Chr2B	108032102	108038372
SsHB15-4	Sspon.01G0024110-3C	Chr1C	85158911	85164632	SsHB15-5	Sspon.01G0024110-4D	Chr1D	84136400	84142123
SsHB15-4	Sspon.01G0024110-3C	Chr1C	85158911	85164632	SsHB47-1	Sspon.02G0045120-1B	Chr2B	108032102	108038372
SsHB15-5	Sspon.01G0024110-4D	Chr1D	84136400	84142123	SsHB47-1	Sspon.02G0045120-1B	Chr2B	108032102	108038372
SsHB15-5	Sspon.01G0024110-4D	Chr1D	84136400	84142123	SsHB42-4	Sspon.02G0031250-3D	Chr2D	91451160	91457846
SsHB21-1	Sspon.01G0027730-1A	Chr1A	96919424	96926256	SsHB18-2	Sspon.01G0026170-2B	Chr1B	99518247	99527570
SsHB21-3	Sspon.01G0027730-3D	Chr1D	91172605	91178827	SsHB22-5	Sspon.01G0028940-3C	Chr2C	89778503	89785623
SsHB21-3	Sspon.01G0027730-3D	Chr1D	91172605	91178827	SsHB90-1	Sspon.07G0014230-1A	Chr7A	51352113	51359292
SsHB22-1	Sspon.01G0028940-1A	Chr1A	100859750	100870900	SsHB3-6	Sspon.01G0001400-3C	Chr1C	3921993	3927961
SsHB22-1	Sspon.01G0028940-1A	Chr1A	100859750	100870900	SsHB3-9	Sspon.01G0001400-4P	Chr1D	39596178	39601603
SsHB22-1	Sspon.01G0028940-1A	Chr1A	100859750	100870900	SsHB22-6	Sspon.01G0028940-3P	Chr2B	86508108	86514667
SsHB22-1	Sspon.01G0028940-1A	Chr1A	100859750	100870900	SsHB43-3	Sspon.02G0032420-3C	Chr2C	99762075	99764965
SsHB22-1	Sspon.01G0028940-1A	Chr1A	100859750	100870900	SsHB22-5	Sspon.01G0028940-3C	Chr2C	89778503	89785623
SsHB22-1	Sspon.01G0028940-1A	Chr1A	100859750	100870900	SsHB22-8	Sspon.01G0028940-4P	Chr2D	80944889	80956512
SsHB22-1	Sspon.01G0028940-1A	Chr1A	100859750	100870900	SsHB90-1	Sspon.07G0014230-1A	Chr7A	51352113	51359292
SsHB22-1	Sspon.01G0028940-1A	Chr1A	100859750	100870900	SsHB90-3	Sspon.07G0014230-2B	Chr7B	56730087	56737098
SsHB22-2	Sspon.01G0028940-1P	Chr2A	85069426	85075685	SsHB22-6	Sspon.01G0028940-3P	Chr2B	86508108	86514667
SsHB22-2	Sspon.01G0028940-1P	Chr2A	85069426	85075685	SsHB22-5	Sspon.01G0028940-3C	Chr2C	89778503	89785623
SsHB22-2	Sspon.01G0028940-1P	Chr2A	85069426	85075685	SsHB22-8	Sspon.01G0028940-4P	Chr2D	80944889	80956512
SsHB22-2	Sspon.01G0028940-1P	Chr2A	85069426	85075685	SsHB90-1	Sspon.07G0014230-1A	Chr7A	51352113	51359292
SsHB22-6	Sspon.01G0028940-3P	Chr2B	86508108	86514667	SsHB22-5	Sspon.01G0028940-3C	Chr2C	89778503	89785623
SsHB22-6	Sspon.01G0028940-3P	Chr2B	86508108	86514667	SsHB22-8	Sspon.01G0028940-4P	Chr2D	80944889	80956512
SsHB22-7	Sspon.01G0028940-4D	Chr1D	97791631	97798130	SsHB22-6	Sspon.01G0028940-3P	Chr2B	86508108	86514667
SsHB22-7	Sspon.01G0028940-4D	Chr1D	97791631	97798130	SsHB22-5	Sspon.01G0028940-3C	Chr2C	89778503	89785623
SsHB23-1	Sspon.01G0036440-1B	Chr1B	18433427	18435951	SsHB23-3	Sspon.01G0036440-2C	Chr1C	13865494	13867391
SsHB23-1	Sspon.01G0036440-1B	Chr1B	18433427	18435951	SsHB23-4	Sspon.01G0036440-2P	Chr1D	15375330	15377887
SsHB23-2	Sspon.01G0036440-1P	Chr1B	18778983	18781294	SsHB23-3	Sspon.01G0036440-2C	Chr1C	13865494	13867391
SsHB23-2	Sspon.01G0036440-1P	Chr1B	18778983	18781294	SsHB23-4	Sspon.01G0036440-2P	Chr1D	15375330	15377887
SsHB23-3	Sspon.01G0036440-2C	Chr1C	13865494	13867391	SsHB12-3	Sspon.01G0015670-3C	Chr1C	46554600	46556551
SsHB23-3	Sspon.01G0036440-2C	Chr1C	13865494	13867391	SsHB23-4	Sspon.01G0036440-2P	Chr1D	15375330	15377887
SsHB23-4	Sspon.01G0036440-2P	Chr1D	15375330	15377887	SsHB39-5	Sspon.02G0015460-4D	Chr2D	36473028	36475412
SsHB23-4	Sspon.01G0036440-2P	Chr1D	15375330	15377887	SsHB69	Sspon.04G0036740-1D	Chr4D	47002204	47003925
SsHB24	Sspon.01G0037910-1B	Chr1B	26854316	26860140	SsHB22-6	Sspon.01G0028940-3P	Chr2B	86508108	86514667
SsHB24	Sspon.01G0037910-1B	Chr1B	26854316	26860140	SsHB75-2	Sspon.05G0018950-2C	Chr5C	78915298	78920775
SsHB26-1	Sspon.01G0046220-1B	Chr1B	96661265	96662657	SsHB18-2	Sspon.01G0026170-2B	Chr1B	99518247	99527570
SsHB26-1	Sspon.01G0046220-1B	Chr1B	96661265	96662657	SsHB27-2	Sspon.01G0046230-2D	Chr1D	87191345	87196935
SsHB26-2	Sspon.01G0046220-2C	Chr1C	86882942	86884067	SsHB27-2	Sspon.01G0046230-2D	Chr1D	87191345	87196935
SsHB26-2	Sspon.01G0046220-2C	Chr1C	86882942	86884067	SsHB43-1	Sspon.02G0032420-1A	Chr2A	120343207	120345796
SsHB26-2	Sspon.01G0046220-2C	Chr1C	86882942	86884067	SsHB43-3	Sspon.02G0032420-3C	Chr2C	99762075	99764965
SsHB26-2	Sspon.01G0046220-2C	Chr1C	86882942	86884067	SsHB43-4	Sspon.02G0032420-4D	Chr2D	86807950	86813109
SsHB27-2	Sspon.01G0046230-2D	Chr1D	87191345	87196935	SsHB43-1	Sspon.02G0032420-1A	Chr2A	120343207	120345796
SsHB27-2	Sspon.01G0046230-2D	Chr1D	87191345	87196935	SsHB43-3	Sspon.02G0032420-3C	Chr2C	99762075	99764965
SsHB27-2	Sspon.01G0046230-2D	Chr1D	87191345	87196935	SsHB43-4	Sspon.02G0032420-4D	Chr2D	86807950	86813109
SsHB29	Sspon.01G0054630-1C	Chr1C	63810974	63811906	SsHB13-5	Sspon.01G0017610-4D	Chr1D	61580578	61582575
SsHB29	Sspon.01G0054630-1C	Chr1C	63810974	63811906	SsHB7-3	Sspon.01G0004840-3D	Chr1D	11519134	11521135
SsHB30	Sspon.01G0058310-1D	Chr1D	25306847	25309614	SsHB52-3	Sspon.03G0003900-2C	Chr3C	27214753	27218292
SsHB32-1	Sspon.02G0004420-1A	Chr2A	13874439	13875267	SsHB32-3	Sspon.02G0004420-2B	Chr2B	13417480	13418194
SsHB33-1	Sspon.02G0009520-1A	Chr2A	26769388	26770742	SsHB33-3	Sspon.02G0009520-3D	Chr2D	21377463	21379133
SsHB33-2	Sspon.02G0009520-2C	Chr2C	29755211	29756120	SsHB33-3	Sspon.02G0009520-3D	Chr2D	21377463	21379133
SsHB34-1	Sspon.02G0009710-1A	Chr2A	27080303	27085903	SsHB34-5	Sspon.02G0009710-4D	Chr2D	21719920	21726778
SsHB34-2	Sspon.02G0009710-1P	Chr2B	26247601	26254274	SsHB34-5	Sspon.02G0009710-4D	Chr2D	21719920	21726778
SsHB34-3	Sspon.02G0009710-2B	Chr2B	26199180	26205603	SsHB34-5	Sspon.02G0009710-4D	Chr2D	21719920	21726778
SsHB34-5	Sspon.02G0009710-4D	Chr2D	21719920	21726778	SsHB60-3	Sspon.04G0002490-2C	Chr4C	8714968	8717987
SsHB35-1	Sspon.02G0012580-1A	Chr2A	33295470	33296343	SsHB35-5	Sspon.02G0012580-4D	Chr2D	28000030	28000911
SsHB35-2	Sspon.02G0012580-1P	Chr2A	34343020	34343892	SsHB35-5	Sspon.02G0012580-4D	Chr2D	28000030	28000911
SsHB35-2	Sspon.02G0012580-1P	Chr2A	34343020	34343892	SsHB81-1	Sspon.06G0004730-1A	Chr6A	15173895	15174833
SsHB35-2	Sspon.02G0012580-1P	Chr2A	34343020	34343892	SsHB81-3	Sspon.06G0004730-2B	Chr6B	12150154	12150782
SsHB35-2	Sspon.02G0012580-1P	Chr2A	34343020	34343892	SsHB81-4	Sspon.06G0004730-3C	Chr6C	13267149	13268078
SsHB35-3	Sspon.02G0012580-2B	Chr2B	31859363	31861066	SsHB35-5	Sspon.02G0012580-4D	Chr2D	28000030	28000911
SsHB35-3	Sspon.02G0012580-2B	Chr2B	31859363	31861066	SsHB81-3	Sspon.06G0004730-2B	Chr6B	12150154	12150782
SsHB35-4	Sspon.02G0012580-3C	Chr2C	37279632	37280507	SsHB35-5	Sspon.02G0012580-4D	Chr2D	28000030	28000911
SsHB35-4	Sspon.02G0012580-3C	Chr2C	37279632	37280507	SsHB81-1	Sspon.06G0004730-1A	Chr6A	15173895	15174833
SsHB35-4	Sspon.02G0012580-3C	Chr2C	37279632	37280507	SsHB81-3	Sspon.06G0004730-2B	Chr6B	12150154	12150782
SsHB35-4	Sspon.02G0012580-3C	Chr2C	37279632	37280507	SsHB81-4	Sspon.06G0004730-3C	Chr6C	13267149	13268078
SsHB35-5	Sspon.02G0012580-4D	Chr2D	28000030	28000911	SsHB81-1	Sspon.06G0004730-1A	Chr6A	15173895	15174833
SsHB35-5	Sspon.02G0012580-4D	Chr2D	28000030	28000911	SsHB81-3	Sspon.06G0004730-2B	Chr6B	12150154	12150782
SsHB35-5	Sspon.02G0012580-4D	Chr2D	28000030	28000911	SsHB81-4	Sspon.06G0004730-3C	Chr6C	13267149	13268078
SsHB36-1	Sspon.02G0012640-1A	Chr2A	33560718	33562073	SsHB32-3	Sspon.02G0004420-2B	Chr2B	13417480	13418194
SsHB36-1	Sspon.02G0012640-1A	Chr2A	33560718	33562073	SsHB69	Sspon.04G0036740-1D	Chr4D	47002204	47003925
SsHB36-1	Sspon.02G0012640-1A	Chr2A	33560718	33562073	SsHB36-4	Sspon.02G0012640-2P	Chr6A	1878815	1879697
SsHB36-3	Sspon.02G0012640-2B	Chr2B	31626659	31628819	SsHB61-2	Sspon.04G0004340-2B	Chr4B	8350958	8352376
SsHB36-3	Sspon.02G0012640-2B	Chr2B	31626659	31628819	SsHB61-3	Sspon.04G0004340-3C	Chr4C	13204950	13207184
SsHB36-3	Sspon.02G0012640-2B	Chr2B	31626659	31628819	SsHB36-4	Sspon.02G0012640-2P	Chr6A	1878815	1879697
SsHB37-1	Sspon.02G0013660-1A	Chr2A	36355381	36357172	SsHB37-4	Sspon.02G0013660-2P	Chr6C	15487632	15489045
SsHB37-1	Sspon.02G0013660-1A	Chr2A	36355381	36357172	SsHB37-5	Sspon.02G0013660-3D	Chr6D	14724955	14726674
SsHB37-3	Sspon.02G0013660-2C	Chr2C	38766521	38767920	SsHB37-4	Sspon.02G0013660-2P	Chr6C	15487632	15489045
SsHB37-3	Sspon.02G0013660-2C	Chr2C	38766521	38767920	SsHB37-5	Sspon.02G0013660-3D	Chr6D	14724955	14726674
SsHB38-1	Sspon.02G0014690-1A	Chr2A	39233857	39234945	SsHB38-5	Sspon.02G0014690-3C	Chr2C	42077687	42078784
SsHB38-1	Sspon.02G0014690-1A	Chr2A	39233857	39234945	SsHB38-7	Sspon.02G0014690-4D	Chr2D	33055753	33056862
SsHB38-1	Sspon.02G0014690-1A	Chr2A	39233857	39234945	SsHB38-2	Sspon.02G0014690-1P	Chr6A	19418050	19419174
SsHB38-1	Sspon.02G0014690-1A	Chr2A	39233857	39234945	SsHB38-4	Sspon.02G0014690-2P	Chr6B	17309952	17311082
SsHB38-1	Sspon.02G0014690-1A	Chr2A	39233857	39234945	SsHB38-6	Sspon.02G0014690-3P	Chr6C	18098028	18099179
SsHB38-2	Sspon.02G0014690-1P	Chr6A	19418050	19419174	SsHB38-4	Sspon.02G0014690-2P	Chr6B	17309952	17311082
SsHB38-2	Sspon.02G0014690-1P	Chr6A	19418050	19419174	SsHB38-6	Sspon.02G0014690-3P	Chr6C	18098028	18099179
SsHB38-3	Sspon.02G0014690-2B	Chr2B	37346764	37347870	SsHB38-5	Sspon.02G0014690-3C	Chr2C	42077687	42078784
SsHB38-3	Sspon.02G0014690-2B	Chr2B	37346764	37347870	SsHB38-7	Sspon.02G0014690-4D	Chr2D	33055753	33056862
SsHB38-3	Sspon.02G0014690-2B	Chr2B	37346764	37347870	SsHB38-2	Sspon.02G0014690-1P	Chr6A	19418050	19419174
SsHB38-3	Sspon.02G0014690-2B	Chr2B	37346764	37347870	SsHB38-4	Sspon.02G0014690-2P	Chr6B	17309952	17311082
SsHB38-3	Sspon.02G0014690-2B	Chr2B	37346764	37347870	SsHB38-6	Sspon.02G0014690-3P	Chr6C	18098028	18099179
SsHB38-5	Sspon.02G0014690-3C	Chr2C	42077687	42078784	SsHB38-7	Sspon.02G0014690-4D	Chr2D	33055753	33056862
SsHB38-5	Sspon.02G0014690-3C	Chr2C	42077687	42078784	SsHB38-2	Sspon.02G0014690-1P	Chr6A	19418050	19419174
SsHB38-5	Sspon.02G0014690-3C	Chr2C	42077687	42078784	SsHB38-4	Sspon.02G0014690-2P	Chr6B	17309952	17311082
SsHB38-5	Sspon.02G0014690-3C	Chr2C	42077687	42078784	SsHB38-6	Sspon.02G0014690-3P	Chr6C	18098028	18099179
SsHB38-7	Sspon.02G0014690-4D	Chr2D	33055753	33056862	SsHB38-2	Sspon.02G0014690-1P	Chr6A	19418050	19419174
SsHB38-7	Sspon.02G0014690-4D	Chr2D	33055753	33056862	SsHB38-4	Sspon.02G0014690-2P	Chr6B	17309952	17311082
SsHB38-7	Sspon.02G0014690-4D	Chr2D	33055753	33056862	SsHB38-6	Sspon.02G0014690-3P	Chr6C	18098028	18099179
SsHB39-1	Sspon.02G0015460-1A	Chr2A	42207891	42209518	SsHB39-4	Sspon.02G0015460-3C	Chr2C	46186261	46192018
SsHB39-1	Sspon.02G0015460-1A	Chr2A	42207891	42209518	SsHB39-5	Sspon.02G0015460-4D	Chr2D	36473028	36475412
SsHB39-1	Sspon.02G0015460-1A	Chr2A	42207891	42209518	SsHB85-1	Sspon.06G0021910-1B	Chr6B	21020262	21024356
SsHB39-3	Sspon.02G0015460-2B	Chr2B	40632010	40634656	SsHB39-4	Sspon.02G0015460-3C	Chr2C	46186261	46192018
SsHB39-3	Sspon.02G0015460-2B	Chr2B	40632010	40634656	SsHB39-5	Sspon.02G0015460-4D	Chr2D	36473028	36475412
SsHB39-3	Sspon.02G0015460-2B	Chr2B	40632010	40634656	SsHB85-1	Sspon.06G0021910-1B	Chr6B	21020262	21024356
SsHB39-4	Sspon.02G0015460-3C	Chr2C	46186261	46192018	SsHB39-5	Sspon.02G0015460-4D	Chr2D	36473028	36475412
SsHB39-5	Sspon.02G0015460-4D	Chr2D	36473028	36475412	SsHB85-1	Sspon.06G0021910-1B	Chr6B	21020262	21024356
SsHB40-1	Sspon.02G0016800-1A	Chr2A	47112832	47119355	SsHB40-3	Sspon.02G0016800-3D	Chr2D	49247847	49254573
SsHB40-1	Sspon.02G0016800-1A	Chr2A	47112832	47119355	SsHB78-2	Sspon.05G0028700-2C	Chr5C	66640261	66644778
SsHB40-2	Sspon.02G0016800-2B	Chr2B	44851837	44858125	SsHB40-3	Sspon.02G0016800-3D	Chr2D	49247847	49254573
SsHB41-1	Sspon.02G0020150-1A	Chr2A	65795616	65799959	SsHB41-4	Sspon.02G0020150-3C	Chr2C	67393174	67394543
SsHB41-1	Sspon.02G0020150-1A	Chr2A	65795616	65799959	SsHB41-5	Sspon.02G0020150-4D	Chr2D	60857392	60860204
SsHB41-2	Sspon.02G0020150-1T	Chr2B	65654601	65656861	SsHB41-4	Sspon.02G0020150-3C	Chr2C	67393174	67394543
SsHB41-2	Sspon.02G0020150-1T	Chr2B	65654601	65656861	SsHB41-5	Sspon.02G0020150-4D	Chr2D	60857392	60860204
SsHB42-2	Sspon.02G0031250-1P	Chr2A	114370025	114376321	SsHB47-1	Sspon.02G0045120-1B	Chr2B	108032102	108038372
SsHB42-2	Sspon.02G0031250-1P	Chr2A	114370025	114376321	SsHB42-4	Sspon.02G0031250-3D	Chr2D	91451160	91457846
SsHB43-1	Sspon.02G0032420-1A	Chr2A	120343207	120345796	SsHB43-3	Sspon.02G0032420-3C	Chr2C	99762075	99764965
SsHB43-1	Sspon.02G0032420-1A	Chr2A	120343207	120345796	SsHB43-4	Sspon.02G0032420-4D	Chr2D	86807950	86813109
SsHB43-1	Sspon.02G0032420-1A	Chr2A	120343207	120345796	SsHB98-4	Sspon.08G0007230-3C	Chr8C	23465526	23467372
SsHB47-1	Sspon.02G0045120-1B	Chr2B	108032102	108038372	SsHB42-4	Sspon.02G0031250-3D	Chr2D	91451160	91457846
SsHB50-1	Sspon.03G0002400-1A	Chr3A	6063521	6064285	SsHB52-2	Sspon.03G0003900-1P	Chr3C	26495971	26499512
SsHB50-1	Sspon.03G0002400-1A	Chr3A	6063521	6064285	SsHB52-3	Sspon.03G0003900-2C	Chr3C	27214753	27218292
SsHB51-1	Sspon.03G0002740-1A	Chr3A	6558600	6562823	SsHB51-3	Sspon.03G0002740-3D	Chr3D	14709106	14714380
SsHB51-1	Sspon.03G0002740-1A	Chr3A	6558600	6562823	SsHB89-1	Sspon.07G0006620-1A	Chr7A	17045449	17049156
SsHB51-1	Sspon.03G0002740-1A	Chr3A	6558600	6562823	SsHB89-3	Sspon.07G0006620-2C	Chr7C	12365417	12369786
SsHB51-2	Sspon.03G0002740-2C	Chr3C	22366286	22371456	SsHB51-3	Sspon.03G0002740-3D	Chr3D	14709106	14714380
SsHB51-2	Sspon.03G0002740-2C	Chr3C	22366286	22371456	SsHB89-1	Sspon.07G0006620-1A	Chr7A	17045449	17049156
SsHB51-2	Sspon.03G0002740-2C	Chr3C	22366286	22371456	SsHB89-3	Sspon.07G0006620-2C	Chr7C	12365417	12369786
SsHB51-3	Sspon.03G0002740-3D	Chr3D	14709106	14714380	SsHB89-1	Sspon.07G0006620-1A	Chr7A	17045449	17049156
SsHB51-3	Sspon.03G0002740-3D	Chr3D	14709106	14714380	SsHB89-3	Sspon.07G0006620-2C	Chr7C	12365417	12369786
SsHB53-1	Sspon.03G0006030-1A	Chr3A	16774968	16777481	SsHB53-3	Sspon.03G0006030-3C	Chr3C	32032458	32034979
SsHB53-1	Sspon.03G0006030-1A	Chr3A	16774968	16777481	SsHB53-4	Sspon.03G0006030-4D	Chr3D	21137937	21140682
SsHB53-2	Sspon.03G0006030-2B	Chr3B	24037884	24044731	SsHB53-3	Sspon.03G0006030-3C	Chr3C	32032458	32034979
SsHB53-2	Sspon.03G0006030-2B	Chr3B	24037884	24044731	SsHB53-4	Sspon.03G0006030-4D	Chr3D	21137937	21140682
SsHB57-1	Sspon.03G0039890-1C	Chr3C	23061041	23063260	SsHB52-3	Sspon.03G0003900-2C	Chr3C	27214753	27218292
SsHB60-1	Sspon.04G0002490-1A	Chr4A	7538631	7540491	SsHB60-3	Sspon.04G0002490-2C	Chr4C	8714968	8717987
SsHB61-1	Sspon.04G0004340-1A	Chr4A	13005292	13007200	SsHB61-2	Sspon.04G0004340-2B	Chr4B	8350958	8352376
SsHB61-1	Sspon.04G0004340-1A	Chr4A	13005292	13007200	SsHB61-3	Sspon.04G0004340-3C	Chr4C	13204950	13207184
SsHB61-1	Sspon.04G0004340-1A	Chr4A	13005292	13007200	SsHB61-4	Sspon.04G0004340-4D	Chr4D	13784409	13834772
SsHB61-1	Sspon.04G0004340-1A	Chr4A	13005292	13007200	SsHB69	Sspon.04G0036740-1D	Chr4D	47002204	47003925
SsHB61-2	Sspon.04G0004340-2B	Chr4B	8350958	8352376	SsHB61-3	Sspon.04G0004340-3C	Chr4C	13204950	13207184
SsHB61-2	Sspon.04G0004340-2B	Chr4B	8350958	8352376	SsHB61-4	Sspon.04G0004340-4D	Chr4D	13784409	13834772
SsHB61-2	Sspon.04G0004340-2B	Chr4B	8350958	8352376	SsHB36-4	Sspon.02G0012640-2P	Chr6A	1878815	1879697
SsHB62-1	Sspon.04G0007240-1A	Chr4A	20721049	20722937	SsHB69	Sspon.04G0036740-1D	Chr4D	47002204	47003925
SsHB62-1	Sspon.04G0007240-1A	Chr4A	20721049	20722937	SsHB62-2	Sspon.04G0007240-1P	Chr5A	19642960	19643875
SsHB62-1	Sspon.04G0007240-1A	Chr4A	20721049	20722937	SsHB62-4	Sspon.04G0007240-2P	Chr5B	13434716	13435703
SsHB62-1	Sspon.04G0007240-1A	Chr4A	20721049	20722937	SsHB62-6	Sspon.04G0007240-3P	Chr5C	11233704	11235121
SsHB62-1	Sspon.04G0007240-1A	Chr4A	20721049	20722937	SsHB62-7	Sspon.04G0007240-4D	Chr5D	20920046	20921537
SsHB62-2	Sspon.04G0007240-1P	Chr5A	19642960	19643875	SsHB73-2	Sspon.05G0005870-2B	Chr5B	12853335	12854831
SsHB62-2	Sspon.04G0007240-1P	Chr5A	19642960	19643875	SsHB62-6	Sspon.04G0007240-3P	Chr5C	11233704	11235121
SsHB62-2	Sspon.04G0007240-1P	Chr5A	19642960	19643875	SsHB62-7	Sspon.04G0007240-4D	Chr5D	20920046	20921537
SsHB62-2	Sspon.04G0007240-1P	Chr5A	19642960	19643875	SsHB73-4	Sspon.05G0005870-4D	Chr5D	20353868	20355178
SsHB62-4	Sspon.04G0007240-2P	Chr5B	13434716	13435703	SsHB62-6	Sspon.04G0007240-3P	Chr5C	11233704	11235121
SsHB62-4	Sspon.04G0007240-2P	Chr5B	13434716	13435703	SsHB62-7	Sspon.04G0007240-4D	Chr5D	20920046	20921537
SsHB62-5	Sspon.04G0007240-3C	Chr4C	20317426	20318962	SsHB62-2	Sspon.04G0007240-1P	Chr5A	19642960	19643875
SsHB62-5	Sspon.04G0007240-3C	Chr4C	20317426	20318962	SsHB62-4	Sspon.04G0007240-2P	Chr5B	13434716	13435703
SsHB62-5	Sspon.04G0007240-3C	Chr4C	20317426	20318962	SsHB62-6	Sspon.04G0007240-3P	Chr5C	11233704	11235121
SsHB62-5	Sspon.04G0007240-3C	Chr4C	20317426	20318962	SsHB62-7	Sspon.04G0007240-4D	Chr5D	20920046	20921537
SsHB63-1	Sspon.04G0010140-1A	Chr4A	30296927	30304802	SsHB95-2	Sspon.08G0002490-2C	Chr8C	5470305	5473417
SsHB64-1	Sspon.04G0018340-1A	Chr4A	66100151	66100997	SsHB64-5	Sspon.04G0018340-3C	Chr4C	71538418	71539261
SsHB64-1	Sspon.04G0018340-1A	Chr4A	66100151	66100997	SsHB64-6	Sspon.04G0018340-4D	Chr4D	75248049	75248899
SsHB64-1	Sspon.04G0018340-1A	Chr4A	66100151	66100997	SsHB95-1	Sspon.08G0002490-1A	Chr8A	7339759	7340765
SsHB64-1	Sspon.04G0018340-1A	Chr4A	66100151	66100997	SsHB96-2	Sspon.08G0002500-2B	Chr8B	3924537	3931029
SsHB64-1	Sspon.04G0018340-1A	Chr4A	66100151	66100997	SsHB95-2	Sspon.08G0002490-2C	Chr8C	5470305	5473417
SsHB64-1	Sspon.04G0018340-1A	Chr4A	66100151	66100997	SsHB95-3	Sspon.08G0002490-3D	Chr8D	5545318	5546325
SsHB64-3	Sspon.04G0018340-2B	Chr4B	69495560	69496418	SsHB64-5	Sspon.04G0018340-3C	Chr4C	71538418	71539261
SsHB64-3	Sspon.04G0018340-2B	Chr4B	69495560	69496418	SsHB64-6	Sspon.04G0018340-4D	Chr4D	75248049	75248899
SsHB64-3	Sspon.04G0018340-2B	Chr4B	69495560	69496418	SsHB96-2	Sspon.08G0002500-2B	Chr8B	3924537	3931029
SsHB64-3	Sspon.04G0018340-2B	Chr4B	69495560	69496418	SsHB95-3	Sspon.08G0002490-3D	Chr8D	5545318	5546325
SsHB64-5	Sspon.04G0018340-3C	Chr4C	71538418	71539261	SsHB64-6	Sspon.04G0018340-4D	Chr4D	75248049	75248899
SsHB64-5	Sspon.04G0018340-3C	Chr4C	71538418	71539261	SsHB73-2	Sspon.05G0005870-2B	Chr5B	12853335	12854831
SsHB64-5	Sspon.04G0018340-3C	Chr4C	71538418	71539261	SsHB62-7	Sspon.04G0007240-4D	Chr5D	20920046	20921537
SsHB64-5	Sspon.04G0018340-3C	Chr4C	71538418	71539261	SsHB73-4	Sspon.05G0005870-4D	Chr5D	20353868	20355178
SsHB64-5	Sspon.04G0018340-3C	Chr4C	71538418	71539261	SsHB95-3	Sspon.08G0002490-3D	Chr8D	5545318	5546325
SsHB64-6	Sspon.04G0018340-4D	Chr4D	75248049	75248899	SsHB62-2	Sspon.04G0007240-1P	Chr5A	19642960	19643875
SsHB64-6	Sspon.04G0018340-4D	Chr4D	75248049	75248899	SsHB62-4	Sspon.04G0007240-2P	Chr5B	13434716	13435703
SsHB64-6	Sspon.04G0018340-4D	Chr4D	75248049	75248899	SsHB95-1	Sspon.08G0002490-1A	Chr8A	7339759	7340765
SsHB64-6	Sspon.04G0018340-4D	Chr4D	75248049	75248899	SsHB96-2	Sspon.08G0002500-2B	Chr8B	3924537	3931029
SsHB64-6	Sspon.04G0018340-4D	Chr4D	75248049	75248899	SsHB95-2	Sspon.08G0002490-2C	Chr8C	5470305	5473417
SsHB64-6	Sspon.04G0018340-4D	Chr4D	75248049	75248899	SsHB95-3	Sspon.08G0002490-3D	Chr8D	5545318	5546325
SsHB66-1	Sspon.04G0027350-1B	Chr4B	58492333	58494352	SsHB66-3	Sspon.04G0027350-3D	Chr4D	62587590	62589469
SsHB66-1	Sspon.04G0027350-1B	Chr4B	58492333	58494352	SsHB98-1	Sspon.08G0007230-1A	Chr8A	22898592	22900438
SsHB66-1	Sspon.04G0027350-1B	Chr4B	58492333	58494352	SsHB98-3	Sspon.08G0007230-2B	Chr8B	20889641	20891116
SsHB66-1	Sspon.04G0027350-1B	Chr4B	58492333	58494352	SsHB98-4	Sspon.08G0007230-3C	Chr8C	23465526	23467372
SsHB66-1	Sspon.04G0027350-1B	Chr4B	58492333	58494352	SsHB98-5	Sspon.08G0007230-4D	Chr8D	20402542	20404669
SsHB66-2	Sspon.04G0027350-2C	Chr4C	60789294	60791215	SsHB66-3	Sspon.04G0027350-3D	Chr4D	62587590	62589469
SsHB66-2	Sspon.04G0027350-2C	Chr4C	60789294	60791215	SsHB98-3	Sspon.08G0007230-2B	Chr8B	20889641	20891116
SsHB66-2	Sspon.04G0027350-2C	Chr4C	60789294	60791215	SsHB98-5	Sspon.08G0007230-4D	Chr8D	20402542	20404669
SsHB66-3	Sspon.04G0027350-3D	Chr4D	62587590	62589469	SsHB75-3	Sspon.05G0018950-3D	Chr5D	76085907	76089307
SsHB66-3	Sspon.04G0027350-3D	Chr4D	62587590	62589469	SsHB98-1	Sspon.08G0007230-1A	Chr8A	22898592	22900438
SsHB66-3	Sspon.04G0027350-3D	Chr4D	62587590	62589469	SsHB98-3	Sspon.08G0007230-2B	Chr8B	20889641	20891116
SsHB66-3	Sspon.04G0027350-3D	Chr4D	62587590	62589469	SsHB98-4	Sspon.08G0007230-3C	Chr8C	23465526	23467372
SsHB66-3	Sspon.04G0027350-3D	Chr4D	62587590	62589469	SsHB98-5	Sspon.08G0007230-4D	Chr8D	20402542	20404669
SsHB71-1	Sspon.05G0002350-1A	Chr5A	7174794	7175663	SsHB71-3	Sspon.05G0002350-3C	Chr5C	6899124	6899993
SsHB71-1	Sspon.05G0002350-1A	Chr5A	7174794	7175663	SsHB71-4	Sspon.05G0002350-4D	Chr5D	6518129	6518593
SsHB71-2	Sspon.05G0002350-2B	Chr5B	2460643	2461522	SsHB71-3	Sspon.05G0002350-3C	Chr5C	6899124	6899993
SsHB71-2	Sspon.05G0002350-2B	Chr5B	2460643	2461522	SsHB71-4	Sspon.05G0002350-4D	Chr5D	6518129	6518593
SsHB72-1	Sspon.05G0003250-1A	Chr5A	9715919	9723257	SsHB80-1	Sspon.05G0030790-1C	Chr5C	962383	968136
SsHB72-1	Sspon.05G0003250-1A	Chr5A	9715919	9723257	SsHB80-2	Sspon.05G0030790-2D	Chr5D	10009172	10015534
SsHB73-1	Sspon.05G0005870-1A	Chr5A	18639515	18640821	SsHB73-2	Sspon.05G0005870-2B	Chr5B	12853335	12854831
SsHB73-1	Sspon.05G0005870-1A	Chr5A	18639515	18640821	SsHB62-4	Sspon.04G0007240-2P	Chr5B	13434716	13435703
SsHB73-1	Sspon.05G0005870-1A	Chr5A	18639515	18640821	SsHB73-3	Sspon.05G0005870-3C	Chr5C	10556900	10558311
SsHB73-1	Sspon.05G0005870-1A	Chr5A	18639515	18640821	SsHB73-4	Sspon.05G0005870-4D	Chr5D	20353868	20355178
SsHB73-1	Sspon.05G0005870-1A	Chr5A	18639515	18640821	SsHB62-7	Sspon.04G0007240-4D	Chr5D	20920046	20921537
SsHB73-2	Sspon.05G0005870-2B	Chr5B	12853335	12854831	SsHB73-3	Sspon.05G0005870-3C	Chr5C	10556900	10558311
SsHB73-2	Sspon.05G0005870-2B	Chr5B	12853335	12854831	SsHB73-4	Sspon.05G0005870-4D	Chr5D	20353868	20355178
SsHB74-1	Sspon.05G0016920-1A	Chr5A	70238419	70239702	SsHB74-4	Sspon.05G0016920-4D	Chr5D	66125315	66126604
SsHB74-1	Sspon.05G0016920-1A	Chr5A	70238419	70239702	SsHB91-2	Sspon.07G0020510-2B	Chr7B	79829613	79832254
SsHB74-1	Sspon.05G0016920-1A	Chr5A	70238419	70239702	SsHB91-3	Sspon.07G0020510-3D	Chr7D	67449866	67451720
SsHB74-3	Sspon.05G0016920-3C	Chr5C	65510371	65511672	SsHB74-4	Sspon.05G0016920-4D	Chr5D	66125315	66126604
SsHB74-3	Sspon.05G0016920-3C	Chr5C	65510371	65511672	SsHB91-2	Sspon.07G0020510-2B	Chr7B	79829613	79832254
SsHB74-3	Sspon.05G0016920-3C	Chr5C	65510371	65511672	SsHB91-3	Sspon.07G0020510-3D	Chr7D	67449866	67451720
SsHB74-4	Sspon.05G0016920-4D	Chr5D	66125315	66126604	SsHB91-2	Sspon.07G0020510-2B	Chr7B	79829613	79832254
SsHB74-4	Sspon.05G0016920-4D	Chr5D	66125315	66126604	SsHB93-1	Sspon.07G0030100-1C	Chr7C	2098888	2100723
SsHB74-4	Sspon.05G0016920-4D	Chr5D	66125315	66126604	SsHB91-3	Sspon.07G0020510-3D	Chr7D	67449866	67451720
SsHB75-1	Sspon.05G0018950-1A	Chr5A	80866648	80868841	SsHB75-2	Sspon.05G0018950-2C	Chr5C	78915298	78920775
SsHB75-1	Sspon.05G0018950-1A	Chr5A	80866648	80868841	SsHB75-3	Sspon.05G0018950-3D	Chr5D	76085907	76089307
SsHB81-1	Sspon.06G0004730-1A	Chr6A	15173895	15174833	SsHB81-3	Sspon.06G0004730-2B	Chr6B	12150154	12150782
SsHB81-1	Sspon.06G0004730-1A	Chr6A	15173895	15174833	SsHB81-4	Sspon.06G0004730-3C	Chr6C	13267149	13268078
SsHB83-1	Sspon.06G0011860-1A	Chr6A	64411787	64416083	SsHB83-2	Sspon.06G0011860-2B	Chr6B	52339400	52344525
SsHB83-1	Sspon.06G0011860-1A	Chr6A	64411787	64416083	SsHB83-3	Sspon.06G0011860-3C	Chr6C	51835545	51839931
SsHB83-1	Sspon.06G0011860-1A	Chr6A	64411787	64416083	SsHB83-4	Sspon.06G0011860-4D	Chr6D	47137445	47142933
SsHB83-2	Sspon.06G0011860-2B	Chr6B	52339400	52344525	SsHB83-3	Sspon.06G0011860-3C	Chr6C	51835545	51839931
SsHB83-2	Sspon.06G0011860-2B	Chr6B	52339400	52344525	SsHB83-4	Sspon.06G0011860-4D	Chr6D	47137445	47142933
SsHB87-1	Sspon.07G0001390-1A	Chr7A	3216549	3220991	SsHB93-1	Sspon.07G0030100-1C	Chr7C	2098888	2100723
SsHB87-1	Sspon.07G0001390-1A	Chr7A	3216549	3220991	SsHB87-2	Sspon.07G0001390-2D	Chr7D	2628276	2632718
SsHB88-1	Sspon.07G0004110-1A	Chr7A	10066853	10070720	SsHB92-4	Sspon.07G0022560-2P	Chr7C	6277627	6280379
SsHB88-1	Sspon.07G0004110-1A	Chr7A	10066853	10070720	SsHB88-2	Sspon.07G0004110-2D	Chr7D	9386285	9391581
SsHB90-1	Sspon.07G0014230-1A	Chr7A	51352113	51359292	SsHB90-3	Sspon.07G0014230-2B	Chr7B	56730087	56737098
SsHB90-1	Sspon.07G0014230-1A	Chr7A	51352113	51359292	SsHB90-5	Sspon.07G0014230-3D	Chr7D	50817090	50823911
SsHB90-2	Sspon.07G0014230-1P	Chr3A	49213286	49220825	SsHB90-1	Sspon.07G0014230-1A	Chr7A	51352113	51359292
SsHB90-2	Sspon.07G0014230-1P	Chr3A	49213286	49220825	SsHB90-3	Sspon.07G0014230-2B	Chr7B	56730087	56737098
SsHB90-2	Sspon.07G0014230-1P	Chr3A	49213286	49220825	SsHB90-5	Sspon.07G0014230-3D	Chr7D	50817090	50823911
SsHB90-4	Sspon.07G0014230-2P	Chr3B	73420859	73428064	SsHB90-1	Sspon.07G0014230-1A	Chr7A	51352113	51359292
SsHB90-4	Sspon.07G0014230-2P	Chr3B	73420859	73428064	SsHB90-3	Sspon.07G0014230-2B	Chr7B	56730087	56737098
SsHB90-4	Sspon.07G0014230-2P	Chr3B	73420859	73428064	SsHB90-3	Sspon.07G0014230-2B	Chr7B	56730087	56737098
SsHB90-4	Sspon.07G0014230-2P	Chr3B	73420859	73428064	SsHB90-5	Sspon.07G0014230-3D	Chr7D	50817090	50823911
SsHB91-1	Sspon.07G0020510-1A	Chr7A	76441223	76442206	SsHB91-2	Sspon.07G0020510-2B	Chr7B	79829613	79832254
SsHB91-1	Sspon.07G0020510-1A	Chr7A	76441223	76442206	SsHB91-3	Sspon.07G0020510-3D	Chr7D	67449866	67451720
SsHB93-1	Sspon.07G0030100-1C	Chr7C	2098888	2100723	SsHB87-2	Sspon.07G0001390-2D	Chr7D	2628276	2632718
SsHB93-1	Sspon.07G0030100-1C	Chr7C	2098888	2100723	SsHB91-3	Sspon.07G0020510-3D	Chr7D	67449866	67451720
SsHB95-1	Sspon.08G0002490-1A	Chr8A	7339759	7340765	SsHB96-2	Sspon.08G0002500-2B	Chr8B	3924537	3931029
SsHB95-1	Sspon.08G0002490-1A	Chr8A	7339759	7340765	SsHB95-2	Sspon.08G0002490-2C	Chr8C	5470305	5473417
SsHB95-1	Sspon.08G0002490-1A	Chr8A	7339759	7340765	SsHB95-3	Sspon.08G0002490-3D	Chr8D	5545318	5546325
SsHB96-2	Sspon.08G0002500-2B	Chr8B	3924537	3931029	SsHB95-2	Sspon.08G0002490-2C	Chr8C	5470305	5473417
SsHB96-2	Sspon.08G0002500-2B	Chr8B	3924537	3931029	SsHB95-3	Sspon.08G0002490-3D	Chr8D	5545318	5546325
SsHB97-1	Sspon.08G0004940-1A	Chr8A	14396878	14400069	SsHB101-1	Sspon.08G0019390-1B	Chr8B	11907804	11911478
SsHB97-3	Sspon.08G0004940-2B	Chr4B	65002366	65005199	SsHB97-5	Sspon.08G0004940-3C	Chr4C	80032216	80035643
SsHB97-3	Sspon.08G0004940-2B	Chr4B	65002366	65005199	SsHB97-6	Sspon.08G0004940-4D	Chr4D	70245004	70248467
SsHB97-3	Sspon.08G0004940-2B	Chr4B	65002366	65005199	SsHB97-1	Sspon.08G0004940-1A	Chr8A	14396878	14400069
SsHB97-3	Sspon.08G0004940-2B	Chr4B	65002366	65005199	SsHB101-1	Sspon.08G0019390-1B	Chr8B	11907804	11911478
SsHB97-4	Sspon.08G0004940-2P	Chr4C	67421159	67424741	SsHB97-5	Sspon.08G0004940-3C	Chr4C	80032216	80035643
SsHB97-4	Sspon.08G0004940-2P	Chr4C	67421159	67424741	SsHB97-6	Sspon.08G0004940-4D	Chr4D	70245004	70248467
SsHB97-4	Sspon.08G0004940-2P	Chr4C	67421159	67424741	SsHB97-1	Sspon.08G0004940-1A	Chr8A	14396878	14400069
SsHB97-6	Sspon.08G0004940-4D	Chr4D	70245004	70248467	SsHB97-1	Sspon.08G0004940-1A	Chr8A	14396878	14400069
SsHB97-6	Sspon.08G0004940-4D	Chr4D	70245004	70248467	SsHB101-1	Sspon.08G0019390-1B	Chr8B	11907804	11911478
SsHB98-1	Sspon.08G0007230-1A	Chr8A	22898592	22900438	SsHB98-3	Sspon.08G0007230-2B	Chr8B	20889641	20891116
SsHB98-1	Sspon.08G0007230-1A	Chr8A	22898592	22900438	SsHB103-2	Sspon.08G0024350-1P	Chr8B	63352327	63356325
SsHB98-1	Sspon.08G0007230-1A	Chr8A	22898592	22900438	SsHB98-4	Sspon.08G0007230-3C	Chr8C	23465526	23467372
SsHB98-1	Sspon.08G0007230-1A	Chr8A	22898592	22900438	SsHB98-5	Sspon.08G0007230-4D	Chr8D	20402542	20404669
SsHB98-3	Sspon.08G0007230-2B	Chr8B	20889641	20891116	SsHB98-4	Sspon.08G0007230-3C	Chr8C	23465526	23467372
SsHB98-3	Sspon.08G0007230-2B	Chr8B	20889641	20891116	SsHB98-5	Sspon.08G0007230-4D	Chr8D	20402542	20404669
SsHB99-1	Sspon.08G0015810-1A	Chr8A	63124987	63125984	SsHB99-2	Sspon.08G0015810-2B	Chr8B	57680913	57682026
SsHB99-1	Sspon.08G0015810-1A	Chr8A	63124987	63125984	SsHB23-5	Sspon.01G0036440-3D	Chr8D	48451851	48453287
