# Supplementary material for: Expression Profiling and MicroRNA Regulatory Networks of Homeobox Family Genes in Sugarcane Saccharum spontaneum L
Source: Int J Mol Sci. 2022 Aug 5;23(15):8724. doi: 10.3390/ijms23158724 (PMC9369071; doi:10.3390/ijms23158724)
Supplement: Supplementary file 1 [file ijms-23-08724-s001.zip › Supplementary file 9.xlsx]

## Sheet: Sheet1
Supplementary Table S4 Motif sequence identification by MEME tools and domain prediction of SsHB and SbHB proteins
Motifs	Motifs sequence	Predicted domain
1	PRQVKNWFQNRRARLKKKQEEE	Homeodomain (PF00046)
2	FKEHPYPSPKQKAQLARZLGL	Homeobox_KN (PF05920)
3	TAVDWVQMPGMKPGPDSIGIIAISHGCSGVAARACGLVSLEPTKVAEILKDRPSWFRDCRSVEVLNVJPAGNGGTIELIYMQTYAPTTLAPARDF	START (PF01852)
4	KKRRLTPEQIEALEAS	HA (PF03457)
5	GGGKGGGGSSSSSDSGANAAAELSTAERQELQNKKAKLLSMLDEVDRRYKQYYHQMQAVVSSFEAVA	POX (PF07526)
6	DCEKLKRCCESLREENRRLQKELAELRALK	HALZ (PF02183)
7	AWRPQRGLPERSVSVLRAWLFE	Unknow
8	RYRECLKNHAAALGGHAVDGCGEFMPSGZEG	ZF-HD_dimer (PF04770)
9	CTDASGSLVVYAPVDIPAMNVVMNGGDPSYVALLPSGFAILPD	Unknow
10	YAVPGLRAGGFMGNQVILPLAHTLEHEEFLEVIRLEGHGLSHEEVLLSRDMFLLQLCSGVDENA	Unknow
11	IQEXPGGYSKVTWVEHAEYDEASVHELYR	START (PF01852)
12	PLYESSKILAQKMTAAALRHJRQIAHESSGEVPYGVGRQPAVLRTFSQRLSRGFNDAVNGFPDDGWS	Unknow
13	ALQLMSAELQVLSPLVPTREVYFLRYCKQHA	START (PF01852)
14	GILCAKASMLLQNVPPAVLVRFLREHRSEWADYNVDAYSAAAL	Unknow
