# Supplementary material for: Expression Profiling and MicroRNA Regulatory Networks of Homeobox Family Genes in Sugarcane Saccharum spontaneum L
Source: Int J Mol Sci. 2022 Aug 5;23(15):8724. doi: 10.3390/ijms23158724 (PMC9369071; doi:10.3390/ijms23158724)
Supplement: Supplementary file 1 [file ijms-23-08724-s001.zip › Supplementary file 10.xlsx]

## Sheet: Sheet1
Supplementary Table S5 Divergence time among 13 subfamilies of SsHBs
Class-Class	Median Ks	Gene pairs used	Divergence time (Mya)		Class-Class	Median Ks	Gene pairs used	Divergence time (Mya)
HD-ZIPⅠ-HD-ZIPⅡ	1.13	1981	92.97		HD-ZIPⅣ-BEL	1.43	1886	117.21
HD-ZIPⅠ-HD-ZIPⅢ	1.73	1080	141.64		HD-ZIPⅣ-PINTOX	2.56	205	209.84
HD-ZIPⅠ-HD-ZIPⅣ	1.14	1845	93.41		HD-ZIPⅣ-PLINC	1.15	1312	94.26
HD-ZIPⅠ-SAWADEE	1.97	271	161.51		SAWADEE-WOX	1.84	150	150.82
HD-ZIPⅠ-WOX	1.1	1125	89.83		SAWADEE-DDT	2.69	36	220.49
HD-ZIPⅠ-DDT	1.85	270	151.64		SAWADEE-NDX	2.73	36	223.77
HD-ZIPⅠ-NDX	2.09	270	171.31		SAWADEE-PHD	3.11	48	254.92
HD-ZIPⅠ-PHD	2.51	360	205.74		SAWADEE-KNOX	2.22	234	181.97
HD-ZIPⅠ-KNOX	1.37	1755	112.13		SAWADEE-BEL	2.56	276	209.84
HD-ZIPⅠ-BEL	1.21	2070	99.18		SAWADEE-PINTOX	2.73	30	223.77
HD-ZIPⅠ-PINTOX	2.63	225	215.57		SAWADEE-PLINC	2.14	192	175.41
HD-ZIPⅠ-PLINC	0.93	1440	75.84		WOX-DDT	2.4	150	196.72
HD-ZIPⅡ-HD-ZIPⅢ	1.77	1056	145.08		WOX-NDX	2.55	150	209.02
HD-ZIPⅡ-HD-ZIPⅣ	1.41	1804	115.57		WOX-PHD	2.53	200	207.38
HD-ZIPⅡ-SAWADEE	1.93	264	158.2		WOX-KNOX	1.15	975	94.26
HD-ZIPⅡ-WOX	1.34	1100	109.84		WOX-BEL	1.43	1150	117.21
HD-ZIPⅡ-DDT	2.07	264	169.67		WOX-PINTOX	2.6	125	213.11
HD-ZIPⅡ-NDX	2.29	264	187.7		WOX-PLINC	1.19	800	97.54
HD-ZIPⅡ-PHD	2.9	352	237.7		DDT-NDX	2.69	36	220.49
HD-ZIPⅡ-KNOX	1.54	1716	126.23		DDT-PHD	2.68	48	219.67
HD-ZIPⅡ-BEL	1.37	2025	112.3		DDT-KNOX	2.09	234	171.31
HD-ZIPⅡ-PINTOX	2.48	220	203.28		DDT-BEL	2.52	276	206.56
HD-ZIPⅡ-PLINC	1.14	1408	93.44		DDT-PINTOX	2.91	30	238.52
HD-ZIPⅢ-HD-ZIPⅣ	2.4	984	196.72		DDT-PLINC	1.91	192	156.56
HD-ZIPⅢ-SAWADEE	2.26	144	185.25		NDX-PHD	2.92	48	239.34
HD-ZIPⅢ-WOX	1.86	600	152.46		NDX-KNOX	2.4	234	196.72
HD-ZIPⅢ-DDT	2.72	144	222.95		NDX-BEL	2.13	276	174.59
HD-ZIPⅢ-NDX	2.5	144	204.92		NDX-PINTOX	2.63	30	215.57
HD-ZIPⅢ-PHD	2.93	192	240.16		NDX-PLINC	1.91	192	156.56
HD-ZIPⅢ-KNOX	2.16	936	177.05		PHD-KNOX	2.34	312	191.8
HD-ZIPⅢ-BEL	2.7	1104	221.31		PHD-BEL	3.1	368	254.1
HD-ZIPⅢ-PINTOX	2.62	120	214.75		PHD-PINTOX	3.28	40	268.85
HD-ZIPⅢ-PLINC	2.15	768	176.23		PHD-PLINC	3.21	256	263.11
HD-ZIPⅣ-SAWADEE	2.47	246	202.46		KNOX-BEL	1.48	1793	121.31
HD-ZIPⅣ-WOX	1.42	1021	116.39		KNOX-PINTOX	2.52	195	206.56
HD-ZIPⅣ-DDT	2.79	246	228.69		KNOX-PLINC	1.28	1248	104.92
HD-ZIPⅣ-NDX	2.32	246	190.16		BEL-PINTOX	2.5	230	204.92
HD-ZIPⅣ-PHD	3.01	328	246.72		BEL-PLINC	1.05	1472	86.07
HD-ZIPⅣ-KNOX	1.7	1599	139.34		PINTOX-PLINC	2.2	160	180.33
