# Supplementary material for: Expression Profiling and MicroRNA Regulatory Networks of Homeobox Family Genes in Sugarcane Saccharum spontaneum L
Source: Int J Mol Sci. 2022 Aug 5;23(15):8724. doi: 10.3390/ijms23158724 (PMC9369071; doi:10.3390/ijms23158724)
Supplement: Supplementary file 1 [file ijms-23-08724-s001.zip › Supplementary file 11.xlsx]

## Sheet: different developmental stages
Supplementary Table 6 Expression profiling of Saccharum HB genes in different tissues at different developmental stages, gradient developmental leaves, and circadian rhythms
			seedling-leaf	seedling-Lstem		pre-m-leaf-roll	pre-m-m-leaf	pre-m-stem-3	pre-m-stem-6/9	pre-m-stem-9/15		m--leaf-roll	m-mature-leaf	m-stem3	m-stem-6/9	m-stem-9/15
BEL	HB3	Ss	169.99	91.56		152.21	167.27	2.16	66.09	89.43		232.6	210.8	28.72	120.43	99.89
		So	57.51	56.43		49.73	61.89	7.72	47.73	64.03		111.86	125.99	54.92	107.48	102.96
	HB5	Ss	20.78	109.83		19.59	10.91	43.91	111.46	57.25		25.73	23.93	61.27	97.6	85.81
		So	29.74	113.74		6.42	9.09	127.75	154.52	147.02		27.37	21.74	96.57	86.72	96.54
	HB18	Ss	57.93	71.07		85.73	87.81	8.5	37.22	47.87		195.81	170.25	17.68	50.92	38.56
		So	110.57	128.85		107.18	100.17	23.83	36.01	44.66		212.71	171.74	53.47	99.08	83.06
	HB24	Ss	29.24	11.11		20.54	16.64	0	5.31	8.92		29.99	37.45	0.3	16.47	16.4
		So	34.9	23.99		25.07	44.58	4.17	15.83	18.16		99.2	106.2	7.66	23.74	18.38
	HB26	Ss	0	4.65		0	0	0.95	0	0		0	0	0.15	0	0
		So	9.75	12.1		9.83	10.64	6.56	5.21	8.5		12.71	8.95	5.28	9.8	12.37
	HB27	Ss	129.38	94.2		80.18	101.1	31.47	98.81	97.93		143.82	138.64	44.43	106	102.9
		So	148.59	208.72		138.9	112.89	88.9	80.12	121.45		253.77	222.43	119.08	200.65	312.6
	HB43	Ss	140.74	176.14		45.88	74.2	33.13	130.58	100.89		126.89	125.55	60.36	143.27	125.97
		So	216.87	296.61		162.6	219.34	117.15	183.23	185.27		239.12	258.57	110.51	203.48	481.12
	HB51	Ss	32.55	56.35		23.49	36.03	21.58	75.28	60.55		27	18.55	42.39	55.04	39.09
		So	7.39	22.75		4.21	3.75	7.18	17.37	12.54		8.85	7.04	28.46	20.78	15.14
	HB66	Ss	0.74	4.56		0	0	2.51	1.35	0		0.2	0.34	1.78	1.08	0.27
		So	1.1	2.3		0.33	0.34	6.62	1	1.05		0.44	0	3.49	0.18	0.8
	HB75	Ss	67.75	51.94		51.86	69.11	14.58	72.23	49.28		441.71	423.61	70.22	166.45	108.46
		So	54.2	45.29		23.08	32.09	90.06	101.76	143.43		320.61	342.99	171.29	240.5	268.66
	HB89	Ss	27.87	56.01		20.88	22.76	55.93	117.66	126.52		41.94	31.63	166.3	154.99	139.67
		So	27.82	43.97		7.65	15.48	60.73	73.38	111.63		46.09	51.81	192.92	226.97	96.25
	HB98	Ss	0.05	8.2		0	0	7.55	0.44	0		0	0	3.09	0.3	0
		So	0.06	1.55		0	0	3.41	0	0		0	0	2.25	0.3	0
	HB103	Ss	126.42	46.7		55.05	25.48	0	3.39	1.24		30.57	28.6	0.09	0.96	0.9
		So	30.21	5.8		8.61	9.46	0	0.24	0		6.69	3.01	0.03	0.42	0
KNOX	HB2	Ss	34.05	260.21		54.02	13.37	35.5	108.39	99.17		14.28	10.69	65.27	184.44	172.38
		So	26.92	219.04		7.87	2.21	115.49	92.91	88.14		5.18	3.26	58.75	78.28	65.09
	HB16	Ss	6.93	37.09		11.53	14.75	41.23	75.34	56.99		30.35	22.45	89.87	52.1	36.52
		So	15.01	47.65		32.26	62.24	128.74	110.96	97.22		10.64	13.5	64.55	75.99	201.43
	HB17	Ss	0.15	2.3		0.81	0.73	3.15	0	0.52		0.34	0.39	6.63	0.24	0
		So	126.87	43.78		40.46	87.63	7.8	3.86	0.89		36.62	34.23	6.86	5.39	0.94
	HB20	Ss	0	3.1		0	0	41.51	59.38	75.95		0	0	70.01	43.88	18.67
		So	0	0		0	0	24.4	53.54	64.44		0	0	95.57	86.62	47.93
	HB21	Ss	0.13	2.78		0	0	30.08	88.03	81.26		0.3	0.89	94.7	65.81	62.86
		So	0	0		0	0	24.4	53.54	64.44		0	0	95.57	86.62	47.93
	HB22	Ss	1.54	12.22		3.51	0	143.94	359.52	376.69		9.88	10.47	245.54	281.08	286.31
		So	0.95	2.78		0	0	149.53	244.13	285.5		0	0	300.28	294.56	241.05
	HB25	Ss	0	0		0	0	0	0	0		0	0	0	0	0
		So	-	-		-	-	-	-	-		-	-	-	-	-
	HB90	Ss	0.6	1.84		0	1.21	72.46	64.02	68.77		0.48	0	98.27	92.11	60.36
		So	0.92	0		0	0	162.84	155.22	188.07		0	0	244.83	200.63	98.89
	HB97	Ss	222.32	166.21		308.98	319.37	140.36	208.94	211.85		455.38	440.5	122.3	175.08	164.77
		So	201.5	149.46		285.97	278.4	178.29	163.03	169.12		533.07	502.16	188.2	191.05	191.84
	HB101	Ss	62.05	57.54		115.29	106.34	66.83	97.3	101.73		154.88	131.52	50.75	75.77	62.48
		So	79.84	55.38		86.44	58.84	37.74	71.6	51.56		147.72	186.29	33.66	73.13	49.23
	HB104	Ss	4.43	4.99		9.71	10.4	6.46	13.73	14.36		29.61	29.4	9.09	13.75	10.21
		So	10.05	8.92		11.22	7.66	0	11.24	6.26		20.91	20.02	3.07	4.26	1.36
HD-ZIPⅠ	HB6	Ss	0.31	6.22		0	0	1.28	5.26	0		0	0	7.96	2.49	0
		So	0.71	16.15		3.34	0	28.17	5.64	1.77		0	0	29.62	0.86	0
	HB7	Ss	12.77	18.18		59.3	9.6	18.56	44.91	32.62		3.79	1.75	53.23	45.65	22.77
		So	7.68	20.66		4.82	0	21.33	16.43	17.07		3.45	2.08	58.63	19.69	10.67
	HB8	Ss	0.29	6.64		3.09	0	17.08	2.72	0		0	0	4.52	3.15	0.78
		So	0.96	3.85		0	0	12.75	1.52	1.59		0	0.28	5.61	0.24	0.8
	HB13	Ss	1.73	69.96		1	0	52.63	24.41	8.6		0	0.22	80.73	6.79	2.86
		So-a	2.1	13.32		0.57	0	10.4	0.58	0		1.11	0	13.53	0.74	0
		So-b	0.17	8.38		0.59	0	8.16	0.88	0		0	0	11.87	0.15	0
	HB28	Ss	15.36	4.42		0	2.42	1.01	0	0		1.24	0.95	2.36	1.38	0.78
		So	2.37	3.99		0	2.26	6.87	1.14	3.69		0	0	5.53	2.3	0.86
	HB29	Ss	6.43	1.99		0	1.35	0	1.43	2.47		0.35	0.56	1.18	0.21	0
		So	-	-		-	-	-	-	-		-	-	-	-	-
	HB32	Ss	0	0.18		0	0	0	0	0		0	0	4.71	1.13	0
		So	0.45	0.18		1.26	0	1.89	0	0		0	0	9.3	0	0
	HB33	Ss	22.3	53.9		21.19	29.95	18.09	56.58	72.13		67.44	74.69	33.84	93.33	105.61
		So	27.76	58.03		17.02	29.48	48.95	91.93	100.91		49.81	57.81	75.34	175.57	256.91
	HB36	Ss	242.83	157.9		46.8	75.88	94.78	41.06	44.39		241.06	268.4	238.15	87.48	68.48
		So	96.6	82.81		34.27	68.13	57.56	17.39	25.53		122.17	159.33	246.32	96.97	61.42
	HB39	Ss	26.77	10.33		16.42	49.26	28.77	83.18	43.18		44.7	45.61	19.84	67.35	30
		So	4.88	3.46		6.17	23.84	12.91	63.41	93.87		16.78	14.93	19.39	33.48	18.35
	HB61	Ss	210.24	334.68		28.39	51.63	83.62	129.52	110.48		329.63	305.03	289.54	492.74	220.15
		So	251.48	298.1		61.34	102.64	394.32	337.14	378.46		405.85	516.33	838.33	781.01	859.47
	HB62	Ss	76.34	5.9		256.44	240.8	265.08	260.47	55.99		516.94	521.93	262.44	191.52	69.77
		So	66.04	9.52		173.63	515.06	728.12	655.77	401.98		406.87	361.37	150.33	893.71	441.46
	HB69	Ss	1.37	0.13		107.5	128.16	203.49	78.38	56.93		9.49	16.71	16.12	20.59	18.34
		So	-	-		-	-	-	-	-		-	-	-	-	-
	HB85	Ss	158.88	111.98		56.57	68.26	66.37	89.71	58.38		87.62	73.65	99.8	136.35	61.62
		So	190.17	96.46		125.49	124.93	63.36	64.44	105.35		97.91	111.21	77.13	81.06	164.42
	HB94	Ss	0	0		0	0	0	0	0		0	0	0	0	0
		So	69.18	51.03		19.41	30.93	26.29	59.53	58.82		98.91	119.72	75.08	117.17	94.97
HD-ZIPⅡ	HB10	Ss	2.83	3.37		11.34	28.95	12.5	17.71	10.95		13.37	16.81	9.43	25.08	15.43
		So	1.95	1.65		14.72	39.75	22.78	3.48	4.41		40.19	53.48	25.45	17.71	12.01
	HB12	Ss	50.63	29.42		21.93	39.93	16.67	53.76	69.5		19.59	29.25	13.78	100.01	77.42
		So	45.12	28.55		18.77	20.48	11.27	39	114.79		52.78	64.48	30.4	13.3	9.91
	HB23	Ss	29.46	7.88		60.62	105.43	10.05	12.83	12.64		139.66	160.47	7.27	10.4	8.51
		So	33.56	14.07		28.48	21.49	22.07	27.47	53.29		33.78	44.01	20.97	12.54	26.48
	HB37	Ss	33.78	29.81		34.45	92.91	12.03	16.33	19.77		115.52	119.87	15.08	25.33	13.31
		So	0.72	7.54		0.09	0	0.56	0.56	0		2.4	0.92	4.44	2.12	1.06
	HB58	Ss	0.1	0		0	0	0	0	0		0	0	0	0	0.31
		So	0	0		0	0	0	0.6	0		0	0	0	0	0
	HB63	Ss	0.44	0.98		0	0	3.78	0	0.22		0.51	0.41	0.83	0.57	1.18
		So	-	-		-	-	-	-	-		-	-	-	-	-
	HB64	Ss	0.34	0		0	0	0	0	0.96		0.55	0.9	0	0.49	0
		So	-	-		-	-	-	-	-		-	-	-	-	-
	HB65	Ss	2.68	4.78		0	1.06	1.82	1.72	2.43		3.5	1.01	4.7	2.97	2.82
		So	0.98	1.32		0.71	7.28	2.26	1.39	1.64		3.84	3.13	8.38	7.02	1.85
	HB67	Ss	0.16	0		0	0	0	0	0		0.55	0.3	0	0	0
		So	0	0		0.98	0	0	0	0		0.3	0.87	0	0.24	0.38
	HB73	Ss	1.07	3.07		1.67	0	15.86	3.99	6.88		0.64	0.67	9.41	5.65	8.41
		So	2.84	2.96		17.21	10.88	0.95	10.61	2.72		1.14	0.33	10.62	2.5	3.44
	HB95	Ss	1.13	0.09		0	0	0	0	0		0.63	0.35	0	0	0.28
		So	0	0		0	1.18	0	0	0		0	0.95	0	0	0
	HB96	Ss	11.55	31.53		12.12	9.7	23.37	35.01	29.44		22.8	14.98	42.11	39.11	49.46
		So	0	0		0	0	0	0	0		0.34	0.66	0	0	0
	HB99	Ss	8.11	14.06		2.27	0	5.84	15.23	15.3		2.17	0.45	1.32	5.69	4.81
		So	2.46	3.16		1.28	1.32	0.41	2.53	4.73		0.72	0.77	1.99	1.34	1.4
	HB100	Ss	0	24.65		0	0	15.72	0	0		0	0	0.42	0	0
		So	7.15	36.29		3.87	6.52	8.08	11.39	19.8		2.81	5.29	22.11	3.84	3.68
HD-ZIPⅢ	HB1	Ss	26.44	70.61		23.94	17.61	72.94	86.63	83.41		17.56	16.46	129.55	109.43	150.12
		So	34.42	86.58		15.46	11.54	71.09	111.68	106.04		19.99	12.07	190.7	148.8	80.01
	HB14	Ss	20.84	75.7		20.61	7.66	32.47	19.64	10.13		21.69	14.64	50.46	27.62	21.08
		So	26.5	60.86		5.9	3.18	19.07	3.99	5.2		21.82	22.88	73.57	15.15	12.07
	HB15	Ss	67.12	114.46		62.42	56.81	135.8	334.54	352.01		43.74	34	153	245.33	211.68
		So	20.97	40.2533		9	15.16	68.76	226.92	274.77		11.82	7.7	105.94	84.41	54.09
	HB42	Ss	3.44	35.87		5.46	1.98	114.6	59.15	59.5		1.03	0.32	83.71	44.52	49.09
		So	7.32	32.06		1.35	1.99	48.32	44.33	41.14		2.74	0.8	99.87	25.08	8.95
	HB47	Ss	2.93	23.1		4.9	1.57	78.8	37.49	37.67		1.54	1.89	56.97	35.22	38.45
		So	-	-		-	-	-	-	-		-	-	-	-	-
	HB48	Ss	0.25	3.1		0.61	0	12.88	8.49	5.38		0	0	8.88	3.39	2.5
		So	-	-		-	-	-	-	-		-	-	-	-	-
	HB56	Ss	9.76	10.44		8.43	9.61	6.65	4.23	2.71		22.48	18.9	3.81	2.64	4.22
		So	5.27	4.48		6.77	19.79	2.61	3.42	2.49		6.37	6.41	3.3	3.43	10.48
HD-ZIPⅣ	HB4	Ss	0.79	0.26		2.02	0	0	0.32	0		0.08	0.67	0.11	0.11	0
		So	0	0		0	0	0	0	0		0	0	0	0.22	0
	HB11	Ss	3.32	29.38		8.77	4.81	13.04	0.19	0.8		16.89	13.13	8.06	2.3	0.62
		So	3.72	5.35		3.88	2.81	1.82	0.52	0		12.89	12.04	4.95	1.41	0.86
	HB34	Ss	23.18	44.17		26.15	52.18	6.66	3.76	1.44		51.81	50.83	4.72	3.58	1.72
		So	13.55	28.14		23.96	11.5	5.6	1.63	3.56		34.8	28.24	7.22	5.35	4.67
	HB41	Ss	45.26	6.1		24.63	5.78	6.31	25.11	44.77		5.56	6.56	8.9	11.63	16.29
		So	0.52	2.47		0	0	0.3	0.13	0.19		0.62	0.74	2.49	0.75	0.9
	HB45	Ss	0.38	2.41		0	0	1.51	0	0		0	0	0.97	0.21	0.07
		So	-	-		-	-	-	-	-		-	-	-	-	-
	HB46	Ss	0.17	1.79		0	0	0	0.13	0		0	0	0.72	0.1	0
		So	-	-		-	-	-	-	-		-	-	-	-	-
	HB49	Ss	0.09	3.1		0	0	0.37	0.4	0.23		0.08	0.17	0.3	0.31	0.13
		So	0.09	0.25		0	0	1.97	0	0		0	0	0.57	0.12	0
	HB53	Ss	13.5	0.5		0.8	2.61	0	0	0		0.82	1.14	0	0	0
		So	3.91	0.03		1.58	2.9	0	0	0		0.53	0.93	0	0	0
	HB59	Ss	15.35	51.55		9.4	9.7	5.92	1.07	0.46		15.96	14.67	5.24	1.52	0.6
		So	16.1	28.09		17.32	8.27	3.99	0.98	0.85		44.19	29.53	4.89	1.04	1.92
	HB60	Ss	2.45	20.97		5.85	7.89	2.54	0.28	0		6.14	8.18	1.66	0.16	0.18
		So	0.38	9.78		0.56	3.68	0.74	0	0.2		1.62	1.08	2.73	0.19	0.13
	HB72	Ss	28.05	24.93		24.42	22.04	15.63	11.71	8.76		25.93	27.12	8.27	11.58	10.15
		So	43.92	45.05		9.88	19.28	0.75	2.45	2.32		21.44	18.14	4.28	1.55	0.86
	HB76	Ss	0.79	0.84		3.36	0.55	0	0.89	0.34		1.07	0.45	0.29	0.1	0.29
		So	0.21	0.23		0	0	0	0	0		0.68	0.22	0	0	0
	HB80	Ss	22.94	14.86		4.53	17.88	2.07	2.72	1.94		31.97	30.97	1.71	1.89	0.84
		So	38.18	14.07		34.01	9.73	0.25	0.14	3.35		45.95	44.32	1.45	3.4	2.57
	HB83	Ss	6.27	12.56		6.81	14.24	3.19	0.35	0.59		18.3	20.85	2.67	1.59	0.41
		So	4.03	6.8		3.76	5.75	0.67	0.22	0.44		15.38	19.76	1.99	0.55	1.31
DDT	HB31	Ss	1.89	6.88		2.02	3.76	7.75	12.34	13.52		15.98	17.65	12	13.39	16.35
		So	2.36	8.98		2.94	3.29	3.79	16.67	20.87		26.25	21.87	26.53	37.55	43.29
	HB54	Ss	27.3	36		32.63	33.01	21.27	33.43	35.54		29.97	24.55	34.46	25.46	31.94
		So	23.1	36.76		27.81	16.79	23.23	31.52	30.88		41.39	34.8	40.97	40.53	54.43
NDX	HB84	Ss	34.08	48.81		12.68	19.57	24.05	20.37	21.96		29.23	29.34	22.34	23.1	29.93
		So	-	-		-	-	-	-	-		-	-	-	-	-
	HB86	Ss	9.87	14.39		4.58	5.33	2.58	7.01	7.9		7.49	7.21	10.99	8.69	7.96
		So	24.7	43.79		13.7	11.51	15.13	17.06	16.21		24.2	22.42	32.31	30.82	25.55
PHD	HB68	Ss	30.03	37.18		67.96	38.4	55.98	62.5	57.33		48.96	34.56	58.9	48.91	43.52
		So	20.89	37.35		30.03	12.93	34.02	30.75	32.48		30.3	27.33	42.95	40.69	50.09
	HB88	Ss	9.93	12.6		27.9	16.65	10.74	9.31	6.2		16.28	16.36	9.72	6.7	7.06
		So	31	49.3		69.09	24.94	52.22	49.72	43.06		60.52	55.11	73.57	65.44	64.53
	HB92	Ss	11.75	17.88		33.92	30.18	12.46	13.31	10.86		21.31	16.66	11.91	10.44	9.45
		So	-	-		-	-	-	-	-		-	-	-	-	-
PINTOX	HB102	Ss	15.86	27.6		27.03	28.74	6.77	18.5	25.06		92.67	104.18	16.83	29.73	33.07
		So	17.16	26.48		24.93	58.96	6.89	24.06	26.99		106.57	88.52	18.62	23.76	36.37
PLINC	HB19	Ss	0	0.18		0	0	2.82	0.79	0		0	0	1.04	0	0
		So	0.09	0.14		0	0	12.69	0.56	0		0.31	0.34	0.58	0	0
	HB35	Ss	1.67	3.11		1.11	4.1	1.19	0.65	0		0.9	0.28	0.41	0	0
		So	1.61	1.82		1.73	3.17	3.96	1.58	0		1.86	0.56	18.66	9.3	6.41
	HB38	Ss	31.22	8.79		26.29	37.04	2.87	9.78	3.63		20.98	15.15	2.83	2.33	1.61
		So	27.77	3.28		55.94	84.73	2.56	1.47	3.15		36.87	46.85	10.06	1.31	6.99
	HB74	Ss	0	3.06		0	0	0	0	0		0	0	0.12	0	0
		So	0.03	0.78		0	0	0	0	0		0	0	0	0.12	0
	HB77	Ss	0	0.75		2.1	0	1.91	0.61	0		0.85	0.7	5.48	1.7	0.19
		So	1.78	0.41		7.58	11.01	4.52	0.33	0.57		6.67	5.45	4.91	4.21	4.61
	HB81	Ss	0	0.85		0	0	4.63	0	0.68		0	0	0.35	0.37	0
		So	0	0		0	0	0	0	0		0	0	0.55	0	0
	HB87	Ss	3.25	0.62		3.42	0.62	5.34	0.28	0.76		2.19	4.95	5.86	3.9	0.32
		So	-	-		-	-	-	-	-		-	-	-	-	-
	HB91	Ss	25.99	6.1		4.15	2.76	0.58	0	0		10.5	7.92	0.34	0	0
		So	31.74	2.71		3.57	13.45	1.02	0	0		13.07	6.86	2.57	0	0
	HB93	Ss	5.1	1.55		9.69	12.11	17.36	2.96	2.56		3.8	10.76	12.55	11.83	4.67
		So	8.22	0.63		20.35	25.79	24.2	7.62	6.47		8.38	8.82	20.6	7.49	11.97
SAWADEE	HB40	Ss	27.01	30.43		20.18	24.05	19.96	30.38	38.29		26.55	22	24.08	26.34	18.43
		So	-	-		-	-	-	-	-		-	-	-	-	-
	HB44	Ss	7.61	7.1		11.21	5.81	6.31	3.23	10.96		11.57	13.72	2.41	6.45	5.66
		So	36.2	34.35		41.82	27.63	26.88	30.91	34.29		33.86	33.95	39.59	35.17	35.09
	HB78	Ss	0	0		0	0	0	0	0		0	0	0	0	0
		So	0	0		0	0	0	0	0		0	0	0	0	0
WOX	HB9	Ss	0.14	0.11		0	0	0	5.42	0		0	0	3.5	2.03	0
		So	1.59	0.81		0	0	7.83	13.25	25.36		1.15	0	10.85	11.34	10.75
	HB30	Ss	0.07	0		0	0	0	5.21	0		0	0.25	0.85	2.81	0
		So	-	-		-	-	-	-	-		-	-	-	-	-
	HB50	Ss	0	1.15		0	0	1.84	0	0		0	0	0.31	0	0
		So	0	4		0	0	0	0	0		0	0	1	0	0
	HB52	Ss	16.35	20.83		39.17	28.48	30.15	56.24	56.07		5.49	10.13	43.42	31.77	26.92
		So	10.12	19.81		28.35	10.65	32.79	25.62	11.3		8.73	6.26	71.07	24.86	13.57
	HB55	Ss	0	0.03		0	0	0	0	0		0	0	0	0	0
		So	0.46	0.84		0	0	0	0	0.56		0.09	0	0.7	0	0
	HB57	Ss	0	0		0	0	0	0	0		0	0	0	0.36	0.67
		So	0	0		0	0	0	0	0		0	0	0	0	0
	HB70	Ss	0	0		0	0	0	0	0		0	0	0	0	0
		So	0	0		0	0	0	0	0		0	0	0	0	0
	HB71	Ss	0	3.33		0	0	15.63	0	0		0	0	1.59	0	0.83
		So	0	0.16		0	0	0	0	0		0	0	4.04	0	0
	HB79	Ss	0	0		0	0	1.26	0	0		0	0	0	0	0
		So	0	0		0	0	0	0	0		0	0	0	0	0
	HB82	Ss	0	0		0	0	0	0	0		0	0	0	0	0
		So	0	0		0	0	2.34	0	0		0.28	0.45	0.46	0	0

## Sheet: gradient developmental leaves
Supplementary Table S6 Expression profiling of Saccharum HB genes in different tissues at different developmental stages, gradient developmental leaves, and circadian rhythms
			Basal zone			Translational zone			Maturing zone				Mature zone
			1	2	3	4	5	6	7	8	9	10	11	12	13	14	15
BEL	HB3	Ss	0.64	9.37	51.87	129.57	174.39	192.12	193.79	169.17	156.53	147.03	133.06	123.72	116.51	120.39	116.07
		So	0.26	1.04	16.28	71.86	161.57	186.92	234.43	197.44	176.35	184.69	162.41	161.22	136.78	128.78	112.21
	HB5	Ss	14.12	49.14	126.16	137.25	85.13	66.6	49.61	32.36	18.34	14.31	11.18	10.4	9.86	9.99	13.5
		So	31.45	65.9	210.35	232.16	159.56	81.17	44.38	31.5	25.98	24.83	19.97	17.75	17.12	18.12	22.16
	HB18	Ss	30.5	99.52	173.86	170.07	134.44	117.18	123.34	127.22	115.94	118.82	108.2	95.69	92.85	90.54	89.8
		So	15.53	50.72	148.88	221.41	246.56	225.43	304.33	308.24	265.19	255.27	211.34	202.48	196.84	181.5	150.95
	HB24	Ss	0.08	1.52	9.08	23.27	32.6	35.29	33.24	24.53	22.58	16.8	16.46	15.63	14.29	15.51	13.58
		So	0.13	1.93	19.05	57.23	71	53.76	36.59	24.94	23.14	23.26	19.85	19.74	19.51	17.82	19.12
	HB26	Ss	10.03	8.15	2.94	0.71	0.28	0.09	0.15	0.24	0.33	0.15	0.05	0.13	0.05	0.1	0.08
		So	5.12	7.96	12.6	10.53	5.86	4.01	4.66	5.28	7.85	7.31	7.92	7.13	7.18	7.7	9.16
	HB27	Ss	16.69	47.44	78.46	83.91	56.9	46.23	45.21	45.47	56.68	60.82	62.45	71.9	77.03	74.67	86.03
		So	18.44	44.34	110.88	142.34	100.32	67.97	68.04	79.54	91.84	98.88	95.55	85.63	86.59	91.68	104.32
	HB43	Ss	30.97	74.1	120.23	103.54	71.17	55	50.95	44.82	40.04	43.61	45.41	50.07	59.87	63.56	89
		So	44.91	112.54	231.34	229.67	166.28	112.02	88.48	83.37	92.58	93.53	92.85	89.01	87.89	91.5	114.58
	HB51	Ss	21.1	24.66	29.68	26.45	20.69	16.14	15.05	11.49	9.24	7.51	6.6	7	6.74	6.71	8.41
		So	3.29	6.67	8.95	8.07	6.88	5.96	5.18	3.58	3.09	2.98	2.85	2.12	2.87	3	2.7
	HB66	Ss	4.06	1.77	0.97	0.94	1.14	1.11	0.96	0.61	0.3	0.16	0.23	0.13	0.1	0.18	0.29
		So	7.42	2.52	0.11	0.22	0.5	1.08	1.16	0.89	0.87	1.04	1.6	1.36	1.61	1.54	1.53
	HB75	Ss	32.92	87.54	169.71	170.45	112.6	85.18	71.17	57.67	57.95	62.24	64.94	67.72	75.1	82.76	104.93
		So	21.36	56.6	126.71	138.75	145.62	106.22	105.26	103.9	117.3	154.17	164.92	171.91	178.26	162.96	146.26
	HB89	Ss	18.44	21.14	21.65	24.14	22.93	24.02	21.4	16.93	12.41	10.84	9.92	8.96	8.43	7.93	6.98
		So	36.95	31.54	20.71	31.9	30.09	29.97	26.86	24.23	17.64	16.24	18.01	10.16	10.07	9.77	9.76
	HB98	Ss	12.49	6.83	5.08	4.15	2.32	1.49	0.82	0.22	0.04	0.01	0	0.02	0	0	0
		So	6.06	3.08	4.15	6.18	5.2	2.43	0.8	0.89	0.25	0.05	0.15	0.04	0	0	0
	HB103	Ss	0.27	1.76	7.05	16.75	27.53	37.19	40.67	39.33	36.57	32.83	24.49	31.31	28.65	30.43	37.66
		So	0.35	1.1	3.4	10.14	16.9	14.41	14.32	12.37	11.78	10.64	8.61	7.39	9.05	7.09	9.95
KNOX	HB2	Ss	29.59	178.55	500.85	608.3	523.28	406.5	249.49	106.25	44.34	18.73	16.43	13.37	10.3	10.27	7.52
		So	6.31	68.08	386.9	628.8	645.29	325.44	99.07	34.2	19.18	11.2	7.8	6.47	6.49	6.29	5.88
	HB16	Ss	4.51	10.91	15.75	10.2	4.79	2.91	2.29	2.6	2.14	2.36	1.8	1.79	1.97	3.18	3.06
		So	9.51	17.35	24.8	22.72	13.47	6.48	4.8	6.2	4.35	3.09	3.09	2.68	4.44	3.3	3.92
	HB17	Ss	0.4	3.11	16.15	28.4	45.64	31.09	7.26	0.57	0.29	0.11	0	0.01	0.02	0.01	0.01
		So	3.51	6.78	31.34	96.2	171.72	240.56	284.03	315.91	309.06	275.18	212.22	195.71	229.48	173.82	150.13
	HB20	Ss	0	0	0	0	0	0	0	0	0	0	0	0	0	0	0
		So	0	0	0	0	0	0	0	0.05	0	0	0	0	0	0	0
	HB21	Ss	0.62	0.38	0.41	0.34	0.26	0.21	0.22	0.23	0.23	0.16	0.14	0.13	0.15	0.22	0.3
		So	0	0	0	0	0	0	0	0.05	0	0	0	0	0	0	0
	HB22	Ss	0.45	1.2	2.19	2.68	2.34	1.31	1.29	0.83	0.87	0.41	0.33	0.46	0.3	0.49	0.63
		So	1.37	1.04	0.86	2.29	0.92	0.33	0.74	0.06	0	0	0	0.12	0.11	0.05	0.19
	HB25	Ss	0	0	0	0	0	0	0	0	0	0	0	0	0	0	0
		So	-	-	-	-	-	-	-	-	-	-	-	-	-	-	-
	HB90	Ss	0	0.05	0.02	0.03	0.02	0	0.01	0.01	0	0.01	0.02	0.04	0	0	0.07
		So	0.58	0.26	0.2	0	0	0.16	0.34	0.19	0.1	0	0	0	0.16	0.09	0.74
	HB97	Ss	94.64	134.64	167.68	182.33	181.76	166.74	165.09	173.82	178.89	165.5	167.5	167.49	167.13	161.11	168.2
		So	139.81	169.45	203.62	242.59	235.47	241.51	215.29	220.03	223.97	220.18	235.05	239.81	238.82	238.22	248.89
	HB101	Ss	45.31	55.87	67.09	85.84	100.78	99.12	103.49	104.96	99.5	83.43	81	74.06	74.56	77.6	83.84
		So	35.25	46.11	64.4	75.14	54.18	59.4	48.54	49.59	63.61	51	45.96	45.84	54.68	49.26	42.82
	HB104	Ss	5.19	6.24	6.99	9.89	6.76	8.52	8.04	8.5	8.99	10.93	9.01	9.64	9.36	11.07	11.18
		So	11.95	9.71	15.97	20.58	17.5	20.3	16.26	21.15	17.7	18.37	19.24	20.41	17.76	17.41	22.1
HD-ZIPⅠ	HB6	Ss	8.22	12.38	10.48	3.51	1.09	0.62	0.58	0.27	0.61	0.63	0.37	0.29	0.13	0.08	0.13
		So	21.84	45.51	45.8	18.48	5.74	5.56	4.71	3.98	3.91	2.48	1.02	1.45	1.69	0.69	0.85
	HB7	Ss	22.77	43.36	75.46	76.1	72.32	70.64	63.12	47.55	33.82	23.11	20.08	14.58	14.68	17.43	18.58
		So	14.23	27.51	47.55	40.09	49.39	61.64	50.23	29.6	23.8	18.45	19.16	15.86	21.3	24.16	36.53
	HB8	Ss	22.22	25.29	20.97	14.01	8.76	4.54	2.65	1.06	0.5	0.23	0.3	0.08	0.04	0	0.13
		So	12.51	23.94	15.99	4.95	0.96	0.17	0	0	0	0	0	0	0.08	0	0.1
	HB13	Ss	45.34	78.87	59.04	16.68	4.69	2.84	1.74	1.68	2.83	3.49	2.6	1.89	1.14	0.91	0.92
		So-a	14.11	24.85	19.18	10.21	4.17	2.3	2.55	2.12	2.11	2.37	1.08	1.35	1.09	1.16	0.98
		So-b	8.27	14.98	16.05	3.92	1.91	0.47	0.59	0.86	0.59	0.62	0.07	0.29	0.43	0.3	0
	HB28	Ss	2.03	8.21	5.99	2.28	1.13	1.04	0.86	1.06	1.9	2.42	3	4.28	5.35	6.02	9.19
		So	2.69	8.34	4.92	2.5	1.18	0.71	0.53	0.55	0.64	0.78	0.4	0.21	1.46	0.82	3.89
	HB29	Ss	0.81	2.55	2.46	0.65	0.26	0.21	0.27	0.37	0.62	1.08	1.22	1.77	1.59	2.27	4.37
		So	-	-	-	-	-	-	-	-	-	-	-	-	-	-	-
	HB32	Ss	0.13	0.16	0.16	0.06	0.09	0	0.03	0	0.02	0.02	0.04	0	0.03	0	0
		So	1.44	2.26	0.13	0.21	0.68	1.11	3.07	2.47	2.46	4.3	4.12	3.29	2.39	2.09	0.91
	HB33	Ss	3.03	9.1	14.93	13.2	10.24	9.45	9.25	9.1	7.71	8.5	8.37	9.94	7.55	8.48	9.44
		So	14.55	14.7	14.67	16.32	15.06	16.91	17.65	20.6	16.17	20.5	23.48	23.51	23.86	25.64	46.31
	HB36	Ss	167.5	142.79	83.6	48.8	34.42	35.38	38.53	47.11	52.68	54.65	51.55	50.52	52.24	55.28	70.06
		So	78.38	84.61	74.38	32.19	21.6	21.79	32.17	42.89	31.23	32.85	27.02	24.53	27.04	24.29	35.94
	HB39	Ss	8.02	13.36	9.68	3.27	3.4	5.46	7.68	9.86	19.88	23.67	30.66	36.54	36.16	40.95	40.63
		So	0.97	3.52	1.47	1.45	1.87	3.52	6.8	11.8	13	13.99	15.27	15.29	14.43	15.98	14.06
	HB61	Ss	113.72	174.94	113.76	48.31	39.63	49.73	71.51	91.65	109.44	131.14	116.78	133.38	125.32	135.54	154.74
		So	140.53	201.94	176.11	109.47	104.91	117.99	187.58	238.88	244.06	290.72	292.44	267.46	246.38	233.8	208.05
	HB62	Ss	6.21	27.89	113.67	233.75	271.85	248.2	183.9	129.79	37.01	43.39	37.01	53.79	65.18	63.4	92.87
		So	6.89	15.04	15.92	15.72	29.16	61.68	93.26	102.86	261.34	160.97	336.94	331.64	311.23	355.74	617.52
	HB69	Ss	0	0.37	2.55	7.38	9.91	9.45	6.11	3.51	0.34	0.28	0.62	0.22	0.78	0.6	1.37
		So	-	-	-	-	-	-	-	-	-	-	-	-	-	-	-
	HB85	Ss	45.51	64.82	82.1	89.8	78.46	77.24	82.65	90.45	107.52	121.08	106.46	110.49	103.35	111.01	134.17
		So	44.52	60.9	62.41	74.99	73.71	77.79	101.45	124.46	136.4	150.6	145.36	145.35	146.6	151.29	168.08
	HB94	Ss	0	0	0	0	0	0	0	0	0	0	0	0	0	0	0
		So	26.99	27.54	18.7	18.23	23.32	31.99	43.64	49.96	40.27	41.23	37.55	38.51	34.42	30.78	35.06
HD-ZIPⅡ	HB10	Ss	3.38	3.15	2.89	1.82	1.25	1.12	1.14	1.31	1.37	1.41	1.25	1.17	1.85	2.05	2.81
		So	5.34	1.23	0.12	0.18	0.33	0.59	0.71	0.55	0.6	1.13	1.38	1.99	3.37	2.58	2.92
	HB12	Ss	1.85	2.58	6.53	9.98	11.87	9.85	9.38	8.93	10.91	15.55	20.99	30.28	36.19	35.7	50.33
		So	2.03	3.76	8.37	14.85	19.45	13.25	10.01	12.52	22.43	22.99	42.23	43.81	45.56	50.67	58.77
	HB23	Ss	47.82	40.6	33.87	35.7	40.25	37.47	38.52	40.76	45.37	58.14	62.15	65.91	75.26	71.41	58.81
		So	26.8	27.75	32.12	24.51	25.54	22.85	24.86	33.04	42.52	38.79	46.57	45.02	40.84	39.53	39.64
	HB37	Ss	29.76	17.1	24.33	37.04	30.11	33.04	34.37	31.38	33.81	44.07	37.74	43.83	47.62	52.31	62.04
		So	1.24	0.37	0.85	3.5	5.92	2.92	0.85	0.53	0.24	0.35	0.25	0.23	0.31	0.04	0
	HB58	Ss	0.74	0.12	0.02	0.04	0.03	0.03	0.03	0.07	0.15	0.04	0.04	0.06	0.02	0.02	0.04
		So	0.71	0	0	0	0	0	0	0	0	0	0	0	0	0	0.12
	HB63	Ss	0.72	0.31	0.15	0.39	0.34	0.4	0.27	0.36	0.29	0.2	0.03	0.3	0.1	0.04	0.1
		So	-	-	-	-	-	-	-	-	-	-	-	-	-	-	-
	HB64	Ss	0.28	0.33	0.39	0.22	0.02	0.06	0.02	0.14	0.11	0.38	0.33	0.45	0.76	0.97	1.16
		So	-	-	-	-	-	-	-	-	-	-	-	-	-	-	-
	HB65	Ss	2.55	1.63	1.13	1.35	1.73	1.31	1.5	1.11	1.09	1.07	0.84	0.67	0.7	0.77	0.88
		So	3	0.54	0.41	0.37	0.81	0.72	0.54	0.35	0.66	0.59	0.69	0.35	0.73	0.85	0.7
	HB67	Ss	0.18	0.26	0.23	0.15	0.05	0	0.02	0	0	0.02	0.05	0.07	0.02	0.11	0.09
		So	0.62	0.51	0.42	0	0.09	0	0	0.31	0.22	0.35	0.16	0.52	0.08	0.35	0.09
	HB73	Ss	6.49	4.45	6.65	7.91	3.93	3.49	4.71	5.66	3.83	5.79	2.55	1.37	0.98	0.64	1.01
		So	2.01	0.78	2.23	3.65	2.97	4.61	7.9	5.04	7.9	4.7	5.52	5.82	9.95	5.29	1.21
	HB95	Ss	0	0	0	0.05	0.04	0.1	0.14	0.14	0.33	0.35	0.34	0.47	0.48	0.43	0.2
		So	0	0	0	0	0	0	0	0	0	0	0	0	0	0	0
	HB96	Ss	38.7	23.22	12.78	11.78	13.41	14.71	14.46	11.29	6.5	5.11	4.5	4.29	5.51	5.86	8.32
		So	0	0	0	0	0	0	0	0	0	0	0	0	0	0	0
	HB99	Ss	13.33	26.88	23.29	7.45	3.1	2.85	2.17	2.24	1.48	1.88	1.09	1.05	0.67	0.92	2.07
		So	2.34	5.94	5.4	2.54	0.97	0.92	0.9	0.51	0.36	1.16	0.36	0.4	0.39	0.23	0.29
	HB100	Ss	13.63	33.52	24.27	1.82	0.19	0.03	0	0.03	0.02	0.16	0.04	0	0	0	0
		So	17.77	44.9	45.44	10.76	7.34	6.67	9.52	9.54	10.1	8.1	7.9	8.59	8.79	7.07	5.75
HD-ZIPⅢ	HB1	Ss	46.97	39.71	27.19	22.8	20.51	16.34	16.24	14.09	12.8	11.53	10.08	9.64	8.6	8.18	7.71
		So	55.82	48.32	31.62	31.28	23.54	22.98	19.5	18.45	17.84	16.31	16.6	13.75	14.56	11.97	11.79
	HB14	Ss	33.95	44.24	52.44	50.03	32.79	29.45	32.37	32.37	31.07	26.61	23.39	22.33	21.88	20.54	16.38
		So	30.63	39.55	35.08	45.22	32.6	34.05	37.46	32.47	24.89	23.04	17.02	11.58	18.33	14.43	16.14
	HB15	Ss	109.86	77.91	35.46	32.44	38.94	45.91	45.67	36.21	40.25	32.53	32.75	27.86	27.23	26.21	22.35
		So	85.3667	59.8433	25.3633	17.73	16.1067	21.9633	23.9067	24.04	21.64	22.6133	24.64	23.6767	21.7233	23.48	19.8067
	HB42	Ss	20.02	12.58	6.14	4.18	3.88	3.49	2.36	1.47	0.96	0.57	0.35	0.31	0.28	0.25	0.13
		So	30.75	17.19	12.83	7.71	5.2	3.12	2.58	1.27	0.9	0.4	0.57	0.2	0.24	0.24	0.36
	HB47	Ss	17.22	11.89	5.32	4.24	3.61	2.43	2.37	1.48	0.77	0.46	0.28	0.22	0.21	0.23	0.33
		So	-	-	-	-	-	-	-	-	-	-	-	-	-	-	-
	HB48	Ss	1.98	1.73	0.95	0.74	0.24	0.16	0.26	0.35	0.14	0.06	0	0	0	0.02	0.02
		So	-	-	-	-	-	-	-	-	-	-	-	-	-	-	-
	HB56	Ss	11.26	12.41	9.62	7.71	7.57	7.29	6.44	4.9	3.09	2.49	2.28	2.69	2.25	2.3	1.93
		So	5.61	5.8	4.22	3.83	4.66	3.2	2.57	2.89	3.19	2.9	2.11	2.16	1.49	1.96	1.1
HD-ZIPⅣ	HB4	Ss	0.27	0.5	1	1.11	1.36	1.35	1	0.59	0.43	0.39	0.32	0.33	0.32	0.37	0.27
		So	0	0	0	0	0	0	0	0	0	0	0	0	0	0	0
	HB11	Ss	68.1	16.8	3.91	2.92	4.04	4.55	5.02	4.92	4.11	4.52	4.18	3.8	3.88	3.73	3.14
		So	62.36	15.06	2.31	2.14	4.69	3.89	5.23	4.11	3.91	3.37	2.4	2.64	2.29	1.98	2.79
	HB34	Ss	73.99	87.1	81.92	47	24.94	20.41	22.21	22.18	25.93	27.81	27.27	26.33	25.91	25.86	24.56
		So	44.08	65.76	77.87	40.57	25.53	22.07	28.18	24.68	22.35	20.5	19.08	21.05	19.1	21.37	17.61
	HB41	Ss	1.71	1.4	1.36	1.63	2.44	3.32	4.76	4.38	7.12	6.41	5.63	5.22	4.36	3.46	2.61
		So	0.85	3.18	3.65	1.15	0.81	0.94	0.91	0.87	0.73	0.66	0.63	0.56	0.54	1.25	1.16
	HB45	Ss	0.38	1.32	3.41	2.03	0.51	0.35	0.18	0.2	0.17	0.2	0.2	0.11	0.17	0.08	0.04
		So	-	-	-	-	-	-	-	-	-	-	-	-	-	-	-
	HB46	Ss	0.42	1.5	3.57	1.93	0.61	0.23	0.24	0.22	0.22	0.23	0.19	0.12	0.08	0.06	0.06
		So	-	-	-	-	-	-	-	-	-	-	-	-	-	-	-
	HB49	Ss	0.35	1.2	3.22	1.97	0.81	0.27	0.26	0.27	0.29	0.26	0.25	0.2	0.13	0.07	0.06
		So	0.34	0.18	0.32	0.05	0	0	0	0	0	0	0	0	0	0	0
	HB53	Ss	0.38	1.04	0.92	0.47	0.18	0.54	1.09	2.37	4.52	7.04	8.8	9.97	11.26	11.95	10.81
		So	0	0.03	0	0.02	0.06	0.76	1.39	2.22	1.98	2.21	2	2.01	2.8	1.71	1.37
	HB59	Ss	52.68	58.53	42.91	16.43	7.03	8	10.63	13.37	21.41	25.09	25.43	26.62	28.65	27.61	26.25
		So	47.95	55.05	39.93	15.49	8.51	9.57	16.63	23.52	28.2	42.46	32.63	33.09	32.79	30.71	28.82
	HB60	Ss	35.34	28.73	24.46	9.83	1.93	1.15	0.92	1.18	1.3	1.39	1.16	0.52	0.46	0.31	0.24
		So	52.13	33.89	29.69	8.42	2.41	1.49	1.27	1.57	1.16	0.91	0.69	0.84	0.7	0.69	1.21
	HB72	Ss	19.15	17.43	14.8	13.43	13.92	14.11	15.08	15.13	15.58	15.22	13.49	14.89	15.63	15.14	17.12
		So	76.14	61.72	29.02	28.83	24.46	16.6	13.18	9	8.86	8.54	7.03	5.75	6.01	5.8	8.21
	HB76	Ss	0.42	0.94	1.24	2.13	1.82	1.97	1.21	1.12	0.72	0.41	0.51	0.41	0.56	0.52	0.38
		So	0.04	0	0.13	0.06	0.06	0.08	0.03	0.03	0	0.03	0.12	0.06	0.14	0.08	0.82
	HB80	Ss	22.39	17.31	13.51	11.43	10.47	11.82	12.3	12.37	16.29	17.15	16.13	17.18	17.67	18.56	21.48
		So	42.14	24.35	12.32	13.89	13.71	11.54	17.53	16.73	20.12	21.68	21.44	23.96	28.67	25.4	28.16
	HB83	Ss	24.26	16.15	11.04	6.6	3.46	2.5	2.82	3.01	3.9	4.46	4.3	4.9	5.23	4.82	6.22
		So	32.38	24.09	12.57	5.29	1.9	1.62	2.11	2.55	2.82	3.57	2.45	3.34	3	3.08	3.29
DDT	HB31	Ss	7.79	1.82	0.46	0.76	1.05	0.91	0.72	0.31	0.34	0.19	0.18	0.24	0.35	0.46	0.89
		So	11.33	4.07	2.16	3.28	2.03	1.63	0.76	0.77	0.48	0.25	0.9	0.31	0.31	0.41	0.93
	HB54	Ss	23.66	21.92	20.92	22.1	24.22	19.28	19.47	17.25	20.08	14.71	15.14	14.98	16.94	15.04	17.93
		So	25.43	27.96	29.59	32.13	23.04	18.01	16	15.27	16.64	16.3	17.01	18.75	17.06	19.65	21.87
NDX	HB84	Ss	27.03	27.02	25.71	24.73	23.9	22.07	22.51	17.67	16.04	16.58	13.56	16.46	18.02	16.93	18.69
		So	-	-	-	-	-	-	-	-	-	-	-	-	-	-	-
	HB86	Ss	8.58	9.82	9.23	9.06	8.63	7.16	6.77	6.9	6.07	5.24	5.25	5.73	5.71	5.48	6.39
		So	26.84	23.88	27.89	30.49	23.5	17.34	13.58	14.43	15.2	15.61	14.56	15.75	13.36	16.2	16.67
PHD	HB68	Ss	67.44	52.24	40.94	36.14	38.51	32.51	29.89	25.82	30.3	24.46	27.6	21.14	22.69	21.24	18.36
		So	97.39	110.06	82.21	44.51	34.16	28.78	22.58	26.52	30.88	29.96	38.74	38.41	38.24	37.41	32.29
	HB88	Ss	17.17	9.82	8.65	9.54	11.54	10.79	10.19	8.12	8.54	6.98	7.44	7.02	7.13	5.87	5.93
		So	67.9	53.26	36.06	28.1	24.85	24.2	17.81	19.03	22.14	21.33	26.67	29.29	29.2	29.84	32.79
	HB92	Ss	19.5	11.61	10.37	11.53	13.37	12.47	11.86	10.07	11.47	8.17	9.94	7.83	8.79	8.05	6.98
		So	-	-	-	-	-	-	-	-	-	-	-	-	-	-	-
PINTOX	HB102	Ss	11.01	20.7	32.18	41.28	47.04	47.55	41.61	35.94	21.27	12.01	8.95	6.55	6.96	7.41	9.64
		So	13.22	22.13	41.68	37.77	22.44	13.75	6.9	4.31	3.45	2.46	2.66	2.3	3	4.18	6.73
PLINC	HB19	Ss	0.95	0.43	0.17	0.14	0.13	0.15	0.02	0.07	0.07	0.05	0.03	0	0	0	0.02
		So	3.88	4.35	1.34	0.24	0.08	0.26	0.08	0	0.09	0	0	0	0	0	0.1
	HB35	Ss	3.88	1.04	0.65	1.88	3.11	5.56	7.23	7.52	6.88	6.82	3.71	4.02	2.27	1.7	2.41
		So	14.06	8.87	6.51	5.12	15.48	19.91	14.56	11.57	7.4	1.42	0.4	1.07	0.44	0.44	4.93
	HB38	Ss	28.96	12.2	3.66	4.36	6.15	10.2	18.18	25.01	39.63	57.01	56.15	63.9	63.55	73.66	84.41
		So	40.82	14.81	4.85	7.73	16.8	29.76	61.45	71.11	71.34	86.55	72.02	59.31	65.98	54.16	47.18
	HB74	Ss	6.98	4.01	3.83	3.48	1.83	0.76	0.46	0.32	0.42	0.31	0.09	0.08	0.04	0.02	0.02
		So	4.16	1.51	2.18	2.39	1.67	0.41	0.79	0.81	0.45	0.73	0.61	0.6	0.48	0.64	0.18
	HB77	Ss	6.33	2.52	2.38	4.25	5.48	5.47	5.28	4.41	2.58	1.65	1.12	0.46	0.51	0.29	0.17
		So	9.93	4.33	1.03	2.23	6.1	7.63	11.5	7	7.12	7.43	10.25	10.59	9.57	6.34	6.15
	HB81	Ss	8.52	3.39	0.82	0.56	0.67	0.15	0.03	0.05	0.01	0.02	0	0.19	0	0	0.16
		So	1.8	0.44	0	0	0	0	0	0	0	0.05	0	0.05	0	0	0
	HB87	Ss	2.95	0.39	0.08	0.24	0.61	0.79	1.79	2.7	4.78	7.26	7.1	7.53	7.36	8.96	9.09
		So	-	-	-	-	-	-	-	-	-	-	-	-	-	-	-
	HB91	Ss	4.6	2.81	2.77	5.29	11.35	26.06	35.75	40.52	36.92	40.18	28.93	29.68	24.36	24.02	24.03
		So	5.76	2.87	4.17	12.97	43.15	50.68	57.59	45.96	35.85	33.85	21.09	18.55	19.99	15.41	17.4
	HB93	Ss	4.53	0.88	0.53	0.94	1.05	2.53	3.41	4.72	10.18	14.15	14.46	14.81	15.29	14.39	17.43
		So	2.61	0.67	0.2	2.57	5.5	9.78	20.12	22.55	22.02	24.84	21.42	20.67	22.18	18.37	14.54
SAWADEE	HB40	Ss	25.83	23.09	15.32	15.06	14.38	13.19	15.1	14.47	13.49	13.93	13.81	15.32	14.63	14.64	16.92
		So	-	-	-	-	-	-	-	-	-	-	-	-	-	-	-
	HB44	Ss	8.81	5.35	3.7	2	2.31	1.71	3.68	3.85	4.66	4.81	4.6	3.76	4.7	5.19	6.04
		So	42.33	32.58	22.31	19.09	15.36	17.55	17.69	24.35	26.2	29.29	24.81	27.01	24.02	28.67	25.98
	HB78	Ss	0	0	0	0	0	0	0	0	0	0	0	0	0	0	0
		So	0	0	0	0	0	0	0	0	0	0	0	0	0	0	0
WOX	HB9	Ss	0.15	0	0	0.06	0	0	0.02	0	0	0	0	0	0.01	0.01	0.16
		So	1.03	2.41	2.26	1.67	2.6	3.31	5.11	3.62	1.73	1.11	2.1	3	1.76	1.98	3.3
	HB30	Ss	0.18	0.11	0.04	0.03	0	0	0.02	0	0	0.01	0	0	0	0	0.04
		So	-	-	-	-	-	-	-	-	-	-	-	-	-	-	-
	HB50	Ss	2.07	0.95	0.55	0.23	0	0	0	0	0	0	0	0	0	0	0
		So	3.11	2.13	1.74	1.07	0.09	0	0.11	0	0.11	0	0.1	0.11	0.17	0.25	0.53
	HB52	Ss	18.83	22.22	18.35	16.05	18	23.25	22.57	20.62	12.5	12.67	12.7	12.53	11.27	10.49	10.18
		So	16.38	19.13	21.82	12.66	13.27	17.94	18.02	19.87	28.4	21.97	38.22	41.81	50.08	45.48	45.83
	HB55	Ss	0.19	0.11	0.02	0.01	0.01	0.01	0.03	0	0	0	0	0	0	0	0
		So	5.64	8.43	6.21	6.32	7.22	4.05	2.88	1.06	0.61	0.22	0.16	0.13	0.06	0.1	0.04
	HB57	Ss	0.42	0.21	0.84	1.06	1.28	1.45	1.36	1.25	1.31	1.26	1.26	0.95	0.76	1.14	1.13
		So	1.32	0.46	0.38	0	0.1	0.44	0.15	0.22	0.05	0	0	0	0.17	0.12	0.47
	HB70	Ss	0	0	0.03	0.04	0.07	0	0	0	0.01	0	0	0	0.04	0	0
		So	0	0.08	0.15	0.05	0	0	0	0	0	0	0	0	0	0	0
	HB71	Ss	1.62	1.09	0.05	0	0	0	0	0	0	0	0	0	0	0	0
		So	0.62	0	0	0	0	0	0	0	0	0	0	0	0	0	0
	HB79	Ss	0.73	0.6	0.02	0	0	0	0	0	0	0	0	0	0	0	0
		So	0.05	0	0	0.07	0	0.08	0	0	0	0	0	0	0	0	0
	HB82	Ss	0	0.02	0	0.03	0.02	0	0.02	0	0	0.01	0	0	0.01	0	0
		So	0	0	0	0.19	0.07	0	0	0	0	0	0	0.23	0	0	0

## Sheet: circadian rhythms
Supplementary Table S6 Expression profiling of Saccharum HB genes in different tissues at different developmental stages, gradient developmental leaves, and circadian rhythms
			First Cycle													Second Cycle
			06:00	08:00	10:00	12:00	14:00	16:00	18:00	20:00	22:00	24:00	02:00	04:00		06:00	10:00	14:00	18:00	22:00	02:00	06:00
BEL	HB3	Ss	125.97	152.65	102.4	166.88	174.63	191.76	166.61	132.27	206.72	180.8	128.92	139.26		109.27	132.63	201.22	195.72	191.6	184.4	97.46
		So	114.36	106.39	105.1	174.54	160.22	181.09	172.06	168.4	151.37	171.17	171.11	205.31		133.01	125.1	160.49	136.9	157.91	127.68	117.88
	HB5	Ss	39.28	24.85	11.9	77.86	38.18	85.27	128.4	141.34	177.32	156.54	90.32	52.6		41.74	17.02	33.28	154.8	173.98	104.47	39.99
		So	70.2	73.73	38.76	34.8	48.36	58.53	61.81	64.96	65.36	72.84	87.41	107.1		79.14	62.94	28.39	52.58	75.34	107.12	72.44
	HB18	Ss	62.6	77.4	69.35	154.43	173.13	222.86	179.52	140.13	176.01	164.73	100.54	86.16		90.41	98.9	180.88	199.75	202.25	157.66	72.02
		So	160.43	163.46	132.2	173.41	196.89	237.86	238.34	206.22	179.05	212.3	219.04	244.43		175.22	145.55	205.6	182.35	185.73	180.39	156.08
	HB24	Ss	14.7	13.95	7.16	19.47	15.95	25.84	27.53	21.49	38.51	30.1	16.12	13.31		12.48	8.52	12.62	35.45	30.19	27.27	9.52
		So	58.34	57.81	52.36	96.13	88.56	111.15	116.36	104.35	94.78	91.67	94.69	102.41		67.37	61.38	88.25	101.07	86.95	84.77	60.42
	HB26	Ss	0.06	0.06	0	0	0	0	0.06	0	0.07	0.08	0	0.17		0.07	0	0	0.14	0	0.11	0.14
		So	16.35	12.58	15.4	11.93	10.88	13.24	13.69	14.74	14.68	15.22	13.34	12.19		12.06	12.44	14.2	17.55	15.11	12.69	14.65
	HB27	Ss	160.2	116.97	98.43	171.35	158.92	212.51	221.53	239.82	263.43	273.6	258.97	155.81		172.72	102.4	173.98	210.31	229.4	252.74	140.1
		So	295.29	232.47	205.82	161.99	158.72	215.63	244.19	269.51	294.84	292.07	286.75	257.34		295.63	225.81	182.6	262.71	270.28	241.08	258.34
	HB43	Ss	166.43	97.89	77.97	160.51	123.27	106.61	104.15	192.66	208.02	208.79	175.32	130.21		204.61	82.78	180.02	112.2	201.88	207.1	185.07
		So	384.57	330.84	379.85	277.21	199.73	214	205.73	254.33	283.35	252.26	284.2	229.26		261.96	278.92	287.52	251.43	274.07	272.73	316.34
	HB51	Ss	44.38	53.55	20.25	46.59	21.65	27.95	34.53	61.41	76.07	72.29	50.17	54.2		61.22	29.5	23.02	31.79	76.08	68.15	45.3
		So	9.4	7.93	8.72	6.27	3.54	4.11	6.24	7	4.33	4.67	6.2	7.71		8.36	10.62	7.1	4.04	4.78	10.04	5.62
	HB66	Ss	0.11	0.11	0.1	0.22	0.2	0.21	0.11	0.21	0.43	0.15	0.23	0.08		0.07	0.14	0.25	0.34	0.17	0.17	0.36
		So	0.14	0.12	0.04	0.18	0.18	0.2	0.1	0.09	0	0	0.04	0		0.04	0.03	0.2	0.09	0	0.09	0.03
	HB75	Ss	73.58	59.38	44.24	213.94	237.98	504.34	582.53	359.58	458.94	351.38	169.47	88.76		62.46	61.28	284.21	659.29	456.89	183.49	57.9
		So	370.62	283.28	185.13	270.49	317.64	504.01	607.43	665.72	600.79	679.71	687.18	798.95		513.25	353.76	207.59	449.67	516.73	446.9	418.77
	HB89	Ss	41.45	33.95	9.86	32.5	7.71	13.46	33.96	71.28	76.05	64.52	42.37	43.65		63.31	11.17	13.67	33.5	103.27	83.05	44.15
		So	43.93	51.68	46.06	12.81	12.77	11.96	15.57	21.1	17.88	22.42	25.83	38.6		39.43	55.84	18.9	12.74	22.44	43.73	30.84
	HB98	Ss	0	0	0	0	0	0	0.06	0	0	0	0	0		0.08	0	0	0	0	0	0
		So	0	0	0	0	0	0.09	0.06	0	0	0	0	0		0	0	0	0	0	0	0
	HB103	Ss	37.21	52.28	22.04	23.77	20.27	15.66	12.08	11.1	12.71	17.09	23.23	48.54		34.57	47.61	37.12	12.63	10.75	30.74	28.98
		So	3.14	10.88	9.82	10.69	15.38	10.45	6.76	3.15	1.78	2.42	3.34	2.84		4.4	12.3	13.62	4.79	4	3.66	4.23
KNOX	HB2	Ss	3.37	4.57	3.25	4.75	2.32	3.09	6.2	7.31	10.24	6.98	5.04	4.01		4.52	4.34	4.92	6.11	8.88	5.37	4.82
		So	6.79	7.94	5.64	8.37	8.81	8.57	8.53	6.96	7.74	6.83	9.4	9.94		8.79	9.29	5.37	8.51	8.75	8.89	6.04
	HB16	Ss	19.99	17.92	12.21	22.96	18.65	19.72	20.8	24.08	19.47	20.29	19.12	20.38		24.24	24.34	25.43	26.83	32.42	33.39	24.36
		So	13.13	9.53	20.02	20.36	23.07	20.37	22.05	20.34	21.96	13.1	14.54	14.31		14.76	8.2	19.58	24.84	16.39	11.62	10.41
	HB17	Ss	0.03	0.06	0.15	0.09	0.27	0.07	0.15	0	0.03	0.19	0	0		0.11	0.22	0.16	0.09	0	0.06	0.06
		So	107	149.25	149.07	154.75	118.16	111.96	84.43	51.01	39.57	67.15	70.5	97.42		53.31	173.67	141.6	87.92	45.64	66.15	77.49
	HB20	Ss	0	0	0	0	0.09	0	0	0	0	0	0	0		0	0	0	0	0	0	0
		So	0	0	0	0	0	0	0	0	0	0	0	0		0	0	0	0	0	0	0
	HB21	Ss	0.24	0.1	0.19	0.39	0.07	0.2	0.23	0.06	0.2	0.47	0.06	0.03		0.22	0.14	0	0.3	0.15	0	0.04
		So	0	0	0	0	0	0	0	0	0	0	0	0		0	0	0	0	0	0	0
	HB22	Ss	0.67	0.55	0.44	0.46	0.51	0	0.48	0.11	0.27	0.07	1.11	0.26		1.17	0.51	1.37	0	0.71	0.53	0.46
		So	0.35	0.3	0	0.04	0.21	0	0.03	0.4	0	0.39	0.04	0.09		0.42	0	0.35	0.28	0	0	0.03
	HB25	Ss	0	0	0	0	0	0	0	0	0	0	0	0		0	0	0	0	0	0	0
		So	-	-	-	-	-	-	-	-	-	-	-	-		-	-	-	-	-	-	-
	HB90	Ss	0.07	0	0.25	0	0.22	0.09	0.23	0.08	0	0.27	0.15	0.3		0.22	0	0.49	0	0.19	0.08	0.33
		So	0	1.15	0.47	1.77	0.36	0.44	0.19	2.17	0.58	0.7	0.55	0.39		1.08	0.57	0.11	0.23	0.34	0.65	0
	HB97	Ss	165.11	177.91	154.38	316.32	490.51	690.1	728.72	467.31	351.96	303.57	291.84	210.84		196.62	175.48	486.17	622.64	366.38	276.7	144.03
		So	460.31	324.89	262.71	322.94	486.12	846.52	878.92	881.55	930.39	896.65	821.47	737.45		744.06	371.51	416.31	688.8	632.12	600.96	607.58
	HB101	Ss	38.98	51.54	61.02	115.65	240.97	312.01	276.12	152.03	88.57	79.03	65.36	42.44		46.84	56.76	226.54	235.83	93.3	56.44	32.39
		So	117.39	72.43	61.23	88.3	178.27	337.8	320.77	298.74	321.17	324.67	270.3	247.33		288.28	129.9	133.72	245.93	252.24	211.6	123.01
	HB104	Ss	6.13	8.5	3.56	10.29	22.37	30.39	28.65	15.78	13.12	11.39	9.67	5.3		4.19	9.24	20.98	30.97	12.41	7.96	6.2
		So	29.41	14.6	14.92	21.92	27.29	57.51	63.63	60.94	60.27	55.07	50.46	45.63		50.28	24.04	32.48	44.95	37.98	40.12	39.98
HD-ZIPⅠ	HB6	Ss	0	0	0	0	0	0	0	0	0	0	0	0		0	0	0	0	0	0	0
		So	0	0	0	0.55	0.51	0.41	0.22	0.18	0	0	0	0		0	0.07	0.21	0	0	0	0
	HB7	Ss	1.34	0.55	0.23	3.2	3.14	12.4	22.79	9.81	6.64	4.94	2.16	2.07		1.16	0.94	2.24	20.15	8.96	2.6	1.26
		So	0.88	1.42	1.19	2.06	1.21	0.73	2.31	2.22	1.02	1.04	1.06	1.09		0.95	1	0.42	1.13	2.07	1.47	0.56
	HB8	Ss	1.04	1.51	0.53	2.48	2.05	3.72	2.33	2.58	4.36	4.93	5.78	0.8		0.6	0.27	0.55	1.06	2.74	2.24	0.69
		So	0	0.1	0	0	0.39	0.11	0.25	0.46	0.12	0.09	0.09	0		0	0	0	0.07	0	0.07	0.07
	HB13	Ss	0.32	0.14	0	0	0.19	0.07	0.19	0.28	0.25	0.28	0.12	0.19		0.42	0.24	0.17	0.25	0.46	0.34	0.44
		So-a	0	0.39	0	0.12	0.06	0.25	0.04	0.16	0	0	0	0		0.07	0.44	0	0.09	0.07	0	0
		So-b	0	0.33	0.11	0	0	0	0.23	0	0	0	0	0.19		0.05	0	0	0.1	0	0	0.09
	HB28	Ss	17.83	27.52	10.48	11.01	10.45	7.03	2.72	3.42	12.23	13.38	10.54	19.24		13.54	8.02	6.26	2.27	8.07	12.92	11.38
		So	1.03	2.76	9.31	7.27	4.6	1.93	1.19	0.69	0.73	0.29	0.61	0.73		0.59	2.57	6.07	0.73	0.99	1.24	1.02
	HB29	Ss	6.79	13.63	4.86	5.82	2.81	2.98	0.87	0.67	4.53	5.13	4.79	11.74		8.97	8.58	3.71	1.71	4.29	8.13	8.02
		So	-	-	-	-	-	-	-	-	-	-	-	-		-	-	-	-	-	-	-
	HB32	Ss	0	0	0	0	0	0	0	0	0	0	0	0		0	0	0.44	0	0	0	0
		So	0.5	0.29	2.67	0.23	0.89	0	0	0.14	0	0	0.25	0.56		0	1.42	0.22	0.16	0	0.17	1.17
	HB33	Ss	11.52	14.81	8.99	8.02	7.85	5.06	9.01	16.2	12.78	9.23	12.04	17.31		13.01	9.74	14	8.78	18.23	13.57	12.45
		So	53.43	62.31	64.63	51.4	37.07	29.52	31.21	32.37	34.18	35.22	43.83	45.63		45.79	81.55	35.32	34.59	44.41	57.9	74.21
	HB36	Ss	246.83	271.91	147.79	417.43	198.95	256.26	387.77	534.81	767.93	636.54	336.17	378.23		290.2	163.69	282.7	372.67	681.88	509.84	199.35
		So	179.81	217.74	326.85	255.61	208.97	205.18	186.75	126.07	115.66	138.47	160.86	165.46		125.8	294.1	268.07	130.92	125.44	215	215.42
	HB39	Ss	79.3	107.52	69.56	43.03	40.88	20.91	17.21	26.98	28.1	33.59	30.65	66.15		76.39	62.54	32.42	21.07	29.05	26.45	84.83
		So	53.24	44.68	110.57	58.66	37.01	29.18	28.29	42.6	36.88	39.45	42.56	41.92		34.78	68.09	42.19	34.82	33.83	39.99	73.57
	HB61	Ss	503.89	252.29	146.64	391.22	252.36	402.43	645.2	670.29	723.92	726.15	527.78	492.86		581	282.66	286.73	649	815.89	699.48	439.64
		So	349.41	380.92	222.78	198.77	226.42	222.57	265.55	417.37	382.59	421.42	487.85	533.57		349.37	304.65	218.12	286.81	341.83	362.97	301.23
	HB62	Ss	55.16	199.19	275.07	55.06	70.57	3.71	2.98	15.59	5.99	11.17	44.02	110.07		50.07	211.81	34.16	6.84	17.01	32.37	71.33
		So	55.28	98.84	117.85	49.65	31.37	4.85	4.96	5.37	8.66	8.34	13.91	21.6		29.88	187.66	37.3	3.38	10.57	33.33	109.23
	HB69	Ss	0.09	4.95	6.3	0.76	0.12	0.53	0.22	0.13	0.63	0.61	1.87	0.19		0.11	0.86	0.49	0.52	0.47	0.74	1.44
		So	-	-	-	-	-	-	-	-	-	-	-	-		-	-	-	-	-	-	-
	HB85	Ss	156.21	181.55	113.97	162.63	125.53	108.5	104.59	155.53	173.55	209.17	214.29	219.59		187.5	164.12	123.9	118.36	205	207.81	215.56
		So	233.39	217.2	168.82	178.67	173.84	147.23	150.31	168.69	180.37	184.1	195.05	201.48		149.58	182.87	155.5	165.52	173.72	197.9	232.45
	HB94	Ss	0	0	0	0	0	0	0	0	0	0	0	0		0	0	0	0	0	0	0
		So	98.99	150.93	92.94	115.06	92.04	93.02	85.47	98.87	86.69	111.53	131.06	135.54		99.37	154.28	115.53	77.97	114.64	162.96	126.31
HD-ZIPⅡ	HB10	Ss	1.12	1.1	1.09	1.89	1.42	3.2	4.02	2.86	2.6	2.75	1.46	1.58		2.22	2.09	2.92	2.14	2.54	2.22	2.12
		So	9.71	14.25	6.04	4.91	7.74	15.13	22.74	17.49	25.64	28.01	33.17	37.29		25.11	13.58	8.74	8.33	11.39	16.6	15.4
	HB12	Ss	35.42	26.84	28.94	35.81	31.46	28.93	31.22	41.07	38.19	43.41	38.7	37.32		33.63	43.76	28.65	37.33	49.1	38.12	39.85
		So	65.46	48.82	43.01	32.32	23.85	34.25	38.52	47.53	52.36	56.15	59.52	58.96		45.05	32.76	21.39	41.36	39.01	28.37	49.73
	HB23	Ss	90.5	80.86	65.78	46.76	34.01	27.6	29.61	32.2	56.03	55.22	58.57	77.62		91.45	92.92	32.79	24.1	59.28	77.51	105.68
		So	59.24	90.86	44.26	19.32	11.04	6.6	3.48	4.78	5.37	7.15	10.28	16.71		12.09	31.53	13.54	8.86	6.47	16.06	40.18
	HB37	Ss	23.53	95.14	40.82	43.96	33.95	23.61	27.1	31.33	47.05	35.39	26.15	61.73		38.29	66.66	37.22	30.67	37.8	35.05	33.21
		So	0.02	0.08	0	0.13	0.31	0.1	0.08	0.13	0.03	0.04	0.04	0.1		0.05	0.08	0.09	0.03	0.07	0.03	0
	HB58	Ss	0	0.13	0	0.32	0	0	0	0	0.19	0	0.12	0		0	0	0	0	0	0	0
		So	0	0	0	0	0	0	0	0	0.16	0	0	0		0	0	0	0.08	0	0.1	0
	HB63	Ss	0.37	0.94	0.54	0.14	0.33	0.38	0.47	0.51	0.28	1.06	0.44	0.43		0.35	0	0	0.19	0.71	0.53	0.59
		So	-	-	-	-	-	-	-	-	-	-	-	-		-	-	-	-	-	-	-
	HB64	Ss	1.88	1.73	0.78	0.98	3.27	1.54	1.04	1.03	2.04	0.33	1.1	0.68		1.57	0.71	0.6	2.46	2.06	0.45	1.58
		So	-	-	-	-	-	-	-	-	-	-	-	-		-	-	-	-	-	-	-
	HB65	Ss	2.94	2.87	1.43	3.15	1.66	2.67	4.3	3.15	4.04	5.83	5.44	3.41		3.87	1.99	2.12	3.48	4.83	4.43	3.24
		So	1.58	2.18	4.48	6.05	4.54	5.17	4.94	7.52	6.55	5.81	3.35	4.9		2.86	3.37	3.17	5.44	4.26	3.5	2.08
	HB67	Ss	0	0	0	0	0	0	0	0	0	0	0	0		0	0	0	0	0	0	0
		So	0.18	0.77	1.01	1.09	0.5	0.13	0.57	0.52	0.84	0.08	0.31	0.37		0.11	0.52	0.23	0.18	0	0.09	0.49
	HB73	Ss	0.51	1.33	1.41	3.17	4.46	2.36	3.58	5.15	3.13	2.66	1.89	1.54		3.68	7.39	0.43	3.87	4.14	2.73	2.98
		So	0.74	0.95	0.19	0.18	0.57	0.49	0.73	0.98	1.31	1.04	0.63	0.07		0.88	1.27	0.46	0.47	0.31	0.73	0.95
	HB95	Ss	0	0	0	0	0.08	0.09	0.11	0	0.06	0	0	0		0	0	0	0.05	0.13	0	0.11
		So	0.24	0	0	0	0	0	0	0	0.09	0.27	0.21	0.13		0	0	0	0.19	0.18	0.27	0.2
	HB96	Ss	10.41	7.87	9.57	19.36	13.17	19.74	19.48	34.1	25.89	23.21	18.79	10.89		9.17	9.17	16.55	23.11	24.52	18.45	10.69
		So	0.31	0.12	0	0.1	0.45	0.4	0.42	0.81	1.04	0.65	0.67	0.1		0.31	0	0.33	0.33	0.46	0.79	0.16
	HB99	Ss	12.47	9.87	6.59	5.95	3.83	3.56	7.57	12.15	9.32	10.21	9.95	10.05		8.93	13.69	7.4	6.94	9.71	7.58	7.81
		So	3.63	4.59	2.55	2.33	2.2	1.66	1.41	0.3	2.96	1.97	2.11	2.62		0.81	3.7	2.72	1.2	1.09	2.26	2.76
	HB100	Ss	0	0	0	0	0	0	0	0	0	0	0	0		0	0	0.55	0	0	0	0
		So	11.58	25.88	11.87	7.9	8.71	5.45	6.96	5.98	7.46	6.98	10.06	10.58		7.12	18.17	8.74	3.76	3.86	9.12	7.04
HD-ZIPⅢ	HB1	Ss	16.08	19.45	14.13	18.46	14.44	15.36	19.06	23.87	19.46	20.18	23.24	19.84		21.84	18.02	15.75	16.9	22.1	20.88	17
		So	32.66	36.2	25.16	25.65	27.07	27.89	30.03	29.76	28.06	25.07	28.89	26.38		33.24	31.14	32.05	24.46	28.47	35.21	25.45
	HB14	Ss	13.75	15.51	26	25.77	18.62	10.99	11.29	12.96	15.2	10.78	11.15	14.81		14.64	20.56	20.81	10.97	12.61	15.52	16.27
		So	21.33	27.2	13.33	17.56	10.74	15.65	12.67	16.01	15.52	15.83	20.97	23.53		26.67	24.53	10.01	8.08	13.33	30.14	16.37
	HB15	Ss	38.82	45.59	30.88	27.05	20.57	18.6	22.02	25.12	30.26	32.71	32.39	45.9		48.18	44.82	24.04	21.69	27.71	39.58	38.11
		So	19.6133	20.7567	21.67	14.8267	10.94	9.44667	11.75	11.5567	10.2533	12.24	14.0033	16.1033		17.92	22.8867	15.78	11.6967	14.0967	17.0433	12.9133
	HB42	Ss	3.6	2.02	1.43	4.22	1.69	2.69	4.71	7.09	9.63	8.16	7.59	3.14		4.17	1.93	1.07	3.79	8.97	8.54	3.01
		So	3.52	4.45	1.76	3.54	3.69	4.11	3.04	4.46	2.59	2.15	3.96	2.91		3.78	3.51	2.15	3.19	3.68	3.81	2.28
	HB47	Ss	1.27	0.24	0.27	1.54	0.7	0.99	1.96	2.73	3	2.96	3.14	1.48		1.21	1.19	1.15	1.65	2.43	2.1	1.03
		So	-	-	-	-	-	-	-	-	-	-	-	-		-	-	-	-	-	-	-
	HB48	Ss	0.05	0.14	0	0.27	0.22	0.24	0.57	0.72	0.56	0.72	0.78	0.17		0.26	0	0.16	0.41	0.21	0.91	0.24
		So	-	-	-	-	-	-	-	-	-	-	-	-		-	-	-	-	-	-	-
	HB56	Ss	9.07	16.76	17.21	8.17	6.91	1.77	1.31	1.98	3.23	3.81	14.81	14.26		11.98	9.11	15.31	1.34	3.97	9.29	15.34
		So	10.46	13.36	23.7	33.49	19.02	5.83	3.73	5.65	6.22	5.22	6.49	4.63		3.82	14.04	24.89	7.68	5.93	4.69	9.1
HD-ZIPⅣ	HB4	Ss	0.01	0.05	0.02	0.07	0	0	0.02	0.07	0.02	0.12	0.08	0.04		0	0.07	0.05	0.14	0.06	0.03	0.04
		So	0	0	0	0	0	0	0	0	0.05	0	0	0		0	0	0	0	0	0	0
	HB11	Ss	3.97	4.12	5.32	4.72	5.07	5.25	4.39	5.18	5.9	5.82	5.43	3.6		3.21	6.07	5.14	6.01	7.06	6.67	3.05
		So	5.18	5.8	4.36	3.06	4.35	4.44	5.51	4.37	5.11	5.68	5.7	7.33		6.43	5.72	2.8	3.04	4.12	5.78	6.54
	HB34	Ss	17.49	19.76	11.18	16.07	13.23	14.39	15.89	18.92	25.18	21.95	19.09	15.69		16.03	15.6	16.34	21.12	30.16	26.24	18.36
		So	15.04	19.82	13.55	12.22	7.94	8.32	7.8	9.92	11.34	15.04	14.66	20.31		13.34	18.98	10.81	8.09	11.41	14.78	18.76
	HB41	Ss	10.74	33.84	36.44	13.2	4.67	0.63	0.3	0.08	0.12	0.31	1.52	15.45		11.56	61.43	4.35	0.06	0.22	2.44	7.59
		So	1.67	2	1.1	1	2.25	1.49	2.26	2.43	1.56	2.57	1.58	2.09		2.23	1.9	1.27	1.05	1.82	1.68	1.4
	HB45	Ss	0.09	0.1	0.03	0	0	0	0	0	0	0	0	0		0.08	0.07	0	0.02	0	0.05	0.02
		So	-	-	-	-	-	-	-	-	-	-	-	-		-	-	-	-	-	-	-
	HB46	Ss	0.03	0	0	0	0	0	0	0	0	0	0	0		0	0.04	0.02	0	0	0	0
		So	-	-	-	-	-	-	-	-	-	-	-	-		-	-	-	-	-	-	-
	HB49	Ss	0	0.03	0	0	0	0	0	0	0	0	0	0.09		0	0	0	0	0	0	0
		So	0	0	0	0	0	0	0	0	0	0	0	0		0	0.02	0	0	0	0	0
	HB53	Ss	19.95	12.47	12.09	4.45	1.79	0.08	0.03	0.13	0.14	0.4	1.38	12.64		17.16	11.4	1.16	0.1	0.1	2.57	14.33
		So	0.41	1.66	1.85	0.6	0.2	0.11	0.03	0.07	0.04	0.02	0	0.14		0.04	0.96	1.34	0.08	0.03	0.17	0.35
	HB59	Ss	11.03	8.8	9.47	17.4	16.56	19.84	17.17	22.35	23.7	19.14	15.54	12.08		14.5	9.97	16.11	20.46	25.19	21.45	13.72
		So	22.19	26.86	13.04	15.88	12.92	12.85	16.87	18.65	20.89	26.39	22.47	29.33		25.83	27.66	14.67	14.75	20.89	23.7	21.69
	HB60	Ss	0.25	0.55	0.11	0.2	0.03	0.15	0.28	0.21	0.12	0.3	0.46	0.4		0.54	0.69	0.48	0.35	0.59	0.23	0.12
		So	0.74	0.85	3.35	0.84	0.7	0.62	0.87	0.55	0.67	0.31	0.79	0.72		0.52	1.38	1.2	0.35	0.51	0.42	1.2
	HB72	Ss	23.37	23.6	23.82	25.96	23.13	24.07	23.26	24.96	30.27	29.66	29.13	24.56		26.43	28.95	26.7	22.62	29.48	33.22	27.57
		So	8.76	15.51	11.73	14.11	13.73	11.91	11.68	7.93	7.97	8.58	8.14	9.03		9.05	14.74	15.92	9.66	8.63	8.65	10.94
	HB76	Ss	0.06	0.04	0.04	0.07	0	0.1	0.2	0	0.2	0.22	0.19	0		0.09	0.07	0.1	0	0.12	0.1	0.1
		So	0.8	0.67	1.33	0.24	0.33	0.24	0.28	0.38	0.09	0.35	0.36	0.24		0.5	0.42	0.32	0.15	0.44	0.22	0.25
	HB80	Ss	17.49	21.68	22.48	18.77	15.69	13.01	9.62	12.57	17.12	17.15	15.4	21.05		17.35	26.47	19.21	19.48	23.18	18.75	24.67
		So	31.5	24.54	40.43	25.54	18.2	12.27	12.95	19.73	18.3	24.72	18.46	23.62		18.4	23.19	20.79	19.74	18.42	18.65	31.12
	HB83	Ss	9.89	9.08	8.44	9.53	10.11	7.32	5.67	6.08	9.05	8.08	7.22	8		9.98	12.07	8.9	7.61	9.53	7.78	10.7
		So	6.79	8.8	6.81	4.29	3.55	4.43	6.05	5.64	5.17	6.42	6.76	7.82		5.73	7.1	3.42	4.55	6.44	5.91	7.03
DDT	HB31	Ss	2.39	1.1	0.64	6.54	14.2	32.08	32.6	28.04	16.47	13.62	13.04	2.7		2.73	0.59	10.6	31.62	19.63	8.45	2.16
		So	28.5	16.8	9.78	11.74	29.35	52.51	54.43	55.28	63.58	61.36	49.54	41.81		49.74	20.76	10.14	38.09	49.54	37.48	31.1
	HB54	Ss	29.82	24.81	29.63	34.64	32.73	34.82	36.97	38.56	35.41	36.73	39.65	26.25		36.23	31.79	39.65	37.37	44.46	43.71	30.45
		So	56.51	44.54	30.52	36.19	44.98	47.94	44.38	47.65	50.72	52.55	47.1	42.63		55.22	38.43	37.69	38.75	44.86	39.83	36.48
NDX	HB84	Ss	30.16	33.73	24.28	34.91	34.53	39.24	38.84	39.45	47.76	47.51	43.19	33.71		37.11	25.54	33.09	36.6	50.53	52.05	31.69
		So	-	-	-	-	-	-	-	-	-	-	-	-		-	-	-	-	-	-	-
	HB86	Ss	12.56	8.34	8.68	13.55	11.39	11.79	12.91	16.65	15.28	17.12	18.38	12.77		13.71	8.22	9.55	12.26	15.31	17.05	11.07
		So	34.94	31.37	27.02	33.44	34.25	31.67	33.34	34.79	35.12	35.68	29.56	28.12		30.38	26.31	32.6	29.94	31.33	30.86	24.63
PHD	HB68	Ss	19.82	18.12	14.79	22	18.11	17.49	22.39	24.75	21.91	26.54	28.33	17.76		22.2	16.11	17.42	18.26	17.53	25.8	19.43
		So	21.28	19.97	21.8	23.21	21.65	20.02	19.53	22.01	21.61	21.12	18.13	16.74		19.99	14.8	30.61	16.29	20.56	20.12	20.81
	HB88	Ss	4.81	5.24	4.48	4.96	4.24	4.37	4.4	5.13	5.18	5.06	6.45	4.52		5.12	3.76	2.36	4.53	5.89	6.13	5.1
		So	50.01	39.79	41.56	33.2	34.31	32.37	32.53	37.98	39.23	38.31	33.04	28.73		36.05	31.34	44.37	27.06	35.29	35.9	38.76
	HB92	Ss	7.26	8.36	4.88	7.77	5.11	7.4	7.77	7.61	8	8.05	7.11	6.64		8.7	5.22	7.26	5.4	6.87	6.82	8.24
		So	-	-	-	-	-	-	-	-	-	-	-	-		-	-	-	-	-	-	-
PINTOX	HB102	Ss	13.53	6.63	8.94	44.25	59.69	112.46	122.13	100.15	74.56	54.38	45.14	15.02		13.86	8.67	75.57	112.39	69.53	29.19	12.46
		So	102.13	78.27	70.06	61.13	93.06	120.76	132.67	135.44	153.01	141.24	134.82	116.53		130.89	83.19	77.76	126.59	126.4	131.68	128.49
PLINC	HB19	Ss	0.1	0	0	0.26	0	0	0.23	0.11	0	0	0.27	0		0	0	0	0	0	0.09	0
		So	0.67	0.08	0.32	0.32	0.16	0	0.16	0.11	0	0	0.11	0.07		0.13	0.61	0.09	0.19	0.1	0.16	0.34
	HB35	Ss	0.24	1.67	0.32	1.85	1.18	5.11	7.73	5.44	9.62	6.73	5.52	2.79		0.41	0.87	0.86	11.41	7.18	4.14	0.59
		So	0.38	0.92	0.07	0.07	0.94	1.97	3.77	0.24	0	0.18	0.55	2.4		1.4	0.43	2.55	1.61	0.77	1.03	0.34
	HB38	Ss	139.25	94.99	96.5	206.77	137.63	198.93	246.24	239.05	334.13	284.39	184.24	144.44		161.91	168.86	124.37	322.66	388.51	287.29	184.19
		So	48.36	44.63	38.87	66.26	64.09	62.52	69.04	77.03	72.34	85	93.08	108.08		62.6	39.58	65.07	74.91	65.2	63.77	43.05
	HB74	Ss	0.12	0.05	0	0.06	0.07	0.28	0.16	0.22	0.36	0.15	0.09	0.34		0	0.04	0	0.39	0.08	0.55	0
		So	0.04	0.41	0	0.2	0.24	0.43	0.17	0.16	0.24	0.27	0.33	0.33		0.16	0.09	0.16	0.26	0.05	0.66	0.05
	HB77	Ss	0.17	0.07	0.22	0	0.06	0.06	0.24	0.5	0.67	0.23	0.09	0.2		0.07	0.53	0.25	0.17	0.1	0.21	0.14
		So	1.23	6.23	1.39	1.23	0.9	1.04	0.44	0.34	0.27	0.29	0.78	0.86		0.72	4.61	1.12	0.25	0.2	0.77	2.25
	HB81	Ss	0.09	0	0.08	0	0	0.08	0	0	0	0	0	0		0	0	0	0	0.2	0	0.15
		So	0	0	0	0.06	0	0	0	0	0	0	0	0.07		0	0	0	0	0	0	0
	HB87	Ss	12.75	6.34	7.29	3.47	1.2	0.32	1.15	1.75	2.38	3.9	8.28	9.19		10.67	8.12	0.88	0.77	3.57	8.48	10.68
		So	-	-	-	-	-	-	-	-	-	-	-	-		-	-	-	-	-	-	-
	HB91	Ss	52.63	36.59	32.62	33.04	34.88	30.85	25.02	11.61	30.33	35.29	28.9	43.96		31.5	27.49	32.63	26.14	26.06	34.59	33.36
		So	16.89	26.52	7.04	27.14	27.6	22.04	22.35	13.33	9.79	16.61	15.69	21.69		11.19	16.62	26.88	25.5	10.12	12.8	9.6
	HB93	Ss	28.88	22.35	24.52	11.31	7.62	1.41	2.68	4.56	9.76	15.67	22.58	17.69		21.22	29.7	3.25	2.91	12.84	24.19	28.84
		So	6.1	4.72	2.25	2.97	1.62	4.04	4.08	3.43	5.11	7.84	7.79	12.67		5.57	5.39	2.89	5.19	3.41	6.9	6.34
SAWADEE	HB40	Ss	32.16	26.16	22.96	33.45	31.04	30.73	32.73	35.76	39.28	43.83	33.94	30.79		37.39	24.25	31.28	30.53	37.25	39.28	33.32
		So	-	-	-	-	-	-	-	-	-	-	-	-		-	-	-	-	-	-	-
	HB44	Ss	8.48	9.58	9.89	9.79	7.87	7.2	8.62	15.2	11.28	12.59	13.41	8.29		11.48	6.07	11.63	7.95	8.52	11.54	10.84
		So	56.35	43.43	49.89	57.08	49.38	51.9	56.62	56.34	59.92	54.34	54.33	44.52		46.81	44.66	61.58	51.74	49.62	60.88	46.58
	HB78	Ss	0	0	0	0	0	0	0	0	0	0	0	0		0	0	0	0	0	0	0
		So	0	0	0	0	0	0	0	0	0	0	0	0		0	0	0	0	0	0	0
WOX	HB9	Ss	0	0	0	0	0	0	0.1	0	0	0	0	0		0	0	0	0	0	0	0
		So	0.07	0	0.68	0.86	0.76	0.26	0.76	0.32	0.08	0.26	0.45	0.06		0.19	0.36	0.32	0.14	0.18	0.19	0.27
	HB30	Ss	0	0	0	0.06	0	0	0	0	0	0	0	0		0	0	0	0	0	0	0
		So	-	-	-	-	-	-	-	-	-	-	-	-		-	-	-	-	-	-	-
	HB50	Ss	0	0	0	0	0	0	0	0	0	0	0	0		0	0	0	0	0	0	0
		So	0.14	0.14	0	0.35	0	0	0	0	0	0.22	0.15	0.22		0.45	0.2	0	0	0.13	0	0
	HB52	Ss	9.94	15.07	10.49	9.93	10.6	7.05	8.66	14.06	12.26	10.31	11.5	10.6		10.71	9.68	8.19	7.47	9.19	12.24	11.06
		So	5.91	2.4	3.89	7.5	9.74	5.71	5.27	4	4.09	5.42	4.33	2.6		4.27	3.24	8.05	5.05	4.94	4.02	4.09
	HB55	Ss	0	0	0	0	0	0	0	0	0	0	0	0		0	0	0	0	0	0	0
		So	0	0.02	0	0	0	0	0	0	0	0	0	0		0	0.03	0	0	0	0	0
	HB57	Ss	0	0	0	0	0	0	0.17	0.09	0	0.09	0	0		0	0	0	0.13	0	0	0
		So	0	0	0	0	0	0	0	0	0	0	0	0		0	0	0	0	0	0	0
	HB70	Ss	0	0	0	0	0	0	0	0	0	0	0	0		0	0	0	0	0	0	0
		So	0	0	0	0	0	0	0	0	0	0	0	0		0	0	0	0	0	0	0
	HB71	Ss	0	0	0	0	0	0	0	0	0	0	0	0		0	0	0	0	0	0	0
		So	0	0	0	0	0	0	0.26	0	0	0	0	0		0	0	0	0	0	0	0.21
	HB79	Ss	0	0	0	0	0	0	0	0	0	0	0	0		0	0	0	0	0	0	0
		So	0	0	0	0	0	0	0	0	0	0	0	0		0	0	0	0	0	0	0
	HB82	Ss	0	0	0	0	0	0	0	0	0	0	0	0		0	0	0	0	0	0	0
		So	0	0	0	0	0	0	0	0	0	0	0	0		0	0	0	0	0	0	0
