# Supplementary material for: Expression Profiling and MicroRNA Regulatory Networks of Homeobox Family Genes in Sugarcane Saccharum spontaneum L
Source: Int J Mol Sci. 2022 Aug 5;23(15):8724. doi: 10.3390/ijms23158724 (PMC9369071; doi:10.3390/ijms23158724)
Supplement: Supplementary file 1 [file ijms-23-08724-s001.zip › Supplementary file 12.xlsx]

## Sheet: Sheet1
Supplementary Table S7 Summary of sRNA reads and compare rates from libraries prepared from representative leaf segments in S. Spontaneum
sample	raw reads	filter reads	filter distinct reads	mapped distinct reads	Align Rate
SES208-LF1-rep1	26491077	25142058	8471680	4004575	0.4727
SES208-LF1-rep2	26079094	23081562	9007417	4134753	0.459
SES208-LF1-rep3	21858321	19075265	6435658	3026107	0.4702
SES208-LF6-rep1	28089264	23517649	5293062	2210402	0.4176
SES208-LF6-rep2	30292826	23058786	4960183	2059760	0.4153
SES208-LF6-rep3	24215733	18517694	3872644	1454093	0.3755
SES208-LF10-rep1	25836909	19524190	4556937	1835680	0.4028
SES208-LF10-rep2	24745133	19136469	3379858	1191042	0.3524
SES208-LF10-rep3	30175322	22185014	4294646	1560311	0.3633
SES208-LF15-rep1	30269651	23364161	3651915	1339026	0.3667
SES208-LF15-rep2	27766172	14190592	2266238	837025	0.3693
SES208-LF15-rep3	29086765	11342399	3089159	1023698	0.3314
