# Supplementary material for: Expression Profiling and MicroRNA Regulatory Networks of Homeobox Family Genes in Sugarcane Saccharum spontaneum L
Source: Int J Mol Sci. 2022 Aug 5;23(15):8724. doi: 10.3390/ijms23158724 (PMC9369071; doi:10.3390/ijms23158724)
Supplement: Supplementary file 1 [file ijms-23-08724-s001.zip › Supplementary file 13.xlsx]

## Sheet: Sheet1
Supplementary Table S8 The detailed information of miRNA in S. Spontaneum
miRNA_name	miRNA_ID	ChrID	Strand	Precusort_Start	Precusort_End	Predict_Method	Mature_Seq	Star_Seq	Hump_Domainace	Mature_Abundance	Loop_Abundance	Star_Abundance	Other_Abundance	Strand_Bias	Precursor_Seq	Fold_Structure	MFE	Mature_ARM	matureHomo	starHomo	Flag
miR156seq1	miRP186	Chr2D	+	12099579	12099844	TwoPeak	TTGACAGAAGAGAGTGAGCAC	GCTCACTTCTCTCTCTGTCAGC	0.994901	1548	2	13	6	1	AAGCTATGCGTGCTCACTTCTCTCTCTGTCAGCCATTAGAACTCTCTCTCTCTCTCTCGATCGCACCCTCCCTCGATCTCTCTTTCGTTCTCTGTCGATCTCTCCCATGGTGATATTTATTTGCTTCTCTGCGTGTTCTCTTTCCTGAGCACACACACGACCTGTTTATGGTGCCTTAGGTTTTTTGCACTTTGCCTGAAGAGAGGAAGGCAAGGGGAGATGGGTTTTTGAAGGTTTGACAGAAGAGAGTGAGCACACACGGTGGT	..(((.((.(((((((((.((((.((((((((((.((((((((((((((((.......(((((.((.......(((........)))......)))))))((.((...)).)).........((......))((((.......(((((((((.((.((.....))...))))).))))))......)))).((((((..........))))))))))))).))).)))))).)).))))))))))))))))))))).)).)))...	-87.8	Three	fve-miR156e	bdi-miR156e-3p	Known
miR156seq2	miRP224	Chr3B	+	91574698	91574819	TwoPeak	CTGACAGAAGAGAGTGAGCAC	GCTCACTTCTCTCTCTGTCAGC	0.941176	39	0	9	3	1	AGAGGTGGAGGCTGACAGAAGAGAGTGAGCACACATGGTGCCTTTCTTGCATGATGAACGATCGAGAGGTTCATGCTCGAAGCTATGCGTGCTCACTTCTCTCTCTGTCAGCCATTAGAACT	.........(((((((((((((((((((((((.((((((....(((..((((((....(........)..))))))..))))))))).)))))))).))))).)))))))))).........	-57.5	Five	ama-miR156	bdi-miR156e-3p	Known
miR156seq3	miRP368	Chr5A	+	23737584	23737703	Up_OnePeak	GCTCACTGCTCTCTCTGTCATC	TGACAGAAGAGAGTGAGCAC	0.954545	20	1	1	0	1	GGGGGCGGGCGCGCGCGGTGACAGAAGAGAGTGAGCACACGGCCGGACGTGACGGCACCGGCAAAAGGATGTGCCGTCGCGGCCGCGTGCTCACTGCTCTCTCTGTCATCCGCTGGCCCC	.(((((.((((.....((((((((((((((((((((((.(((((....((((((((((...(....)...))))))))))))))).))))))))).)))).))))))))))))).)))))	-81.7	Three	zma-miR156e-3p	aof-miR156a	Known
miR159	miRP184	Chr3A	+	59377860	59378104	TwoPeak	TTTGGATTGAAGGGAGCTCTG	GAGCTCCTATCATTCCAATG	0.89893	37505	3028	473	1242	1	GATTTGAAGCGGAGCTCCTATCATTCCAATGAAGGGCCGTTCTGAAGGGTGGTTCCGCTGCTCGTTCATGGTTCCCACTATCCTATCTCATCATGTATGTGTGTATGTATTTTCGAGAGGGAGGAGAGGAGCTAGACTCTCATGGTGGTCGTCTTTGAGATAGGCTTGTGGTTTGCATGACCGAGGAGCTGCACCGTCCCCTTGCTGGCCGCTCTTTGGATTGAAGGGAGCTCTGCATCCTGATC	((((.((.(((((((((((.(((.(((((.((..(((((.....(((((((((.(.(((.((((.(((((....((((...(((((((((..((((((....))))))......((((.((..(((((........))))).......)).)))))))))))))...))))....))))).)))).))).).))))..)))))..)))))..)).))))).))).))))))))))).))..))))	-104.7	Three	bdi-miR159b-3p.1	bdi-miR159b-5p.1	Known
miR160seq1	miRP129	Chr2B	+	84866581	84866683	TwoPeak	TGCCTGGCTCCCTGTATGCCA	GCGTACGAGGTGCCAAGCATGG	0.990826	104	0	4	1	1	GCTAGGGAATATGCCTGGCTCCCTGTATGCCACTCGCACGGCTACCATGCACCCGGTGGCCGCTGCGGCTGGCGTACGAGGTGCCAAGCATGGCCCTCATACA	...((((..(((((.((((.((.(((((((((.(((((((((((((........)))))))).))))).))))))))).)).)))).))))).))))......	-60.3	Five	aof-miR160c	osa-miR160e-3p	Known
miR160seq2	miRP331	Chr4C	+	65805054	65805161	Up_OnePeak	GCGTGCAAGGGGCCAAGCATG	TGCCTGGCTCCTTGTATGCCA	0.979592	46	1	2	0	1	TCATATTGTGTGTGCCTGGCTCCTTGTATGCCACACATGTAGCCCAACCCGTATGCTATGGTTGCCTGCTGTGGGTGGCGTGCAAGGGGCCAAGCATGCATGCATTTT	.......((((((((.((((((((((((((((((.(((((((..(((((.(((...)))))))).)))).))).)))))))))))))))))).)))))))).......	-56.6	Three	zma-miR160a-3p	dpr-miR160	Known
miR160seq3	miRP476	Chr6B	+	1415148	1415258	Dn_OnePeak	TGCCTGGCTCCCTGAATGCCA	GCGTTGGGGGAGTCATGCAGG	0.980952	299	5	10	1	1	CGGCTCGTGCTGCCTGGCTCCCTGAATGCCATCCGAGAAGCAACGCCATCGTGTCTATGGCGTGCCTCCCGGTTGGCGTTGGGGGAGTCATGCAGGTTGCTTGCATTGCCT	.(((..(((((((.(((((((((.(((((((.(((.((.(((.((((((.......))))))))).)).))).))))))).))))))))).)))........)))).))).	-60.4	Five	aof-miR160a	NA	Known
miR162	miRP280	Chr4A	+	25478950	25479099	Up_OnePeak	TCGATAAACCTCTGCATCCAG	GGGCGCAGTGGTTTATCGATC	0.980565	553	0	2	11	1	TGCGGGTGGTGTCTGGGCGCAGTGGTTTATCGATCCCTTCCTTGCCTTGTGCTGGTCCGGGAGTAGTGGTGGTTCAAGCGTTTATTGTTGCAGCAGCTTGCAAACAACGCGGGAATCGGTCGATAAACCTCTGCATCCAGCTCTCCCTTG	...(((.((.(.(((((.((((.((((((((((((.(((((..(((.......)))..))))).......(((((..(((((..((((.((....))..))))..)))))..))))))))))))))))).)))).)))))).)))))...	-64.1	Three	fve-miR162-3p	zma-miR162-5p	Known
miR164seq1	miRP222	Chr4A	-	6993634	6993773	TwoPeak	TGGAGAAGCAGGGCACGTGCT	CACGTGCGCTCCTTCTCCAAC	0.980263	86	0	63	3	1	GCAAATCGTGCTGGAGAAGCAGGGCACGTGCTCGTCGACACGTCGGCGGCGCCTTGGCCCTTGGGCCGCCGCCGCTGGTCTGGCTGCACTGCATGCTTGGTCGCCGCAGCACGTGCGCTCCTTCTCCAACATGGCTTCTC	.....(((((.((((((((.((.(((((((((((.((((...(((((((((...(((((....))))).))))))))).(.((((((...))).))).))))).)).))))))))).)).)))))))).)))))......	-74	Five	ata-miR164a-5p	zma-miR164f-3p	Known
miR164seq2	miRP555	Chr7A	+	15113345	15113576	TwoPeak	TGGAGAAGCAGGGCACGTGCA	CATGTGCCCTTCTTCTCCATC	0.983721	1226	3	43	18	1	GGTGCGCGAGGTGGAGAAGCAGGGCACGTGCATTCTTTCCATCACCGGCCGGTTTGGCAGCGGGCCGGCTCACGCATCGCCTGCGCGGCGAGCGCGCGAGGCGGCAGCAGGCGGTCCGCGTCCGCCGGCGCCCGCTGGCCGCCGGCCGACCGGCTAGCTGTAGCTCCTCTGAAAGCCAGCTAGCCGGCCGATGGATGCGTGCATGTGCCCTTCTTCTCCATCGGGCACGCCT	((((.((..((((((((((.(((((((((((((.(..((((((..((((((((..((((((((((((((..(((((((((((((((.((...........)).)).)))))))))..))))..))))..))))))).))))))))))).(((((((((((..(((........))))))))))))))..)))))).).))))))))))))).))))))))))..)).)))).	-157	Five	aof-miR164	zma-miR164h-3p	Known
miR166seq1	miRP9	Chr1A	-	25850142	25850248	TwoPeak	TTCGGACCAGGCTTCATTCCC	AATGTTGTCTGGTCGGAGACC	0.860262	386	45	8	19	1	CAGTTGAGGGGAATGTTGTCTGGTCGGAGACCTAACACCGCGGATCCATGGAGCAGCATGCATGGTGGTGGATGGTTTCGGACCAGGCTTCATTCCCCCAACTCAAT	.(((((.((((((((..((((((((.((((((...((((((.(...((((......))))..).))))))...)))))).))))))))..)))))))))))))....	-62.5	Three	lja-miR166-3p	NA	Known
miR166seq2	miRP11	Chr1A	-	78543578	78543710	TwoPeak	GGAATGTTGTCTGGTTCAAGG	TCGGACCAGGCTTCATTCCCCT	0.948399	955	54	644	33	1	TGCTTCTGAGTGGAATGTTGTCTGGTTCAAGGTCTCGCTTGCGATTTAAGGATGATTCGTGCATGGCATGTGTAGTTTTTATTCCTTGAATCTGTGGGATCTCGGACCAGGCTTCATTCCCCTCAGCAATAGC	.(((.(((((.((((((..(((((((((.(((((((((....(((((((((((((....(((((.....)))))....))).)))))))))).))))))))).)))))))))..)))))).)))))....)))	-60.4	Five	ata-miR166a-5p	cas-miR166f-3p	Known
miR166seq3	miRP41	Chr1B	-	115439463	115439581	TwoPeak	TCGGACCAGGCTTCATTCCTC	GGAGTGTTGGCTGGCTCGAGG	0.997911	3304	6	40	1	1	GGGGTTTGTGGGGAGTGTTGGCTGGCTCGAGGCATCCGCGTCCTGGTTTGCAGATCGTTTTCCCTGCTACAGGACAGATCGAGAGGCGTCGGACCAGGCTTCATTCCTCGCAAACCGGT	..(((((((((((((((..(.((((.((((.((.((((.((((((....((((..........))))..))))))....)).)).)).)))).)))).)..)))))))))))))))...	-61	Three	sly-miR166c-3p	mtr-miR166e-5p	Known
miR166seq4	miRP85	Chr1C	-	55737074	55737176	TwoPeak	TCGGACCAGGCTTCATTCCCCT	GAATGTCGTCTGGCGCGAGACC	0.947368	323	15	1	3	1	CTTGTTGAGGGGAATGTCGTCTGGCGCGAGACCGGCCGGACAGTCGGCCGGCGGCGTCCTCTCGGACGGTCTCGGACCAGGCTTCATTCCCCTCAACAGCTCA	.(((((((((((((((..((((((..(((((((((((((....)))))))....(((((....)))))))))))..))))))..)))))))))))))))....	-66.4	Three	cas-miR166f-3p	zma-miR166i-5p	Known
miR166seq5	miRP256	Chr4B	-	17388234	17388341	TwoPeak	TCGGACCAGGCTTCATTCCCT	GGAATGTTGTCTGGCTCGAGG	0.754654	1561	505	20	9	1	TTACTTTGAGGGGAATGTTGTCTGGCTCGAGGTGCAGAAACATGCAGATCTCATCGCAGTCTAGGTTGTTGTTGATCTCGGACCAGGCTTCATTCCCTCAAGTAGAGC	((((((.(((((.((((..((((((.(((((((.(((.((((..(((((.........)))).)..)))).)))))))))).))))))..)))))))))))))))...	-43.6	Three	csi-miR166f-3p	cas-miR166a	Known
miR166seq6	miRP605	Chr8A	+	4872471	4872665	TwoPeak	GGAATGTTGTCTGGCTCGGGG	TCGGACCAGGCTTCATTCCCCC	0.864865	577	95	287	40	1	CGTCTTTGAGGGGAATGTTGTCTGGCTCGGGGGCGCCGCCGCTCGGCTCCTTCCTCCTCTTGTCTTCGCCATCTCCATCTCCATCTCCATCTCCATCTCTCTCTTCTTATCTTCTTTCTCCCTCTCTTGGAGACCAAGAGGACGGACACGGGTGGTGTAGATCTCGGACCAGGCTTCATTCCCCCCAAAAGGAAG	....((((.((((((((..((((((.((((((....(((((((((..(((....((((((((.........((((((..................................................)))))).)))))))).)))..)))))))))....)))))).))))))..)))))))).))))......	-70.55	Five	ata-miR166d-5p	lus-miR166k	Known
miR167seq1	miRP3	Chr1A	-	9898982	9899109	Dn_OnePeak	AGATCATCTGGCAGTTTCATT	TGAAGCTGCCAGCATGATCTGA	0.942308	42	1	7	2	1	TGGCACAAGGAGATGAAGCTGCCAGCATGATCTGAAACCATATGTGTTCTTGATTACCATCTGAAGAAAGAATTGACTTCATGGAAAACAGATGATCAGATCATCTGGCAGTTTCATTTTCTCGTGGC	.(.(((.((((((((((((((((((.(((((((((...(((.(((.(((((((......(((......))).......))).)))).))).))).))))))))))))))))))))))))))).))).)	-55	Three	eun-miR167a-3p	aof-miR167b	Known
miR167seq2	miRP12	Chr1A	-	67310436	67310593	Dn_OnePeak	AGATCGTCCGGCAGTTTCATC	TGAAGCTGCCAGCATGATCTGA	0.892857	21	3	4	0	1	ACCAGAGGTGGATGAAGCTGCCAGCATGATCTGAGACACTTGTGCTTGATCCTTTTACTGATTTCCAACTAGCCTGCATCTATATATCTTGATGCATTAATCATGGTCTGATGAGAGTTAAGCGATCAGATCGTCCGGCAGTTTCATCTTCTTATGGC	.(((.(((.(((((((((((((.(.(((((((((.........(((((((.(((.....((...(((.......((((((..........)))))).......)))))....))).)))))))..)))))))))).))))))))))))).))).))).	-56	Three	NA	aof-miR167b	Known
miR167seq3	miRP16	Chr1A	-	98775896	98776100	Up_OnePeak	TGAAGCTGCCAGCATGATCTA	GATCATGCTGTGACAGTTTCACT	0.910714	47	2	4	3	1	AGAGAAAGAGTGAAGCTGCCAGCATGATCTAACAACGGCATTGCTCCTCGTGTGCTTGTCTCCATGGAGAAGACTGCAGCAAAGCTTAGCTTAGCTTAGCTTAGCATCCACCATGGAGTGGAACACACATGTCATGGTGTGGGTTGCTGCGCGAGGCTTGCAAGTGATGGTTAGATCATGCTGTGACAGTTTCACTCTTTCCCTT	((.((((((((((((((((((((((((((((((....((.((((.((((((((((....((((((((.((.(.(((.(((.(((((......))))).))))))).))..))))))))...(((.(((((......))))).))))).))))))))...))))))....)))))))))))))).).))))))))))))))).)).	-98.7	Five	aof-miR167a	zma-miR167b-3p	Known
miR167seq4	miRP121	Chr2B	+	79284336	79284472	Up_OnePeak	GATCATGCTGTGCAGTTTCATC	TGAAGCTGCCAGCATGATCTG	0.844156	64	2	1	10	1	ATCCTCTAGTAGCTGAAGCTGCCAGCATGATCTGAGGTGTGGTTTATTTGCTAGTTGTCCACAGGCCCACACAGCATGCGTGATGGCCCAAAGCAACGATCGTCAGATCATGCTGTGCAGTTTCATCTGCTCGTGGA	.(((.(.(((((.((((((((((((((((((((((.(..((((......))))(((((.....((((..(((.......)))..))))....)))))...).))))))))))))).))))))))).))))).).)))	-62.6	Three	bdi-miR167c-3p	aof-miR167c	Known
miR167seq5	miRP630	Chr8A	-	11980344	11980451	TwoPeak	TGAAGCTGCCAGCATGATCTGG	AGATCATGTTGCAGCTTCACT	0.96376	629	1	222	31	1	GTGTGAGAGGTTGAAGCTGCCAGCATGATCTGGCTGCTCAAACGCCGGCAGGCCGGCGTCTCAAGTGCTCGATCACCAGATCATGTTGCAGCTTCACTCTCTCGCAAC	.(((((((((.(((((((((.((((((((((((.((.((..(((((((....)))))))...........)).))))))))))))))))))))))).)))))))))..	-61.2	Five	pab-miR167b	osa-miR167i-3p	Known
miR167seq6	miRP608	Chr8A	-	11980344	11980452	TwoPeak	TTGAAGCTGCCAGCATGATCTG	AGATCATGTTGCAGCTTCACT	0.973333	41	0	32	2	1	GGTGTGAGAGGTTGAAGCTGCCAGCATGATCTGGCTGCTCAAACGCCGGCAGGCCGGCGTCTCAAGTGCTCGATCACCAGATCATGTTGCAGCTTCACTCTCTCGCAAC	..(((((((((.(((((((((.((((((((((((.((.((..(((((((....)))))))...........)).))))))))))))))))))))))).)))))))))..	-61.2	Five	aof-miR167c	osa-miR167i-3p	Known
miR168	miRP246	Chr4A	-	68687286	68687373	TwoPeak	TCGCTTGGTGCAGATCGGGAC	CCCGCCTTGCACCAAGTGAAT	0.963372	3626	57	1345	132	1	CCGCCTCGGGCTCGCTTGGTGCAGATCGGGACCCGCCGCCCGGCCGACGGGACGGATCCCGCCTTGCACCAAGTGAATCGGAGCCGGC	(((.(((.((.(((((((((((((..(((((.(((...((((.....)))).))).)))))..))))))))))))).)).))).))).	-53.4	Five	ata-miR168-5p	ata-miR168-3p	Known
miR169seq1	miRP20	Chr1A	+	111279991	111280124	TwoPeak	GGGCAAATCATCCGGGCTAGC	TAGCCAAGGATGATTTGCCTGC	0.983607	66	0	54	2	0.99187	GCTATCTTTGATAGCCAAGGATGATTTGCCTGCAGCTAGCAACCTCTGAGCGCCCCTGCTGCCATGGCAAATGGCAATCAGGGCGACCAAGTGCTGCTTCTCCGGGCAAATCATCCGGGCTAGCTGAGTACCTC	.....(((...(((((..((((((((((((((.((..((((.(((.((..(((((.((.((((((.....))))))..)))))))..)))).).)))).)).)))))))))))))).)))))...)))......	-61.5	Three	NA	mdm-miR169b	Known
miR169seq2	miRP21	Chr1A	+	111280345	111280462	TwoPeak	TAGCCAAGGATGATTTGCCTGT	GGGCAAATCATCTGGGCTAAC	1	325	0	48	0	1	GGCATCTTTGATAGCCAAGGATGATTTGCCTGTAGCAACCTCTGAGAGCTCCTGCTGCCATGGCAGTCAGGAGCACCAAGTGTCTCCGGGCAAATCATCTGGGCTAACTAAGTACCTC	((...(((.(.(((((..((((((((((((((.((..((...((.(.(((((((((((....)))).))))))).))).))..)).)))))))))))))).))))).).)))..))..	-53.6	Five	ata-miR169a-5p	NA	Known
miR169seq3	miRP60	Chr1C	-	96516060	96516177	TwoPeak	TAGCCAAGGATGATTTGTCTGT	GGGCAAATCATCTGGGCTAAC	0.991071	63	0	48	1	1	GGCATCTTTGATAGCCAAGGATGATTTGTCTGTAGCAACCTCTGAGTGCTCCTGCTGCCATGGCAGTCAGGAGCACCAAGTGTCTCCGGGCAAATCATCTGGGCTAACTAAGTACCTC	((...(((.(.(((((..((((((((((((((.((..((...((.(((((((((((((....)))).))))))))))).))..)).)))))))))))))).))))).).)))..))..	-56.1	Five	ata-miR169a-5p	NA	Known
miR169seq4	miRP92	Chr1D	-	112011165	112011282	TwoPeak	TAGCCAAGGGTGATTTGCCTGT	GGGCAAATCATCTGGGCTAAC	1	78	0	48	0	1	GGCATCTTTGATAGCCAAGGGTGATTTGCCTGTAGCAACCTCTGAGTGCTCCTGCTGCCATGGCAGTCAGAAGCACCAAGTGTCTCCGGGCAAATCATCTGGGCTAACTAAGTACCTC	((...(((.(.(((((..((((((((((((((.((..((...((.(((((.(((((((....)))).))).))))))).))..)).)))))))))))))).))))).).)))..))..	-51.3	Five	ata-miR169a-5p	NA	Known
miR169seq5	miRP134	Chr2B	-	27752772	27752965	TwoPeak	TAGCCAAGGATGAGCTGCCTG	GGCAGTCTCCTTGGCTAGTC	0.963303	88	4	17	0	1	CCTCGATCATAGGCAGTCTCCTTGGCTAGTCCGGGCGGCTCTCATCTGAAATCAATTCATGATTCATTCAGATATTGATGAGCGTGCGAGGGAAGAAGCATGCTGTGCAGCTACTAGCTGGGCAGAGGAGTGGCCTTGCATGGCGATGGAAGCTCTGCTTTGGTAGCCAAGGATGAGCTGCCTGTGGCCTCCAG	....(.((((((((((((((((((((((.((.((((.(((((((((((((((((.....))))...))))))...))).))))((((..........)))).((((.(((((...))))).)))).(((((..((((((...)))).))..))))))))).)))))))))))).)).)))))))))).).....	-82	Three	tcc-miR169i	ata-miR169i-3p	Known
miR169seq6	miRP358	Chr5A	-	65883162	65883313	Dn_OnePeak	TAGCCAAGAATGACTTGCCTATG	TGGGCAGGTCTTCTTGGCTAGC	0.789809	80	20	44	13	1	AGAGCCCCTTTTGCTAGCCAAGAATGACTTGCCTATGCACGCCCTATGTTGGCAATTCCACCAGCCATGGAGATTGCACAAGGTGAATCTTTGCGGCATGGATGATGCAATGTGGCTGCATGGGCAGGTCTTCTTGGCTAGCCAGAGTGCTC	.((((..((((.((((((((((((.((((((((((((((.(((..((((((.....((((...(((.((((((((.(((...))))))))))).))).)))).....))))))))))))))))))))))))))))))))))).)))).))))	-80.9	Five	bdi-miR169d	zma-miR169o-3p	Known
miR169seq7	miRP417	Chr6A	+	77017	77131	Up_OnePeak	TGGGCAGTCTCCTTGGCTAGC	TAGCCAAGGATGACTTGCCTATG	0.825	28	0	5	7	1	AGGGCCTGCCTCTGATAGCCAAGGATGACTTGCCTATGTCCTTTGTTCCAAAGGATTCAGAATGTGAACCTTTGAGTTGGTTCATGGGCAGTCTCCTTGGCTAGCTGAGTGGCCC	.(((((...(((...((((((((((.((((.(((((((..((......((((((.((((.....))))))))))....))..)))))))))))))))))))))...))).)))))	-58.4	Three	ata-miR169i-3p	ata-miR169c-5p	Known
miR171seq1	miRP4	Chr1A	+	5924683	5924784	Dn_OnePeak	TGTTGGCTCGGCTCACTCAGA	TGATTGAGCCGTGCCAATATC	0.904094	1527	7	19	157	1	GTAGCTATGATGTTGGCTCGGCTCACTCAGACCACCTCGCGCGCGAGATCATGTATGCCGCCGCTGGTGTTTCTGATTGAGCCGTGCCAATATCTTAGTACT	(((.(((.(((((((((.(((((((.(((((.((((..(((.(((..((.....))..)))))).))))..))))).))))))).))))))))).)))))).	-53.5	Five	zma-miR171e-5p	aof-miR171a	Known
miR171seq2	miRP21	Chr1A	+	80153310	80153415	Up_OnePeak	TTGAGCCGCGTCAATATCTCC	AGGTATTGGTGCGCCTCAATC	0.971014	132	2	2	2	1	CTAGGACGAGAGGGAGGTATTGGTGCGCCTCAATCCGAAGGCGTGGCTGATTGGCGCGACAGCCATGTTCTTGGATTGAGCCGCGTCAATATCTCCCTTTGCTTGT	.((((.(.(((((((((((((((((((.((((((((((.((((((((((.(((...))))))))))))).)))))))))).)))))))))))))))))))))))).	-61.8	Three	aof-miR171c	osa-miR171i-5p	Known
miR171seq3	miRP242	Chr4A	+	60332578	60332693	Dn_OnePeak	CGATATTGGTGAGGTTCAATC	TTGAGCCGCGCCAATATCACT	1	62	0	1	0	1	ATGGATCGAGCGATATTGGTGAGGTTCAATCAGATGATCGATGTATTTTAAATTTACATGCATGAAGGTGAATCCCCAGTGACTGATTGAGCCGCGCCAATATCACTTCCTTCCAC	.((((..(((.((((((((((.(((((((((((.......(((((.........))))).(((...((.....))...))).))))))))))).)))))))))).)))...)))).	-42.7	Five	fve-miR171f-5p	aof-miR171b	Known
miR171seq4	miRP327	Chr5A	-	8923409	8923512	TwoPeak	TTGAGCCGTGCCAATATCACG	GGATATTGGCGCGGTTCAATC	0.985981	183	3	28	0	1	GTAAACCTACGGGATATTGGCGCGGTTCAATCAGAAAGCTTGCGCTCCAAAGCCCAGGGGCTCCACTCTTTGATTGAGCCGTGCCAATATCACGTCCTCGCTTT	........(((.(((((((((((((((((((((((.((...(.(((((........))))).)..)).))))))))))))))))))))))).))).........	-49.2	Three	cas-miR171c-3p	zma-miR171b-5p	Known
miR171seq5	miRP559	Chr8A	-	16066670	16066772	TwoPeak	TTGAGCCGCGCCAATATCTCT	CGATATTGGTGAGGTTCAATC	1	91	0	62	0	1	AATGGAAAGAGCGATATTGGTGAGGTTCAATCCGATGATAGGTTTTACAACAGCTGTAAAATCAGTATCTGATTGAGCCGCGCCAATATCTCTTCCTCCTATT	...(((..(((.((((((((((.(((((((((.((((...(((((((((.....)))))))))..)))).))))))))).)))))))))).)))..)))....	-45.9	Three	cas-miR171a-3p	fve-miR171f-5p	Known
miR172seq1	miRP274	Chr4C	+	2083732	2083869	TwoPeak	GCAGCACCATCAAGATTCACA	AGAATCTTGATGATGCTGCAT	0.963171	1020	16	183	30	0.996013	TGCTTGCAGGTGCAGCACCATCAAGATTCACATCGTCCAACTCATGCATATTCAGTGATGCTCATGTGATGGCTCGCAGTTGCTATATATGCATATGTGATGAGATGAGAATCTTGATGATGCTGCATCAGCAGACAC	((.((((.(((((((((.(((((((((((.((((.....((..((((((((..((((((.....(((((....)))))))))))..))))))))..)).....)))).))))))))))).))))))))).)))).)).	-60.4	Five	stu-miR172b-5p	aof-miR172	Known
miR172seq2	miRP303	Chr4D	-	3259662	3259799	TwoPeak	AGAATCTTGATGATGCTGCAT	GCAGCATCATCAAGATTCACA	0.947368	183	7	123	10	0.984756	TGCTTGCAGGTGCAGCATCATCAAGATTCACATCGTCCAACTCATGCATATTCAGTGATGCTCATGTGATGGCTCGCAGTTGCTATATATGCATATGTGATGAGATGAGAATCTTGATGATGCTGCATCAGCAGACAC	((.((((.(((((((((((((((((((((.((((.....((..((((((((..((((((.....(((((....)))))))))))..))))))))..)).....)))).))))))))))))))))))))).)))).)).	-65.1	Three	aof-miR172	csi-miR172b-5p	Known
miR390	miRP32	Chr1A	-	107188319	107188503	Up_OnePeak	AAGCTCAGGAGGGATAGCGCC	CGCTATCTATCCTGAGCTCCA	0.945946	34	2	1	0	1	ACAATCCTTGAAGCTCAGGAGGGATAGCGCCTAGGACATCACATAGATTGGAGCTAGCCATGAGGAGAAAGCGAGAGAGGCAGAGAGATATGTGAATCTCTGAATCCGCTGCTCTCTTTCTCTTCTCAAAGTTGGTTCTGTCTATCAATCTGAAGCGCTATCTATCCTGAGCTCCACGGCTTGTT	((((.((.((.(((((((((.(((((((((...(((......((((((.(((((((((..((((((((....(((((((((((((((((......)))))).......)))).)))))))))))))))..)))))))))))))))...)))...))))))))).))))))))).)).)).)))).	-84	Five	aof-miR390	bdi-miR390a-3p	Known
miR393seq1	miRP200	Chr3A	+	51427283	51427398	Dn_OnePeak	TCCAAAGGGATCGCATTGATC	TCATGCGATCCTTTTGGAGG	0.971831	68	1	1	1	1	GGAGGAAGCATCCAAAGGGATCGCATTGATCCATCATTCCTTCCATTCTTTCATGGCTGGTCGTCGTCTACAAGGACTTCTCGACGGATCATGCGATCCTTTTGGAGGCTTCCCCT	((.((((((.((((((((((((((((.(((((.......(..((((......))))..)((((..((((....))))....))))))))))))))))))))))))).)))))))).	-57.8	Five	aof-miR393b	zma-miR393b-3p	Known
miR393seq2	miRP383	Chr5A	+	1918182	1918289	TwoPeak	CTCCAAAGGGATCGCATTGAT	TCAGTGCAATCCCTTTGGAAT	0.913472	739	59	95	20	1	CTAGTGGAGGACTCCAAAGGGATCGCATTGATCTCACCTGCCGCATGCATGGCGCCGCTGCGCGAGAGAGGACAAGATCAGTGCAATCCCTTTGGAATTTTCCACTTG	..(((((((((.(((((((((((.((((((((((..(((....(.(((.((((...)))).))).)..)))...)))))))))).))))))))))).)))))))))..	-54.3	Five	aof-miR393b	bdi-miR393b-3p	Known
miR394	miRP101	Chr2A	-	24644164	24644252	Up_OnePeak	TTGGCATTCTGTCCACCTCC	AGGTGGGCATACTGCCAATG	0.89739	995	1	2	113	1	TGAGAGTTCCTTGGCATTCTGTCCACCTCCTTGCCCATCCTCAATATCTGTTGTTTTTGGAGGTGGGCATACTGCCAATGGAGCTGTGT	..(.((((((((((((...(((((((((((............................)))))))))))...)))))).)))))).)..	-38.3	Five	aof-miR394	ata-miR394-3p	Known
miR395seq1	miRP368	Chr5B	-	3379029	3379134	TwoPeak	GTTCCCTTCAAGCACTTCACG	TGAAGTGTTTGGGGGAACTCT	0.977695	202	1	61	5	0.99262	TGTTACCACGAGTTCCCTTCAAGCACTTCACGTGAGGCACCATTGAAATAACTCTTTTTAAGATTAGGTGTAATGTGAAGTGTTTGGGGGAACTCTCGGTGATACT	(((((((..(((((((((.((((((((((((((...(((((.((((((.......)))))).....))))).)))))))))))))))))))))))..)))))))..	-49.3	Five	zma-miR395p-5p	aof-miR395a	Known
miR395seq2	miRP369	Chr5B	-	3379366	3379451	TwoPeak	GTTCCCTGCAAGCACTTCACG	TGAAGTGTTTGGGGGAACTCT	0.915385	172	8	66	14	0.992366	TGTCCCCAGGAGTTCCCTGCAAGCACTTCACGAGGCATCTTTCTGAGAGTTTTTGTGAAGTGTTTGGGGGAACTCTTTGTGTCACA	((.(.(.(((((((((((.((((((((((((((((..((((...))))..))))))))))))))))))))))))))).).).))..	-41.4	Five	bdi-miR395l-5p	aof-miR395a	Known
miR395seq3	miRP370	Chr5B	-	3379499	3379631	TwoPeak	GTTCTCCACAAACTACTTCAGT	TGAAGTGTTTGGGGGAACTCT	0.897959	73	0	59	15	0.993243	TGTCACCTGGAGTTCTCCACAAACTACTTCAGTAGCTACACACACACCCCTAGTTTAATGCACTGTGTTTGCATGTTTGTGTGGAGCTGTGTGTGTACATAGTGAAGTGTTTGGGGGAACTCTGGGTGGCAAG	((((((((((((((((((.(((((.((((((.((..(((((((((((((.((.....(((((.......))))).....)).)).).))))))))))..)).)))))))))))))))))))))))))))))..	-69	Five	zma-miR395a-5p	aof-miR395a	Known
miR395seq4	miRP364	Chr5B	-	3379509	3379630	Up_OnePeak	TGAAGTGTTTGGGGGAACTC	GTTCTCCACAAACTACTTCAGT	0.865103	184	3	111	43	1	GTCACCTGGAGTTCTCCACAAACTACTTCAGTAGCTACACACACACCCCTAGTTTAATGCACTGTGTTTGCATGTTTGTGTGGAGCTGTGTGTGTACATAGTGAAGTGTTTGGGGGAACTCT	.......((((((((((.(((((.((((((.((..(((((((((((((.((.....(((((.......))))).....)).)).).))))))))))..)).)))))))))))))))))))))	-52.9	Three	aof-miR395a	zma-miR395a-5p	Known
miR395seq5	miRP426	Chr5D	-	7482088	7482174	Up_OnePeak	GTTCCCTGCAAGCACTTCACA	TGAAGTGTTTGGGGGAACTC	0.841991	198	26	191	47	0.991416	GTTACTAGGAGTTCCCTGCAAGCACTTCACAAGACCTTGACTTAATAAAGGGCCCTTGTGAAGTGTTTGGGGGAACTCTTGGTATCA	(.(((((((((((((((.(((((((((((((((.((((.........))))...)))))))))))))))))))))))))))))).).	-50.9	Five	bdi-miR395n-5p	aof-miR395a	Known
miR395seq6	miRP427	Chr5D	-	7482471	7482628	Up_OnePeak	GTTCTCTGCAAGCACTTCACA	TGAAGTGTTTAGGGGAACTC	0.916667	44	1	33	6	0.988235	AGAGCTTTTGTGAAGTGTTTAGGGGAACTCTCGCTGCCACTAACCATTTGCTAGAGGTTGGCCAAGTGTGTGCCACATGAAATGATTTGAAGACAAACCACATTCGGAAATAATATATAAGTTTGTTGTCCCCAGGAGTTCTCTGCAAGCACTTCACA	........((((((((((((.((((((((((....((((...(((.((....)).)))))))...(((((...)))))(((.((.((((....)))).))..)))((..((((((........))))))..)).))))))))))..))))))))))))	-45.2	Three	bdi-miR395n-5p	aof-miR395a	Known
miR395seq7	miRP458	Chr6A	+	55648355	55648469	TwoPeak	GTTCCCTGCAAACACTTCACA	TGAAGTGTTTGGGGGAACTCT	0.949791	168	1	59	11	1	TGTCCCCTGGAGTTCCCTGCAAACACTTCACAAGCTAGACCATTGTATGCCCTTGCACAATGTGGTATCTGATTACCTAGCTAGTGAAGTGTTTGGGGGAACTCTAGGTGTTACC	.....(((((((((((((.((((((((((((.(((((((((((....(((....)))....)))))..........)))))).))))))))))))))))))))))))).......	-57	Five	ata-miR395b-5p	aof-miR395a	Known
miR395seq8	miRP420	Chr6A	+	55648762	55648889	TwoPeak	TGAAGTGTTTGGAGGAACTC	AGTTCCTCCCAAACACTTCATC	0.991736	113	1	7	0	1	TGAGACCAATGTGAAGTGTTTGGAGGAACTCTTGATGCCAACAAGCATTTTTGTCCGAATAGTTGGTTTCGTAGTTTGTAGCCGGTTGCTTCCCGGAGTTCCTCCCAAACACTTCATCAGCTAGGCCA	.....((..(((((((((((((((((((((((.((.((.(((..((.........((((........)))).........))..))))).))..))))))))).)))))))))))).))....))...	-44.2	Five	bdi-miR395p-3p	eun-miR395-3p	Known
miR395seq9	miRP460	Chr6A	+	55648910	55649048	TwoPeak	TGAAGTGTTTGGGTGAACTCC	GTTCCCTTCAAGCACTTCACA	0.827177	1248	9	6	253	0.998682	TAGGCGGCTAGTGAAGTGTTTGGGTGAACTCCAGGTGGCACTTCGACAATTTGCACACCAAGTCAATGAAGGTAGAGGTTAGTAGAGTCACACTTGGTGTCTTCAGGAGTTCCCTTCAAGCACTTCACATGGAGCATTC	...((..(((((((((((((((((.(((((((.((.((((((..(((..(((((..(((.................)))..))))))))......)))))).)).)))))))))..)))))))))))).))).))....	-48.2	Five	zma-miR395o-3p	zma-miR395p-5p	Known
miR395seq10	miRP459	Chr6A	+	55649018	55649111	Up_OnePeak	TGAAGTGCTTGGGGGAACTC	GTTCCCTTCAAGCACTTCACA	0.882483	239	1	159	52	0.995585	GTTCCCTTCAAGCACTTCACATGGAGCATTCTTTGTCTTGGAGAAAGCTTAATTTGATGCATTGTGAAGTGCTTGGGGGAACTCTTGATGTCAA	(((((((.(((((((((((((((((((.((((((.....)))))).)))).........)).))))))))))))))))))))............	-39.2	Three	sbi-miR395l	zma-miR395p-5p	Known
miR395seq11	miRP466	Chr6A	-	59698781	59698887	TwoPeak	GTTCCCTTCAAGCACTTCACA	TGAAGTGTTTGGGGGAACTCT	0.957447	254	3	61	11	0.990964	TGTTACCAAGAGTTCCCTTCAAGCACTTCACATGGAGCTTTGCATTATACTGGCGGATGTAGTCTTGAGACCAATGTGAAGTGTTTGGGGGAACTCTAGGTGTTACC	...((((.((((((((((.((((((((((((((((..(((...((((((........))))))...))).)).)))))))))))))))))))))))).)))).....	-47.4	Five	zma-miR395p-5p	aof-miR395a	Known
miR395seq12	miRP435	Chr6B	-	46895129	46895233	TwoPeak	TGAAGTGTTTGGGTGAACTCT	AGTTCCTCCCAAACACTTCATC	0.989189	176	0	7	2	1	TTGCTTCCCGGAGTTCCTCCCAAACACTTCATCAGCTAGGCCATGCACAACATCGACCTACTTTAGGCAGCTAGTGAAGTGTTTGGGTGAACTCTAGGTGGCACT	.((((.((.(((((((..((((((((((((((.((((..(((.......................))))))).)))))))))))))).))))))).)).))))..	-48.9	Three	zma-miR395o-3p	eun-miR395-3p	Known
miR396seq1	miRP243	Chr4A	-	4720180	4720276	Up_OnePeak	TTCCACAGCTTTCTTGAACT	TTCAATAAAGCTGTGGGAAA	0.975845	807	1	1	19	0.998794	CCTTGCCGTCTTCCACAGCTTTCTTGAACTGCATGCTGGTTGGCTATGCGTTCCAATTCCAAGAGGCAGTTCAATAAAGCTGTGGGAAATTGCAGAG	..((((.((.((((((((((((.(((((((((....(((((((.........))))..)))....))))))))).)))))))))))).)).))))..	-41.3	Five	aof-miR396b	vca-miR396-3p	Known
miR396seq2	miRP285	Chr4B	+	514091	514203	Dn_OnePeak	TCCACAGGCTTTCTTGAACTG	GTTCAAGAAAGTCCATGGAAA	0.970068	4827	149	2	0	1	GGCCATGTTCTCCACAGGCTTTCTTGAACTGTGAACTCGATCGGTTCATGTGGATCCTTTATTAGCTTGCTTGTCTTGTTGATGGTTCAAGAAAGTCCATGGAAAACATGGCG	.((((((((.((((..((((((((((((((((.(((..(((.(((....((.(((.....))).))..))).)))..))).))))))))))))))))..)))).)))))))).	-49.4	Five	ata-miR396b-5p	ata-miR396d-3p	Known
miR396seq3	miRP250	Chr4B	-	1802984	1803172	Up_OnePeak	TTCCACAGCTTTCTTGAACTT	GGTCAAGAAAGCTGTGGGAAG	0.890713	3752	308	372	198	1	TGCCATGCCTTTCCACAGCTTTCTTGAACTTCTTCTCCTCCCCCCCCCTCTCTCTCTCTCTCAGGGTAGCTTTCTTTGAACACCCCCCCCCCTCTCTCTCTCCCCCTCAAGAAGGGACACGCTTTCTTCGATCTCTCTCTCTCTCTCATCTCCGAAGAAGGTCAAGAAAGCTGTGGGAAGAAATGACAT	((.(((..(((((((((((((((((((.(((((((.........................((((((.......))))))...........................(((((((((......))))))).))......................))))))).)))))))))))))))))))..))).)).	-53.9	Five	csi-miR396f-5p	ata-miR396c-3p	Known
miR397seq1	miRP245	Chr4A	+	64717465	64717569	TwoPeak	TTGACTGCAGCGTTGATGAGC	TCACCGGCGCTGCACTCAATT	0.986813	885	1	13	11	0.998902	CAAAGGCATCATTGACTGCAGCGTTGATGAGCCGGCCGGCCAGCCGTGCGTCCCCTGCCGGCGCCGGCCACGGCTCACCGGCGCTGCACTCAATTACGCCTTTGC	(((((((...(((((.((((((((((.(((((((((((((..((((.(((.....))))))))))))))..)))))).)))))))))).)))))...))))))).	-68.5	Five	NA	sbi-miR397-3p	Known
miR397seq2	miRP269	Chr4B	-	68033011	68033115	TwoPeak	TTGAGTGCAGCGTTGATGAGC	TCACCAACGCTGCACTCAATT	0.914201	288	0	21	29	0.976879	CAAAGGCATCATTGAGTGCAGCGTTGATGAGCCGGCCGGCCAGCCGTGCGTCCCCTGTCGGCGCCGGCCACAGTTCACCAACGCTGCACTCAATTACGCCTTTGC	(((((((...((((((((((((((((.(((((.(((((((..((((.(((.....))))))))))))))...))))).))))))))))))))))...))))))).	-67.6	Five	stu-miR397-5p	atr-miR397b	Known
miR398seq1	miRP114	Chr2A	+	64578130	64578264	Up_OnePeak	TGTGTTCTCAGGTCGCCCCCG	GGGGCGGACTGGGAACACATG	0.822917	239	30	235	72	1	CAAGGCAGTTCCGGCGGGGGCGGACTGGGAACACATGTGAATGAGATGAGATTGCTCGGTCGTGCTGGCCTGGGCAGTCGCCGTAGTTGATCTGCTTGTATGCATGTGTTCTCAGGTCGCCCCCGCTGGGCCTTC	.(((((....((((((((((((..(((((((((((((((.(((((...(((((((((((.((.((((.(...).))))))))).)).)))))).))))).)))))))))))))))..))))))))))))))))).	-78.3	Three	ata-miR398g-3p	zma-miR398b-5p	Known
miR398seq2	miRP106	Chr2A	+	64578135	64578264	TwoPeak	GGGGCGGACTGGGAACACATG	TGTGTTCTCAGGTCGCCCCCG	0.928571	142	4	53	11	1	CAGTTCCGGCGGGGGCGGACTGGGAACACATGTGAATGAGATGAGATTGCTCGGTCGTGCTGGCCTGGGCAGTCGCCGTAGTTGATCTGCTTGTATGCATGTGTTCTCAGGTCGCCCCCGCTGGGCCTTC	.((.(((((((((((((..(((((((((((((((.(((((...(((((((((((.((.((((.(...).))))))))).)).)))))).))))).)))))))))))))))..))))))))))))).))..	-74.6	Five	zma-miR398b-5p	ata-miR398g-3p	Known
miR399seq1	miRP240	Chr4A	+	54284468	54284572	Up_OnePeak	TGCCAAAGGAGAATTGCCCTG	GTGCGGTTCTCCTCTGGCATG	1	33	0	2	0	1	GTGTGAAGAGGGTGAGAATCACAGTGCGGTTCTCCTCTGGCATGAAGGCTGAGAAGCTTGCCACGGCCCTTCCTTGCCAAAGGAGAATTGCCCTGCCATTCACAA	.((((((..((((((...))))((.(((((((((((.(((((.((((((((.(........).))).)))))..))))).))))))))))).)).)).)))))).	-43.8	Three	ata-miR399a-3p	zma-miR399a-5p	Known
miR399seq2	miRP290	Chr4C	-	58188759	58188865	Dn_OnePeak	TGCCAAAGGAGAACTGCCCTG	GTGCGGTTCTCCTCTGGCATG	1	12	0	2	0	1	GTGAGAATCACAGTGCGGTTCTCCTCTGGCATGAAGGCTGAGAAGCTTGCCACAGGGCTAGGCCACGGCCCTTCCTTGCCAAAGGAGAACTGCCCTGCCATTCAGAA	....((((..(((.(((((((((((.(((((.((((((((....(((((((....))).))))..))).)))))..))))).))))))))))).)))..))))....	-52.2	Three	gma-miR399n	zma-miR399a-5p	Known
miR399seq3	miRP563	Chr8A	-	65283698	65283891	Dn_OnePeak	TGCCAAAGGAGAGTTGCCCTG	GGCAGCTCTCCTCTGGCAGG	0.978142	353	0	5	8	1	GAAGACAGTTGTAGGCAGCTCTCCTCTGGCAGGCGGTCATCGTCGTCGTCATCGACTGCTGGTTCTGTCTTCTGTGTTCATCCGGATCCATCGTGCTAGCTGTAGCCGTGCATGCAGTAATATTCGATTACATGCATGCATGCACGCACGTACGTCGTCGTCCTGCCAAAGGAGAGTTGCCCTGCTACTGTCTT	.((((((((.(((((((((((((((.((((((((((.(..(((((((((.....((.((((((.......((((........))))........)))))).)).((.((((((((((((((.....))))).)))))))))))))).))).)))..)))).))))))).)))))))))).))))).))))))))	-91.9	Three	aof-miR399a	zma-miR399j-5p	Known
miR408	miRP199	Chr3A	+	48033217	48033480	Up_OnePeak	CTGCACTGCCTCTTCCCTGGC	CAGGGATGAGGCAGAGCATGG	0.813814	258	2	13	60	1	TATGGTTGGAGACAGGGATGAGGCAGAGCATGGGATGGGGCCATCAACAAAATTTCCAATTTCTGTCCTCCGCTAGGCCGCTACTGCATTTCTGTTTGCTTGCTCACAAAACGGAGGGATTTGTGAGAGTTATCAGGCAGAAAGAACAAAGAAGGTGCCTCCCTGGTGAAGTGGTGATGGCCTGACCTGAGACGGCTGAGAGCTCAGCTGGTGTCCTGTTGTTGCTTCCTCCCCTGCACTGCCTCTTCCCTGGCTCCCCACCGT	.(((((.((((.((((((.(((((((.(((.((((.(((((...(((((..................(((...(((((((.((((((.((((((((((....((((((((.(.....).))))))))......)))))))))).............(((.....)))...)))))).)))))))....))).(((((((....)))))))......)))))..))))).)))).))).))))))).)))))).))))..)))))	-107.5	Three	cpa-miR408	osa-miR408-5p	Known
miR479	miRP329	Chr5A	+	16262751	16262855	TwoPeak	CGTGGTATTGTTCCGGCTCATG	TGAGCCGAACCAATATCACTC	0.996845	294	0	22	1	1	AGACGACATGGCGTGGTATTGTTCCGGCTCATGTCCTTCTTGCTTCGAGTCTGTCGTTGGACTTGGACTGGATGTGAGCCGAACCAATATCACTCATGTATTCTT	(((..((((((.(((((((((...((((((((((((.......((((((((((....))))))))))..))))))))))))...)))))))))))))))..))).	-47.6	Five	NA	aof-miR479	Known
miR528	miRP46	Chr1C	+	4321827	4321930	Up_OnePeak	TGGAAGGGGCATGCAGAGGAG	CCTGTGCCTGCCTCTTCCATT	0.971564	177	0	28	6	1	TGGAAGGGGCATGCAGAGGAGCACGAGGCTTGGCTAAAAGCCGACCTGTGCTATGCTACCCCTCGCTGGCTCTCCTGTGCCTGCCTCTTCCATTCCTTCTGCTA	(((((((((((.(((.((((((((.(((.((((((...))))))))))))))..((((........))))...))).))).)))))))))))............	-49.1	Five	vca-miR528-5p	ata-miR528-3p	Known
miR529	miRP239	Chr4A	+	40204458	40204587	Dn_OnePeak	AGAAGAGAGAGAGTACAGCCT	GCTGTACCCTCTCTCTTCTTC	0.978723	40	1	6	0	1	GGCTAAAGGGAGAAGAGAGAGAGTACAGCCTTACCATGTGTACACACTCAGATCTCAACAGTCTCTTATATATGCTGTTACCTGCGAGTGTGTGATGAAGGCTGTACCCTCTCTCTTCTTCTCTTAGCTT	((((((.((((((((((((((.((((((((((..(((...(((((((((.(.....((((((...........)))))).....))))))))))))))))))))))).)))))))))))))).)))))).	-64.1	Five	bdi-miR529-5p	bdi-miR529-3p	Known
miR827	miRP237	Chr4A	+	34529929	34530072	Up_OnePeak	TTAGATGACCATCAGCAAACA	TTTTTGTTGGTGGTCATTTAACC	0.913858	207	20	37	3	1	GCTCCGAACCTGTTTTTGTTGGTGGTCATTTAACCATGCTTCCATCGATGGGTGCATGGTTTATGGCAGAGTGTGATGCCATGAACTCATCATGGTCATGCATGTGTGCATGGTTAGATGACCATCAGCAAACATGTTCACGAG	.(((.((((.((((..(((((((((((((((((((((((...(((..(((((((.(((((((((((((........)))))))))).))))))..))))..)))...))))))))))))))))))))))))))).))))..)))	-69.2	Three	ssp-miR827	zma-miR827-5p	Known
miR1432	miRP139	Chr2C	+	16981877	16981985	Up_OnePeak	TCAGGAAAGATGACACCAA	GGTGTCATCTTTCCTGAAGC	0.815436	150	3	93	52	0.977049	GCGCGTCCTACGCTCAGGAAAGATGACACCAACATCAGATGGACCGGTCGATCCGCGCCATGTCTGTCCGTCTGAAGTGGGTGTCATCTTTCCTGAAGCATAGGACTCG	.((.((((((.(((((((((((((((((((.((.(((((((((((((.....)))..........)))))))))).)).)))))))))))))))).))).)))))).))	-64.6	Five	ssp-miR1432	zma-miR1432-3p	Known
miR2118	miRP359	Chr5B	+	26414676	26414791	Up_OnePeak	TTCCCGATGCCTCCCATGCCTA	GGCATGGGAACATGGAGGAAAG	1	24	0	2	0	1	TCTAAGAGCAGTGGGCATGGGAACATGGAGGAAAGCCAAACTCTTCTTTACCTCTACAACTAGGGGTGGAGATTAGTTTAGTGTTTCCCGATGCCTCCCATGCCTATTGTTCTTAG	.(((((((((((((((((((((.(((.(.(((((..((((((..((((((((((((....))))))))))))..))))).)..)))))).)))..)))))))))))))))))))))	-66.1	Three	osa-miR2118p	NA	Known
miR2275	miRP430	Chr6A	-	66027699	66027847	TwoPeak	AGTGTTGGCGGGAACCAAATC	CTTGGTTTCCTCCAATATCTCA	1	20	0	3	0	1	GCAAGACAAGACTTGGTTTCCTCCAATATCTCATGTTCAGTTGATCAAATGATGTGTAGGTGCACTGGTGCAGTGCAGCTAGACGAGACTTGTCTGACGAATTTGGATGCTGAAGGTGAGTGTTGGCGGGAACCAAATCTCCAGCTGCA	(((.....(((.(((((((((.((((((.(((((.((((((...((((((...((.(((.(((((((...))))))).))).)).(((....))).....))))))..)))))).))))))))))).))))))))).))).....))).	-61.5	Three	NA	ata-miR2275c-3p	Known
miR5168	miRP40	Chr1B	-	115439203	115439332	TwoPeak	TCGGACCAGGCTTCAATCCCT	GGATTGTTGTCTGGCTCGGGG	0.953782	4725	219	104	15	1	TTAGGTTAGGGGGATTGTTGTCTGGCTCGGGGTCTCCGGTCGAGATCGATTGATATATATCTTCTGGCCTCTTGCCGGAGTTGTCGTCGACCGGAGATTTCGGACCAGGCTTCAATCCCTTTAACCATGC	...((((((((((((((..((((((.(((((((((((((((((((.((((............((((((.....)))))))))))).))))))))))))))))).))))))..))))))))))))))....	-74.3	Three	ata-miR5168-3p	zma-miR166k-5p	Known
miR5564seq1	miRP343	Chr5A	+	85220942	85221070	Dn_OnePeak	TGGGGAAGCAATTCGTCGAAC	TTGGCGAATTGTTGCCCCATG	0.94686	6467	289	1	74	0.999854	TGGCCTGCCGTGGGGAAGCAATTCGTCGAACAGCCGGAGCGCGTTCAATCGCGGGCCGCGCCGGGAACCTCCTGAGCCTCAGCCACGCACTCCAGCTGCTTGGCGAATTGTTGCCCCATGCCAGGCCGG	(((((((.(((((((.(((((((((((((.((((.((((.((((.........(((...(((((((...))))).))....))))))).)))).)))).))))))))))))).))))))).))))))).	-75.6	Five	sbi-miR5564a	NA	Known
miR5564seq2	miRP475	Chr6A	+	99262682	99262795	TwoPeak	TGGAAGCAATTCGTCGAACAG	TGTTTGGCGAATTGCTCCCATG	0.975981	20089	448	65	48	1	CTGGCCTGTCCTGGAAGCAATTCGTCGAACAGCTGCAGCGCGAGAGGGTGGTAGGCCTCAGCCTCGACACGCGCACGCGAGCTGTTTGGCGAATTGCTCCCATGCCAGGCCTTG	..((((((.(.(((.(((((((((((((((((((((.(((((.((((.(((......))).))))....)))))..)).))))))))))))))))))).))).).))))))...	-67.6	Five	sbi-miR5564a	NA	Known
miR5564seq3	miRP518	Chr6B	+	5552771	5552896	Dn_OnePeak	TGGGGAAGCAATTCGTCGAAT	TTGGCGAATTGCTCCACCCATG	0.892442	306	14	1	23	1	TAGCCTGCCGTGGGGAAGCAATTCGTCGAATAGCTCTTGCAGCGCTAGAGGTTGGTAGGCGTAAGCCTAGGCCTCGACCACGCGCACGCGAGCTGTTTGGCGAATTGCTCCACCCATGCCAGGCCC	..(((((.(((((((.((((((((((((((((((((.(((.(((...((((((..(((((....))))))))))).....))))))...)))))))))))))))))))).).)))))).)))))..	-74.7	Five	sbi-miR5564a	NA	Known
novel1	miRP2	Chr1A	-	3512027	3512097	Up_OnePeak	TGTGGCATTTAGGATCATGGG	CAAGATCTTCAATGCCACACT	0.96	17	0	7	1	1	ACCTCATTGGTGTGGCATTTAGGATCATGGGTTGTTTCTTCTCTTAATCCCAAGATCTTCAATGCCACACT	........(((((((((((.((((((.(((((((..........))).)))).)))))).)))))))))))	-30.2	Five	NA	NA	Novel
novel2	miRP46	Chr1B	-	90429320	90429423	Dn_OnePeak	TTTGTTGTGCTCTATATATAT	ATATATAGAGCACAACGAAGT	0.877193	49	0	1	7	0.982759	AAGTTTTTTTTATATATATAGAGCACAACGAAGTTTAGGCCCTGTTTTGCAGGAATCAAAACAAGGCCTAAACTTTGTTGTGCTCTATATATATGAAAAAAACT	.((((((((((((((((((((((((((((((((((((((((.(((((((.......))))))).))))))))))))))))))))))))))))))))))))))))	-66.4	Three	NA	NA	Novel
novel3	miRP62	Chr1C	+	23895610	23895755	Dn_OnePeak	TTAGAAACCACGAGACAAATT	TTTGTCTCGCGGTTTCAAGGCT	0.916667	19	1	3	1	1	CACAGTTTGGTTAGAAACCACGAGACAAATTTTTTAAGCCTAATTAGTTCACGATTAACCCTAAGTGCTACAGTAACAAACATGTGCTAATGACGGCTTAATTAGGCTTAATAAATTTGTCTCGCGGTTTCAAGGCTAGTTATGTA	.(((..((((((.((((((.((((((((((((.((((((((((((((.((...((((.........((.(((((.....)).)))))))))...)).)))))))))))))).)))))))))))).))))))..))))))...))).	-49.9	Five	NA	NA	Novel
novel4	miRP98	Chr2A	-	12091528	12091662	Up_OnePeak	TTTCGTCTATGGCTTTTGATG	TCAAAAGCCATAGTTGACAAG	0.895165	11179	26	58	1290	0.999841	TCCTCTTTCTTTTCGTCTATGGCTTTTGATGCAACGCGCCTCTGCTTGAGGGCGCCGCCCGTGGTCCAGCAGAGGCTTCGTGAGCAGTTGTCGCTGCGAGTTGCATCAAAAGCCATAGTTGACAAGAAAGAGGAG	(((((((((((.(((.(((((((((((((((((((.((((((((((.((((((...))))....)).))))))))).......(((((....)))))).))))))))))))))))))).))).))))))))))).	-79.6	Five	NA	NA	Novel
novel5	miRP127	Chr2A	-	108444476	108444581	Dn_OnePeak	ATTTGTAGAGGTGTCTGGATT	TCCAGCCATCTCTACAGATGA	0.955307	170	0	1	8	0.994444	AGCAGTTCTAGATCCAGCCATCTCTACAGATGAATTTTTAGAGGCCGCTCAATCTAGAGCTACCTCTAAAAATCGATTTGTAGAGGTGTCTGGATTTAGAGCTGTC	.((((((((((((((((.(((((((((((((..(((((((((((..((((......))))..)))))))))))..))))))))))))).)))))))))))))))).	-66.3	Three	NA	NA	Novel
novel6	miRP134	Chr2B	-	104192299	104192508	Up_OnePeak	TCGATGAGATCTACAACTTTGC	AAAGTTGTAGCTCTCAATGAGA	0.917169	608	52	1	3	0.996997	ATTGTAGCTCTCGATGAGATCTACAACTTTGCAGTTTTGAGGTTTTTCATTTGAGGACTTTAAGATGCTCAAAAAATTAATATAAAATTTCAGAAGCATAATAACCGCGTACAAGTGCTTGTCGTATTAGAAAAATAATATTGTTTTTGTATGCTGTCAAATAAAGATACTTTTTACACAAAAGTTGTAGCTCTCAATGAGATTTACAAC	.((((((.(((((.(((((.((((((((((...((...(((..((((.((((((.(........(((((....(((((.......)))))....))))).......(((((((((.((.....((((((......)))))).)).)))))))))).)))))).))))..)))...))...)))))))))).))))).))))).)))))).	-56	Five	NA	NA	Novel
novel7	miRP179	Chr3A	+	54243087	54243240	TwoPeak	TTAGGCTCAGGGACTATGGTG	CCGTGGCTCCTGCTCCTGATG	0.88287	392	72	211	8	1	GCTGCCTAACATTAGGCTCAGGGACTATGGTGCAGCCAAGGATGACTTGCCGATCGACTCGACGCCTCTGATGTCTGATCTCATCATCATCAGATCATCATCGGCAAGTTGTTCTTGGCTACACCGTGGCTCCTGCTCCTGATGTAAGGCTTTG	...((((.((((((((..(((((.((((((((.(((((((((((((((((((((.((...((....(((((((..((((...)))).))))))))).))))))))))))))))))))))).)))))))).)))))..)))))))).))))....	-84.4	Five	NA	NA	Novel
novel8	miRP183	Chr3A	-	58442811	58442900	Dn_OnePeak	TTTCCTATTCCATCCAGTCCGA	GGATTGGACGAACTGGAAACT	0.988971	267	0	2	3	1	CTGGGAGTCGTCGGATTGGACGAACTGGAAACTCGTGACGCGTCTCTGCGCAGCGTACTTTCCTATTCCATCCAGTCCGATGATTTCCAT	.(((((((((((((((((((.(((..(((((..(((..(((......)))..)))...)))))..)))..))))))))))))))))))).	-46.2	Three	NA	NA	Novel
novel9	miRP231	Chr3B	-	78240748	78240902	Dn_OnePeak	CCGTGGCTCCTGCTCCTGATG	TTGGGCTCAGGGACTATGGTG	0.898565	898	96	41	10	1	GGCGGCCTAACATTGGGCTCAGGGACTATGGTGCAGCCAAGGATGACTTGCCGATCGACTCGACGCCTCTGATGTCTGATCTCATCATCATCAGATCATCATCGGCAAGTTGTTCTTGGCTACACCGTGGCTCCTGCTCCTGATGTAAGGCTTTG	...(((((.((((((((..(((((.((((((((.(((((((((((((((((((((.((...((....(((((((..((((...)))).))))))))).))))))))))))))))))))))).)))))))).)))))..)))))))).)))))...	-84.1	Three	NA	NA	Novel
novel10	miRP228	Chr3C	+	78591541	78591741	TwoPeak	TAGAAATCTTTGGTCATTCAA	TGAATGGCCAAAGATCTCTTG	1	16	0	6	0	0.956522	GCTCAGAAAACTAGAAATCTTTGGTCATTCAACTATTGAAACCATTCACAATTAACCATCTGGTTGTTCTGCAGGCGTTTTTTTGCTGACATAGACTAGACATGTCAGCAGGGTCCACCGGTCAGTGTATACGTGTTTCTCCACCCTCTCATCTGAATGGTTTCAATACTTGAATGGCCAAAGATCTCTTGTTTTTAGTGA	(((..((((((.(((.((((((((((((((((.(((((((((((((((....(((((....)))))..((((.((.(...((((((((((((.(......)))))))))))))..).)).).))).......(((......))).........))))))))))))))).)))))))))))))))).))).)))))))))..	-73.4	Five	NA	NA	Novel
novel11	miRP334	Chr5A	+	31686929	31687089	TwoPeak	AAGAGAGGGCCTAAGAGCAGTG	TTGTTCTTAAGCGCTCCATC	0.891089	72	6	18	5	1	CTGGGAAGGGGAAGAGAGGGCCTAAGAGCAGTGGGAATGGGAACATGGAGGAAAGCCTATCCTGTTTGTTTCCTCCTTCAGAAACAGAGGTGGAAGCTTGGTCTGGTGTTTCCCGATGCCTCCCATTCCTATTGTTCTTAAGCGCTCCATCCTTTTCCTTT	..((((((((((.(.(((.((.((((((((((((((((((((.(((.(.((((((((...((.....((((((.((((........)))).))))))..))...))).)))))).)))..)))))))))))))))))))).)).)))).))))))))))..	-82.8	Five	NA	NA	Novel
novel12	miRP344	Chr5A	+	85743314	85743441	Dn_OnePeak	AGCAATTCGTCGAACAGCTGG	AGCTGTTCGACGAATTCCTCC	0.962233	13225	290	49	231	0.99848	GCCGTGCGGGAGCAATTCGTCGAACAGCTGGAGGCGCGCCACCGCGGCCGTGCCGCGCGATGCCGGGCAACCTGAGCCTCGACCACACACTCCAGCTGTTCGACGAATTCCTCCTCCACGCCACGGTT	((((((((((((.((((((((((((((((((((.........((((((...))))))(((.((((((...)))).)).)))........)))))))))))))))))))).))))....)).)))))).	-71.3	Five	NA	NA	Novel
novel13	miRP421	Chr6A	-	9901324	9901573	TwoPeak	AACTGTGTGCTGAAGATGACT	TCATCTTGTAGGACACAGTTAG	0.937158	588	16	98	30	1	TAGACGTATAGTCATCTTGTAGGACACAGTTAGCTAGGTTCACTGTCCAGATGGAGAGAATTGAAGCCACACTGTCTGCTTAATGTTCCCCTGGATCTTGCGGATATTGATCCTAGGATTGCCAATTGGTTTCTGAGAAGCATGTTGTGAGCGTTTACCCATGTGAGACGAGAGTACAAACTACAAAGAGATTTGAGGTTGTGGATAGTGAACCTAACAAACTGTGTGCTGAAGATGACTATGCCAACTA	.....(((((((((((((.(((.((((((((.(.(((((((((((((((.(.((.(.((((..((((..........))))...)))))))(((((((((.((((....))))))))))..))).(((..((((.....(((((..((((....)))).)))))......))))..)))(((.((((....)))).)))).))))))))))))))).).)))))))).))))))))))))))))......	-88.9	Three	NA	NA	Novel
novel14	miRP462	Chr6A	+	59024011	59024197	TwoPeak	AGACAGTGCTCCTCCGGTGCC	CACTAGCGGAGCACTGTCTGC	0.962963	41	2	11	0	1	CCCACCTAGGCAGACAGTGCTCCTCCGGTGCCTAAGCTGGCTTTGGCAGGTGGAGTTCTTTTGAGTTAACAGTCTAATTAGCGTTGGTTACGTCTGTGCCGATGCTGACTTGACAGTTAATCTCAAGAGAATTCCACTTTCTAAAGCCATTTTAGACACTAGCGGAGCACTGTCTGCCCGGGTGCCA	..(((((.(((((((((((((((.(.((((.(((((.(((((((((.(((((((((((((((((((((((.(((...(((((((((((.((....)))))))))))))...))).))))).)))))))))))))))))).))))))))).))))).)))).).))))))))))))))).)))))...	-115.9	Five	NA	NA	Novel
novel15	miRP431	Chr6A	-	66027972	66028066	Up_OnePeak	AGAGTTGTAGGAAACTGAACT	TTCAGTTTTCTCCAACATCTTA	1	22	0	7	0	1	TCTGAAGGTAAGAGTTGTAGGAAACTGAACTCTGCCTTGTTGTCTTCAGTTCCGTGACTGTCAGTTTCAGGAGTTCAGTTTTCTCCAACATCTTA	........(((((((((.(((((((((((((((....((....((.(((((....)))))..))...))))))))))))))))).)))).)))))	-31.9	Five	NA	NA	Novel
novel16	miRP432	Chr6A	+	91436075	91436236	Dn_OnePeak	GAATGTTGGAGGGGATCTAATGG	ATAGATTCCCTCCAGCATTTTG	0.953005	669	0	203	43	1	TTTAGACACCATAGATTCCCTCCAGCATTTTGAACATCGATTGTATTACTCTGTTGACGCACCAGTGCTGCCACCTCTCAACTACCTGGATGGGGCAATGCCAGAACTTGAGAGGCTTGAGTTGAAGTTCAGAATGTTGGAGGGGATCTAATGGTCTCGAAA	....((.((((((((((((((((((((((((((((.(((((((((.((((.(((....)))..)))).)))..((((((((....((((((......)).))))...))))))))....)))))).))))))))))))))))))))))).))))).))....	-69.1	Three	NA	NA	Novel
novel17	miRP447	Chr6B	-	53832965	53833059	Up_OnePeak	AGAGTTGTAGGAAGCTGAACT	TTCAGTTTTCTCCAACATCTTA	1	32	0	7	0	1	TCTGAAGGTAAGAGTTGTAGGAAGCTGAACTCTGCCTTGTCGTCTTCAATTCCGTGACAGACAGTTTCAGGAGTTCAGTTTTCTCCAACATCTTA	........(((((((((.(((((((((((((((...((((((((...........))).))))).....))))))))))))))).)))).)))))	-36	Five	NA	NA	Novel
novel18	miRP448	Chr6B	-	84632565	84632652	Up_OnePeak	TGGCCCTCGGCAAAGACACTC	AGGTCTTTGCCGAGGGCCAGG	1	20	0	3	0	0.958333	GCCCATGGCCTGGCCCTCGGCAAAGACACTCTTTGCCGAGGGCCCAAAGGCTGGCCCTCGGCAAAGAAGGTCTTTGCCGAGGGCCAGG	(((...)))((((((((((((((((((..(((((((((((((((........)))))))))))))))..)))))))))))))))))).	-75	Five	NA	NA	Novel
novel19	miRP556	Chr6C	+	59861578	59861692	TwoPeak	TGGAAGCAATTCGTCGAACGA	TGTTTGGCGAATTGCTCCCATG	0.992459	10474	17	54	63	1	CTGGCCTGTCCTGGAAGCAATTCGTCGAACGACTGCAGCGCGAGAGGGTGGTAGGCCTCAGCCTCGACCACGCGCACGCGAGCTGTTTGGCGAATTGCTCCCATGCCAGGCCCTG	..((((((.(.(((.((((((((((((((((.((((.(((((....(((.(.((((....))))).))).)))))..)).)).)))))))))))))))).))).).))))))...	-61.8	Five	NA	NA	Novel
novel20	miRP560	Chr6C	-	68011568	68011684	TwoPeak	TGGAAGCAATTCGTCGAACTG	TGTTTGGCGAATTGCTCCCATG	0.99495	13541	16	54	53	1	CTGGCCTGTCCTGGAAGCAATTCGTCGAACTGCAGCGCGAGAGGGTGGGGTGGTAGGCCTCTGCCTCGACCACGCGCACGCGAGCTGTTTGGCGAATTGCTCCCATGCCAGGCCCTG	..((((((.(.(((.(((((((((((((((.((..((((.(.(.((((.(.(((((....))))).)..)))).).).)))).)).))))))))))))))).))).).))))))...	-64.5	Five	NA	NA	Novel
novel21	miRP504	Chr6D	-	57613851	57613999	Dn_OnePeak	TTCACAAATTGTATAACCATC	CGGGTGTATTATTTGTGAATG	0.823529	41	1	1	8	1	GCATGGCAAAAGACGGGTGTATTATTTGTGAATGGGAAGATAATACTCACTATTTAGAAATAGGCAGGTGAGAAAAATACTTGTCGCCTGTTTCTAAACAGTGAGTGTTGTCATCATATTCACAAATTGTATAACCATCTTTTGCTATG	.((((((((((((.((..((((.(((((((((((.((.(((((((((((((.(((((((((((((.((((((.......))))))))))))))))))).))))))))))))).)).))))))))))).))))..)).))))))))))))	-75	Three	NA	NA	Novel
novel22	miRP609	Chr7B	+	32746376	32746477	TwoPeak	CGTAGAATCGGAGCTCTTCC	AAGGAGCTTTGATTCTACGAG	0.982201	1473	18	348	15	1	CGGATATCAAGAAGGAGCTTTGATTCTACGAGGGAGAGCGGCAACGGTCGTGGAAGACCGTGTTCCCTTCCTCGTAGAATCGGAGCTCTTCCTTGACCAAGT	.((...(((((.((((((((((((((((((((((((.(.((((.(((((......))))))))).))))))))))))))))))))))))).)))))))....	-59.8	Three	NA	NA	Novel
novel23	miRP614	Chr7B	+	39243690	39243803	Dn_OnePeak	GAGGAGCTTTGATTCTACGAG	CGTAGAATTGGAGCTCTTCCT	0.930233	239	9	1	9	1	GGATATCAAGGAGGAGCTTTGATTCTACGAGGGATAGCGGCAACGGTCGTGGAAGACCGTGTTCCCTTCCTCGTAGAATTGGAGCTCTTCCTTGACCAAGTACGGTGCCGTCCG	((((..(((((((((((((((((((((((((((..((.((..((((((......))))))...)))))))))))))))))))))))))))))))(((......)))...)))).	-62.6	Five	NA	NA	Novel
novel24	miRP584	Chr7B	-	65829312	65829413	TwoPeak	CGTAGAATCGGAGCTCTTCT	GAGGAGCTTTGATTCTACGAG	0.968652	377	7	241	13	0.996875	TGGACGTCAAGGAGGAGCTTTGATTCTACGAGGGAGAGCGGCAATGGTCGTGGAAGACCATGTTCCCTTCCTCGTAGAATCGGAGCTCTTCTATGGCCAAGT	.....((((.((((((((((((((((((((((((((.(.((((.(((((......))))))))).))))))))))))))))))))))))))).)))).....	-60.8	Three	NA	NA	Novel
novel25	miRP537	Chr7C	-	30283990	30284199	TwoPeak	TAAAGTTTAGACAAGGGAATC	TCCCCTCTTCTAAACTTTAGA	0.901499	536	12	306	80	0.996798	TTTTAGAGCTCTAAAGTTTAGACAAGGGAATCCAAACAGGCCCTTGTATGCTGTAGCATATATTCCAATTGAGCGATCTAGGAAATGAAGTACTTGCCATCAATTTCAATGTCCACTTCAAGATTTGAACTGCTCAAGAAGACTATTCATCCATTTTTTCTCTTAAGGGCCTGTTTGGATCCCCTCTTCTAAACTTTAGAGTTCTAAAAA	((((((((((((((((((((((..((((.((((((((((((((((((((((....)))))).......(((((((.....(((..((((((...........))))))...)))..(((((...))))).)))))))(((.....)))................)))))))))))))))).))))..)))))))))))))))))))))).	-83.8	Five	NA	NA	Novel
novel26	miRP652	Chr7D	-	32754568	32754769	Up_OnePeak	TCATTTCGGCGAGCATGTTCTC	GAAATGCTCGCCGAGATGATC	0.88125	140	11	1	8	0.981595	CGGACCATGTTCATTTCGGCGAGCATGTTCTCTGCCGAGCGGTAAGGGACGTCAAGGAGGAGCTTTGATTCTATGAGGGAGAGCGGCAACGGTCATGGAAGACCGTGTTCCCTTCCTCGTAGAATCGGAGATCTTCCGTGGCCAAGTACGGTGCCGTCCGGTGGAGAAATGCTCGCCGAGATGATCACGTAAGCAAGGTCAA	..((((.(((((((((((((((((((.((((((((((.((((((....((((((.((((((.(((((((((((((((((((.(.((((.(((((......))))))))).)))))))))))))))))))).)))))).))))...))....)))))).))))))))))))))))))))))))))........))).))))..	-115.5	Five	NA	NA	Novel
novel27	miRP683	Chr8A	+	20076373	20076572	Dn_OnePeak	AAATTGTAGATCTTGTCGAGA	TCGACAAGATCTACGACTTTCT	0.761364	66	14	1	7	0.967033	TCAAAACTAGAAATTGTAGATCTTGTCGAGATCTATAATTTTCATATAAAATTTATTTTCATTTAATTCCGTAAAAAAATATGATTTGATATGATTAATATATCTTAGAAAAATCATATTTTTTTTGCGGAATTAAATAAAAATAAATTTTATATGACAATTATAGATCTCGACAAGATCTACGACTTTCTAGTTTTGAG	((((((((((((((((((((((((((((((((((((((((.((((((((((((((((((.(((((((((((((((((((((((((((..((.(((......))).))...)))))))).))))))))))))))))))).)))))))))))))))))).))))))))))))))))))))))))))).))))))))))))).	-107.2	Five	NA	NA	Novel
novel28	miRP617	Chr8B	-	8315365	8315514	Up_OnePeak	TCAGTTGGTAGTCACTCAGG	CAAGTGAGTACCAACTGACT	0.776316	115	17	3	17	1	ACTTGGCCAGTCAGTTGGTAGTCACTCAGGAGGGAGAGGAGGAGAAAACACACCAGGTTTTGAGCAGAGGGAAAGGAGAGTACACATCAGGTTTTGAGCAGTATGTTCTCTCCTCTCCCTCCCAAGTGAGTACCAACTGACTGCCGAGTG	(((((((.((((((((((((.(((((..(((((((((((((.(((..(((.((...((((.((((.((.(..............).))..)))).)))).)).)))))))))))))))))))..))))).))))))))))))))))))).	-78.5	Five	NA	NA	Novel
