# Supplementary material for: Expression Profiling and MicroRNA Regulatory Networks of Homeobox Family Genes in Sugarcane Saccharum spontaneum L
Source: Int J Mol Sci. 2022 Aug 5;23(15):8724. doi: 10.3390/ijms23158724 (PMC9369071; doi:10.3390/ijms23158724)
Supplement: Supplementary file 1 [file ijms-23-08724-s001.zip › Supplementary file 17.xlsx]

## Sheet: Sheet1
Supplementary Table S9 The primers for qPCR verification of SsHBs, SsAGO10, and miRNA
Gene or miRNA	Forward Primer or Mature Sequence for miRNA	Reverse Primer
SsHB15	CGGTGGAACTATCGAGCTTATC	CACAAGACTGCCATCCTCAA
SsHB36	TACAGGGTGGTACTCTTCTTGA	GAAGCTCCCGTGGAAGAATAC
SsHB39	AGAAACTGCAAGCGAAGGA	GGAGCAGAGCTTGTCTTCTT
SsHB42	ATGATGGCTGGTCTCCTTTG	GGGCTGACATGAGATCCAATAA
SsHB43	AGTGAGGGTGTGTCCTCTAA	CAGCTTTGCCATCTTGTTCTG
SsHB97	CTGGGAGCTTGAACAAACTTTAC	GCTCTCACTGTCTACCTGATTG
SsAGO10	TAGACCAGAGCAGGTAGTGAA	CCATTGTTGTCAGGGAGGATAG
mi166-seq4	TCGGACCAGGCTTCATTCCCCT	/
mi171-seq1	TGTTGGCTCGGCTCACTCAGA	/
mi171-seq3	CGATATTGGTGAGGTTCAATC	/
mi171-seq5	TTGAGCCGCGCCAATATCTCT	/
