# Supplementary figures and images for: Expression Profiling and MicroRNA Regulatory Networks of Homeobox Family Genes in Sugarcane Saccharum spontaneum L.
Source: MDPI journal article supplement (doi:10.3390/ijms23158724), 2022-08-05

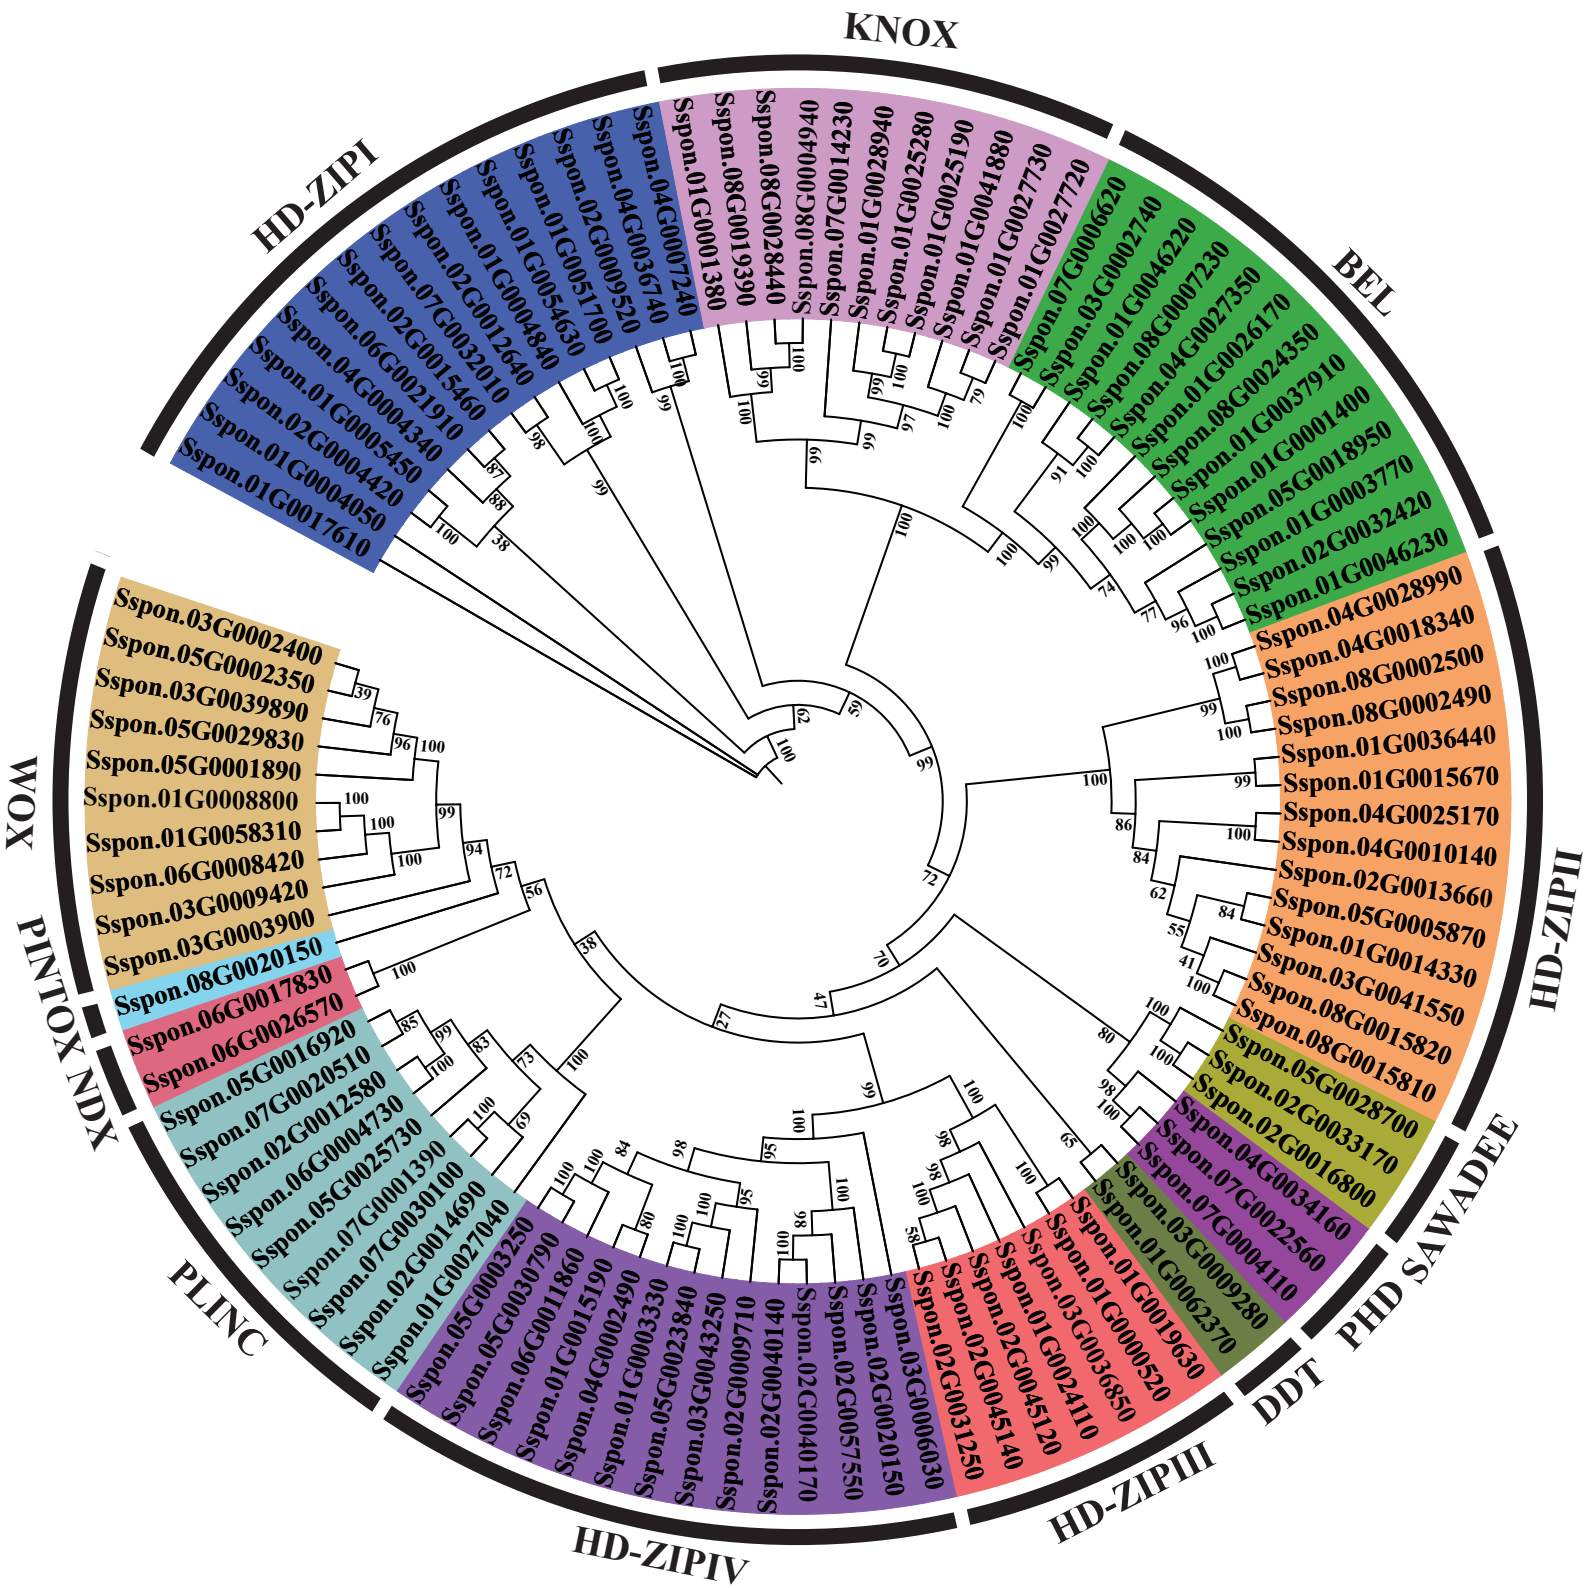

Supplementary Figure S1 The unrooted ML tree of SsHBs

Supplement: s1 [file s1]
